# Supplementary material for: Activation of Vitamin D Receptor Pathway Enhances Differentiating Capacity in Acute Myeloid Leukemia with Isocitrate Dehydrogenase Mutations
Source: Preprints.org preprint supplement (doi:10.20944/preprints202108.0529.v1), 2021-08-27
Supplement: Supplementary file 1 [file supplementary]

## Sheet: HL60 R132H
Table S2 : List of Pharmacological Substances by cohort (related to Figure 1A)
Pharmacological Substances (Genomatix) enriched in HR132H			ATRA-related Gene signature
			VD-related Gene Signature
Pharmacological substance	Pharmacological substance id	P-value	Adjusted p-value	# Genes (observed)	# Genes (expected)	# Genes (total)	List of observed genes	Gene ids
TRETINOIN	C0040845	0.00320634	n/a	29	16.9882	989	RET, CEBPA, EXOC6B, CFD, THEMIS2, ITGAM, IL5RA, LMNA, JUN, TNFAIP2, CSF3R, DHRS9, CCNA1, ICAM1, IGFBP2, SCPEP1, IL6R, APBB1IP, RXRA, IL6ST, NOG, RAB39A, CD38, BCL6, ITGAX, MIR223, ANPEP, HES1, ITGA5	5979, 1050, 23233, 1675, 9473, 3684, 3568, 4000, 3725, 7127, 1441, 10170, 8900, 3383, 3485, 59342, 3570, 54518, 6256, 3572, 9241, 54734, 952, 604, 3687, 407008, 290, 3280, 3678
DEXAMETHASONE	C0011777	1.74802e-05	n/a	22	8.00456	466	TSC22D3, CEBPA, CFD, KITLG, GPR65, FCGR1A, ICAM1, IGFBP2, IL6R, ANXA1, RXRA, RETN, IL6ST, CXCL8, CD244, DDIT4, ARNTL, HGF, LILRA2, TNF, HES1, ITGA5	1831, 1050, 1675, 4254, 8477, 2209, 3383, 3485, 3570, 301, 6256, 56729, 3572, 3576, 51744, 54541, 406, 3082, 11027, 7124, 3280, 3678
DOXORUBICIN	C0013089	0.00590729	n/a	21	11.5431	672	SLC22A16, CLC, NRP1, GLIPR1, HSPA1A, NFE2, TP53BP2, NLRC4, CCNA1, DDIT3, PLOD1, IL6ST, TET1, CYP4V2, BNIP3, BCL6, GLO1, LNP1, TNFRSF10B, HSPA1B, PRTN3	85413, 1178, 8829, 11010, 3303, 4778, 7159, 58484, 8900, 1649, 5351, 3572, 80312, 285440, 664, 604, 2739, 348801, 8795, 3304, 5657
IONOMYCIN	C0022020	3.38235e-06	n/a	18	5.06726	295	C5AR1, AHNAK, ITGAM, IL5RA, JUN, CR1, GPR65, IL6R, NLRC3, CD86, CXCL8, P2RY2, ITGAX, NFATC2, VIM, STAT6, CCR7, TNF	728, 79026, 3684, 3568, 3725, 1378, 8477, 3570, 197358, 942, 3576, 5029, 3687, 4773, 7431, 6778, 1236, 7124
HEPARIN	C0019134	0.00107967	n/a	17	7.3003	425	NRP1, ITGAM, CD82, TXNIP, IGFBP2, FURIN, ELANE, NOG, TFPI, HPSE, PVR, XYLT1, AZU1, ITGAX, CTSG, HGF, PCSK6	8829, 3684, 3732, 10628, 3485, 5045, 1991, 9241, 7035, 10855, 5817, 64131, 566, 3687, 1511, 3082, 5046
PORCINE HEPARIN	C0770546	0.00113622	n/a	17	7.33465	427	NRP1, ITGAM, CD82, TXNIP, IGFBP2, FURIN, ELANE, NOG, TFPI, HPSE, PVR, XYLT1, AZU1, ITGAX, CTSG, HGF, PCSK6	8829, 3684, 3732, 10628, 3485, 5045, 1991, 9241, 7035, 10855, 5817, 64131, 566, 3687, 1511, 3082, 5046
PROGESTERONE	C0033308	0.004246	n/a	16	7.62666	444	CD68, ITGA6, CABLES1, CD82, LGALS1, DHRS9, IGFBP2, HEG1, RETN, IL6ST, ZEB1, STAR, SLC2A3, VIM, STAT6, ARNTL	968, 3655, 91768, 3732, 3956, 10170, 3485, 57493, 56729, 3572, 6935, 6770, 6515, 7431, 6778, 406
INTERLEUKIN 12	C0123759	1.45873e-06	n/a	14	2.9373	171	TSC22D3, ITGAM, CXCL10, ICAM1, TNFAIP3, CD86, LILRB1, IL6ST, CXCL8, TCF4, TYROBP, ITGAX, CCR7, TNF	1831, 3684, 3627, 3383, 7128, 942, 10859, 3572, 3576, 6925, 7305, 3687, 1236, 7124
INTERFERON TYPE I	C0021743	0.000735663	n/a	14	5.1875	302	TSC22D3, FAM46C, APOBEC3G, TNFRSF10D, CD300A, NLRC4, CXCL10, NLRC3, CD86, LILRB1, IFITM1, TYROBP, YME1L1, OAS3	1831, 54855, 60489, 8793, 11314, 58484, 3627, 197358, 942, 10859, 8519, 7305, 10730, 4940
GLYCOSAMINOGLYCANS	C0017973	0.000735663	n/a	14	5.1875	302	LUM, NRP1, ADGRE2, CXCL10, IGFBP2, ELANE, GALNT3, TFPI, HPSE, CXCL8, XYLT1, CTSG, VIM, HGF	4060, 8829, 30817, 3627, 3485, 1991, 2591, 7035, 10855, 3576, 64131, 1511, 7431, 3082
ENDOPEPTIDASES	C0030946	0.00128369	n/a	14	5.49669	320	C5AR1, ADGRE2, FURIN, ELANE, GALNT3, CST7, AZU1, CTSG, NFATC2, ANPEP, HGF, PCSK6, ITGA5, PRTN3	728, 30817, 5045, 1991, 2591, 8530, 566, 1511, 4773, 290, 3082, 5046, 3678, 5657
INDOMETHACIN	C0021246	2.66409e-06	n/a	13	2.66246	155	CFD, ITGAM, LYST, DHRS9, ICAM1, PTGS1, ANXA1, PTGER2, PTGR1, ITGAX, PTGER4, STAT6, TNF	1675, 3684, 1130, 10170, 3383, 5742, 301, 5732, 22949, 3687, 5734, 6778, 7124
RECOMBINANT ALPHA CHEMOKINE	C1527035	6.4975e-06	n/a	13	2.88576	168	C5AR1, KITLG, CSF3R, PREX1, NLRC4, CXCL10, ICAM1, CXCL8, TCF4, P2RY2, BCL6, CCR7, MNDA	728, 4254, 1441, 57580, 58484, 3627, 3383, 3576, 6925, 5029, 604, 1236, 4332
ALLERGEN	C3274161	3.38558e-05	n/a	13	3.36672	196	TSC22D3, SLAMF6, EPX, IL1RL1, LYZ, ICAM1, CD86, CXCL8, YME1L1, GLO1, ANPEP, STAT6, CCR7	1831, 114836, 8288, 9173, 4069, 3383, 942, 3576, 10730, 2739, 290, 6778, 1236
DINOPROSTONE	C0012472	8.77861e-05	n/a	13	3.69309	215	C5AR1, FOSL2, FCGR1A, PTGS1, SLCO3A1, CXCL8, P2RY2, PTGER2, PTGER4, PTPRJ, HGF, CCR7, TNF	728, 2355, 2209, 5742, 28232, 3576, 5029, 5732, 5734, 5795, 3082, 1236, 7124
SERPINS	C0036764	0.000251318	n/a	13	4.10534	239	APOBEC3G, SERPINB1, IL1RL1, FURIN, ELANE, KLF6, ANXA1, PVR, TFR2, CTSG, ANXA3, PCSK6, PRTN3	60489, 1992, 9173, 5045, 1991, 1316, 301, 5817, 7036, 1511, 306, 5046, 5657
SODIUM BUTYRATE	C0142812	0.000504453	n/a	13	4.41453	257	RET, ITGA6, JUN, NFE2, LGALS1, ANXA1, GALNT3, HK1, SLCO3A1, TET1, ITGAX, VIM, TNFRSF10B	5979, 3655, 3725, 4778, 3956, 301, 2591, 3098, 28232, 80312, 3687, 7431, 8795
BLEOMYCIN	C0005740	0.00528025	n/a	13	5.75435	335	CD68, IL13RA1, FOSL2, ENTPD1, CXCL10, IL1RL1, ICAM1, DDIT3, NOG, CYP4V2, BCL6, GLO1, HGF	968, 3597, 2355, 953, 3627, 9173, 3383, 1649, 9241, 285440, 604, 2739, 3082
FUCOIDAN	C0060794	1.86214e-06	n/a	12	2.1815	127	CFD, NRP1, ITGAM, JUN, ICAM1, CD86, TFPI, CXCL8, AZU1, HGF, TNF, ITGA5	1675, 8829, 3684, 3725, 3383, 942, 7035, 3576, 566, 3082, 7124, 3678
SB 203580	C0297666	6.82726e-05	n/a	12	3.10907	181	CEBPA, ITGAM, JUN, HSPA1A, ICAM1, RETN, CXCL8, STAT6, HGF, TNF, CRIM1, TRIM69	1050, 3684, 3725, 3303, 3383, 56729, 3576, 6778, 3082, 7124, 51232, 140691
CHYMOTRYPSIN	C0008742	0.000120047	n/a	12	3.29802	192	C5AR1, CFD, SERPINB1, RAB27B, LYZ, FURIN, ELANE, HK1, PRSS57, CTSG, VIM, PRTN3	728, 1675, 1992, 5874, 4069, 5045, 1991, 3098, 400668, 1511, 7431, 5657
CYTOCHALASINS	C0010739	0.000981155	n/a	12	4.15687	242	AHNAK, ANTXR1, CR1, EPX, PREX1, ICAM1, PXN, PRSS57, CXCL8, VCL, VIM, ARRB1	79026, 84168, 1378, 8288, 57580, 3383, 5829, 400668, 3576, 7414, 7431, 408
TYROSINE	C0041485	0.00588858	n/a	12	5.17033	301	RET, C5AR1, SLAMF6, CSF3R, FCGR1A, PXN, LILRB1, IL6ST, TYROBP, PSTPIP2, PTPRJ, STAT6	5979, 728, 114836, 1441, 2209, 5829, 10859, 3572, 7305, 9050, 5795, 6778
BUDESONIDE	C0054201	2.19593e-06	n/a	11	1.83796	107	TSC22D3, CEBPA, KITLG, ITGAM, IL5RA, EPX, ICAM1, CXCL8, STAT6, IGLL1, TNF	1831, 1050, 4254, 3684, 3568, 8288, 3383, 3576, 6778, 3543, 7124
SERINE PROTEINASE INHIBITORS	C0036733	0.00012368	n/a	11	2.81706	164	LMNA, SERPINB1, FURIN, ELANE, TFPI, CD244, TMEM14A, CTSG, STAT6, HGF, PRTN3	4000, 1992, 5045, 1991, 7035, 51744, 28978, 1511, 6778, 3082, 5657
VITAMIN D3	C3265062	0.00019812	n/a	11	2.97165	173	KLF10, THEMIS2, ITGAM, TXNIP, RXRA, SLC2A3, P2RX7, ITGAX, NFATC2, CCR7, MNDA	7071, 9473, 3684, 10628, 6256, 6515, 5027, 3687, 4773, 1236, 4332
PREDNISOLONE	C0032950	0.000552312	n/a	11	3.34955	195	TSC22D3, C5AR1, ITGAM, CR1, MIR361, EPX, ENTPD1, ICAM1, IL6R, CXCL8, FCGR1B	1831, 728, 3684, 1378, 494323, 8288, 953, 3383, 3570, 3576, 2210
INTERFERON	C3652465	0.00105888	n/a	11	3.62438	211	APOBEC3G, TNFRSF10D, CXCL10, IL6ST, APOBEC3F, CXCL8, IFITM1, CD38, YME1L1, TNF, MNDA	60489, 8793, 3627, 3572, 200316, 3576, 8519, 952, 10730, 7124, 4332
INTERFERONS	C0021747	0.00105888	n/a	11	3.62438	211	APOBEC3G, TNFRSF10D, CXCL10, IL6ST, APOBEC3F, CXCL8, IFITM1, CD38, YME1L1, TNF, MNDA	60489, 8793, 3627, 3572, 200316, 3576, 8519, 952, 10730, 7124, 4332
RECOMBINANT INTERFERON	C1522537	0.00105888	n/a	11	3.62438	211	APOBEC3G, TNFRSF10D, CXCL10, IL6ST, APOBEC3F, CXCL8, IFITM1, CD38, YME1L1, TNF, MNDA	60489, 8793, 3627, 3572, 200316, 3576, 8519, 952, 10730, 7124, 4332
HUMAN LEUKOCYTE INTERFERON	C0733470	0.0011003	n/a	11	3.64156	212	APOBEC3G, TNFRSF10D, CXCL10, IL6ST, APOBEC3F, CXCL8, IFITM1, CD38, YME1L1, TNF, MNDA	60489, 8793, 3627, 3572, 200316, 3576, 8519, 952, 10730, 7124, 4332
ASPIRIN	C0004057	0.00148245	n/a	11	3.77898	220	ITGAM, ICAM1, PTGS1, ANXA1, RETN, ACSS2, HVCN1, STEAP3, CTSG, MIR223, STAT6	3684, 3383, 5742, 301, 56729, 55902, 84329, 55240, 1511, 407008, 6778
VP 16	C0733688	0.00364625	n/a	11	4.24276	247	CEBPA, KLF10, JUN, CBX5, CD82, DACH1, TP53BP2, TCF4, KLF7, STAT6, TNFRSF10B	1050, 7071, 3725, 23468, 3732, 1602, 7159, 6925, 8609, 6778, 8795
BORTEZOMIB	C1176309	0.00649267	n/a	11	4.5863	267	FAM46C, TNFRSF10D, HSPA1A, TP53BP2, DDIT3, SESN2, DDIT4, CD38, HES1, TNFRSF10B, HSPA1B	54855, 8793, 3303, 7159, 1649, 83667, 54541, 952, 3280, 8795, 3304
CYTOCHALASIN B	C0010737	6.24988e-06	n/a	10	1.66619	97	ITGAM, CR1, EPX, LYZ, ICAM1, PXN, CXCL8, SLC2A3, VCL, CTSG	3684, 1378, 8288, 4069, 3383, 5829, 3576, 6515, 7414, 1511
RECOMBINANT INTERFERON ALPHA INDUCIBLE PROTEIN 10	C1522712	8.22495e-06	n/a	10	1.71772	100	GBP2, CFD, CXCL10, ICAM1, RETN, CXCL8, CD244, HGF, CCR7, TNF	2634, 1675, 3627, 3383, 56729, 3576, 51744, 3082, 1236, 7124
BETA GLUCANS	C1134651	2.24757e-05	n/a	10	1.92384	112	ITGAM, TNFAIP2, CR1, LYZ, CD86, CXCL8, YME1L1, ANPEP, PTPRJ, TNF	3684, 7127, 1378, 4069, 942, 3576, 10730, 290, 5795, 7124
IBUPROFEN	C0020740	3.53862e-05	n/a	10	2.02691	118	LGALS1, ICAM1, PTGS1, PXN, CXCL8, PTGR1, STEAP3, PTGER4, TNF, TNFRSF10B	3956, 3383, 5742, 5829, 3576, 22949, 55240, 5734, 7124, 8795
SODIUM ARSENITE	C0074719	4.7143e-05	n/a	10	2.09561	122	JUN, HSPA1A, LGALS1, NLRC4, PXN, DDIT3, RXRA, BCL6, VCL, PCSK6	3725, 3303, 3956, 58484, 5829, 1649, 6256, 604, 7414, 5046
RECOMBINANT MACROPHAGE COLONY STIMULATING FACTOR	C1524095	0.00017862	n/a	10	2.45634	143	CEBPA, CD68, KITLG, ITGAM, FCGR1A, CXCL8, TYROBP, ITGAX, HGF, TNF	1050, 968, 4254, 3684, 2209, 3576, 7305, 3687, 3082, 7124
HEPATITIS B SURFACE ANTIGENS	C0019168	0.00207924	n/a	10	3.36672	196	CLC, APOBEC3G, CD68, CXCL10, FURIN, CD86, HLA-C, CD38, OAS3, HSPA1B	1178, 60489, 968, 3627, 5045, 942, 3107, 952, 4940, 3304
UROKINASE	C0042071	0.00215826	n/a	10	3.3839	197	CFD, SERPINB1, SAMD9L, FURIN, ELANE, KLF6, RETN, TFPI, CTSG, HGF	1675, 1992, 219285, 5045, 1991, 1316, 56729, 7035, 1511, 3082
CHONDROITIN SULFATES	C0008466	0.00215826	n/a	10	3.3839	197	LUM, NRP1, ADGRE2, LYZ, ELANE, PRSS57, NOG, HPSE, XYLT1, VIM	4060, 8829, 30817, 4069, 1991, 400668, 9241, 10855, 64131, 7431
CYCLOPHOSPHAMIDE	C0010583	0.00475202	n/a	10	3.77898	220	KITLG, TESMIN, CSF3R, LGALS1, DDIT3, CYP4V2, P2RX7, BCL6, ARNTL, PRTN3	4254, 9633, 1441, 3956, 1649, 285440, 5027, 604, 406, 5657
PROSTAGLANDINS	C0033554	0.00506055	n/a	10	3.81333	222	DHRS9, PTGS1, SLCO3A1, CXCL8, P2RY2, PTGER2, PTGR1, PTGER4, CCR7, TNF	10170, 5742, 28232, 3576, 5029, 5732, 22949, 5734, 1236, 7124
ARACHIDONATE 5 LIPOXYGENASE INHIBITORS	C1289971	1.25562e-07	n/a	9	0.841681	49	JUN, ICAM1, PTGS1, ELANE, ANXA1, VCL, LTA4H, TNF, TNFRSF10B	3725, 3383, 5742, 1991, 301, 7414, 4048, 7124, 8795
ALPHA 1 ANTITRYPSIN	C0002191	1.34604e-06	n/a	9	1.09934	64	CD68, SERPINB1, FURIN, ELANE, KLF6, PRSS57, CXCL8, CTSG, PRTN3	968, 1992, 5045, 1991, 1316, 400668, 3576, 1511, 5657
GLUCANS	C0017696	1.62027e-05	n/a	9	1.47724	86	GBP2, ITGAM, JUN, LYZ, ICAM1, CD86, CXCL8, GLO1, TNF	2634, 3684, 3725, 4069, 3383, 942, 3576, 2739, 7124
PROLINEDITHIOCARBAMATE	C0084183	2.80048e-05	n/a	9	1.5803	92	TNFRSF10D, JUN, ICAM1, CXCL8, DDIT4, HGF, TNF, ITGA5, HSPA1B	8793, 3725, 3383, 3576, 54541, 3082, 7124, 3678, 3304
TANSHINONE II A	C0897640	5.02967e-05	n/a	9	1.70054	99	ITGAM, JUN, ICAM1, DDIT3, NOG, XYLT1, P2RX7, TNF, TNFRSF10B	3684, 3725, 3383, 1649, 9241, 64131, 5027, 7124, 8795
MERBROMIN	C0025397	9.94571e-05	n/a	9	1.85513	108	CR1, FCGR1A, LYST, CD86, CD38, ITGAX, VCL, VIM, CCR7	1378, 2209, 1130, 942, 952, 3687, 7414, 7431, 1236
APROTININ	C0003641	0.000106814	n/a	9	1.87231	109	ITGAM, LYZ, ICAM1, FURIN, ELANE, TFPI, CXCL8, AZU1, CTSG	3684, 4069, 3383, 5045, 1991, 7035, 3576, 566, 1511
TOLONIUM CHLORIDE	C0040380	0.00014097	n/a	9	1.94102	113	LUM, C5AR1, CD68, KITLG, ITGAM, TCF4, VCL, VIM, ANPEP	4060, 728, 968, 4254, 3684, 6925, 7414, 7431, 290
BAPETA	C0043775	0.00019606	n/a	9	2.02691	118	NRP1, ITGAM, HSPA1A, CSF3R, IL1RL1, PRSS57, P2RY2, VCL, CTSG	8829, 3684, 3303, 1441, 9173, 400668, 5029, 7414, 1511
ALPROSTADIL	C0002335	0.000252091	n/a	9	2.09561	122	LYZ, ICAM1, CD86, SLCO3A1, CXCL8, PTGER2, PTGER4, HGF, TNF	4069, 3383, 942, 28232, 3576, 5732, 5734, 3082, 7124
BAICALEIN	C0052927	0.000302323	n/a	9	2.14715	125	FOSL2, LYZ, PTGS1, ANXA1, DDIT3, DDIT4, BNIP3, VCL, TNFRSF10B	2355, 4069, 5742, 301, 1649, 54541, 664, 7414, 8795
CELECOXIB	C0538927	0.000302323	n/a	9	2.14715	125	ICAM1, PTGS1, DDIT3, ZEB1, MIR29C, PTGER4, PTPRJ, SLC25A6, TNFRSF10B	3383, 5742, 1649, 6935, 407026, 5734, 5795, 293, 8795
ARA C	C0733521	0.000320801	n/a	9	2.16432	126	APOBEC3G, KITLG, JUN, CR1, TP53BP2, CD86, CRIM1, TNFRSF10B, ITGA5	60489, 4254, 3725, 1378, 7159, 942, 51232, 8795, 3678
PROTAMINES	C0033603	0.000360567	n/a	9	2.19868	128	ITGAM, LYZ, FURIN, TFPI, CXCL8, PVR, XYLT1, AZU1, HGF	3684, 4069, 5045, 7035, 3576, 5817, 64131, 566, 3082
CARRAGEENAN	C0007289	0.000504976	n/a	9	2.30174	134	NLRC4, ICAM1, PTGS1, ANXA1, HPSE, CXCL8, P2RX7, LTA4H, TNF	58484, 3383, 5742, 301, 10855, 3576, 5027, 4048, 7124
MINOCYCLINE	C0026187	0.00084926	n/a	9	2.47351	144	CD68, ITGAM, GPR65, TXNIP, TP53BP2, OAS3, NFATC2, TNF, PRTN3	968, 3684, 8477, 10628, 7159, 4940, 4773, 7124, 5657
RITUXIMAB	C0393022	0.00084926	n/a	9	2.47351	144	CD68, FCGR1A, TNFAIP3, IL6R, HLA-C, CD38, BCL6, TNF, PRTN3	968, 2209, 7128, 3570, 3107, 952, 604, 7124, 5657
PEPTIDOMIMETICS	C2936235	0.00103179	n/a	9	2.54222	148	C5AR1, NRP1, LGALS1, FURIN, ANXA1, PRSS57, BCL6, ANPEP, PCSK6	728, 8829, 3956, 5045, 301, 400668, 604, 290, 5046
DEOXYGLUCOSE	C0011501	0.00238118	n/a	9	2.86859	167	TXNIP, LGALS1, HK1, DDIT3, RETN, SESN2, DDIT4, SLC2A3, TNFRSF10B	10628, 3956, 3098, 1649, 56729, 83667, 54541, 6515, 8795
CHOLECALCIFEROL	C0008318	0.00437467	n/a	9	3.14342	183	THEMIS2, ITGAM, TXNIP, RXRA, SLC2A3, ITGAX, NFATC2, CCR7, MNDA	9473, 3684, 10628, 6256, 6515, 3687, 4773, 1236, 4332
IMMUNOLOGIC ADJUVANTS	C0001551	0.00486232	n/a	9	3.19495	186	ANTXR1, CR1, LYZ, CD86, HLA-C, CLEC12A, YME1L1, CCR7, PRTN3	84168, 1378, 4069, 942, 3107, 160364, 10730, 1236, 5657
BACTERICIDAL PERMEABILITY INCREASING PROTEIN	C0052897	8.34918e-07	n/a	8	0.772973	45	LYZ, ELANE, CXCL8, AZU1, BPI, CTSG, TLR6, PRTN3	4069, 1991, 3576, 566, 671, 1511, 10333, 5657
SODIUM SALICYLATE	C0037549	2.25722e-06	n/a	8	0.876036	51	HSPA1A, LGALS1, CXCL10, ICAM1, PTGS1, ANXA1, CD86, TNF	3303, 3956, 3627, 3383, 5742, 301, 942, 7124
REBAMIPIDE	C0069562	6.12779e-06	n/a	8	0.996276	58	CD68, ITGAM, ICAM1, CXCL8, P2RY2, PTGER4, HGF, TNF	968, 3684, 3383, 3576, 5029, 5734, 3082, 7124
INFLAMMATION MEDIATORS	C0243042	1.01898e-05	n/a	8	1.06498	62	CD68, CXCL10, ICAM1, ANXA1, RETN, CXCL8, CD38, TNF	968, 3627, 3383, 301, 56729, 3576, 952, 7124
ADENOSINE ETHYLCARBOXAMIDE 05 N	C0050789	1.15011e-05	n/a	8	1.08216	63	ITGAM, JUN, CXCL10, ICAM1, PXN, CD86, CXCL8, TNF	3684, 3725, 3627, 3383, 5829, 942, 3576, 7124
RECOMBINANT CYTOKINES	C1524094	1.82602e-05	n/a	8	1.15087	67	KITLG, CR1, EPX, LYZ, ICAM1, CXCL8, HLA-C, TNF	4254, 1378, 8288, 4069, 3383, 3576, 3107, 7124
POLYMYXIN B	C0032535	2.80813e-05	n/a	8	1.21958	71	CR1, HSPA1A, LYZ, CD86, CXCL8, P2RX7, BPI, TNF	1378, 3303, 4069, 942, 3576, 5027, 671, 7124
RICINUS COMMUNIS WHOLE EXTRACT	C3537211	3.44501e-05	n/a	8	1.25393	73	CD68, SLAMF6, ITGAM, ALDOC, LGALS1, PRSS57, CD86, VIM	968, 114836, 3684, 230, 3956, 400668, 942, 7431
CYSTEINYL LEUKOTRIENE	C0675175	6.12109e-05	n/a	8	1.357	79	KITLG, EPX, PTGS1, GGT5, CXCL8, ITGAX, LTA4H, LILRA2	4254, 8288, 5742, 2687, 3576, 3687, 4048, 11027
MANNANS	C0024727	0.000225506	n/a	8	1.63183	95	C5AR1, ITGAM, CR1, HLA-C, YME1L1, TNF, TLR6, MNDA	728, 3684, 1378, 3107, 10730, 7124, 10333, 4332
BISPECIFIC ANTIBODY	C0206492	0.000392306	n/a	8	1.76925	103	FCGR1A, CD300A, TFPI, LTBR, HLA-C, CD38, ANPEP, TNFRSF10B	2209, 11314, 7035, 4055, 3107, 952, 290, 8795
PROTEASE INHIBITORS	C0033607	0.000446772	n/a	8	1.8036	105	CEBPA, SERPINB1, LYZ, ELANE, CXCL8, CTSG, ITGA5, PRTN3	1050, 1992, 4069, 1991, 3576, 1511, 3678, 5657
TRIPTOLIDE	C0077274	0.00114102	n/a	8	2.07844	121	JUN, HSPA1A, CD86, CXCL8, NFATC2, CCR7, TNF, TNFRSF10B	3725, 3303, 942, 3576, 4773, 1236, 7124, 8795
HERBIMYCIN	C0062565	0.00172029	n/a	8	2.21585	129	RET, ITGA6, JUN, HSPA1A, FCGR1A, ICAM1, PXN, CXCL8	5979, 3655, 3725, 3303, 2209, 3383, 5829, 3576
METHYLPREDNISOLONE	C0025815	0.0019894	n/a	8	2.26739	132	CD68, ITGAM, HSPA1A, CXCL10, ICAM1, ANXA1, CXCL8, TNF	968, 3684, 3303, 3627, 3383, 301, 3576, 7124
GLYCOSIDE HYDROLASES	C0017976	0.00229064	n/a	8	2.31892	135	LUM, KITLG, CD82, LYZ, HPSE, HLA-C, CD38, TLE4	4060, 4254, 3732, 4069, 10855, 3107, 952, 7091
FENRETINIDE	C0060197	0.00251059	n/a	8	2.35327	137	TNFAIP3, DDIT3, RXRA, TMEM14A, BCL6, VIM, CCR7, TNFRSF10B	7128, 1649, 6256, 28978, 604, 7431, 1236, 8795
PROTEIN KINASE INHIBITORS	C1449702	0.00531867	n/a	8	2.66246	155	RET, JUN, ICAM1, IL6R, DDIT3, CXCL8, HGF, SLC25A6	5979, 3725, 3383, 3570, 1649, 3576, 3082, 293
SURAMIN	C0038880	0.00573839	n/a	8	2.69682	157	ENTPD1, PRSS57, NOG, HPSE, CD244, P2RY2, P2RX7, PRTN3	953, 400668, 9241, 10855, 51744, 5029, 5027, 5657
RECOMBINANT UROKINASE	C1522670	0.00689812	n/a	8	2.7827	162	C5AR1, ITGAM, SAMD9L, FURIN, ELANE, KLF6, CTSG, HGF	728, 3684, 219285, 5045, 1991, 1316, 1511, 3082
CERULETIDE	C0006639	0.00740859	n/a	8	2.81706	164	JUN, HSPA1A, IL1RL1, ICAM1, NOG, STAT6, HGF, HES1	3725, 3303, 9173, 3383, 9241, 6778, 3082, 3280
4 HYDROXY 2 NONENAL	C0048297	0.00794704	n/a	8	2.85141	166	CD68, JUN, SLC39A14, ICAM1, SLC2A3, PTGR1, CTSG, VIM	968, 3725, 23516, 3383, 6515, 22949, 1511, 7431
HYDROCORTISONE	C0020268	0.00822704	n/a	8	2.86859	167	TSC22D3, CFD, TESMIN, IGFBP2, ANXA1, MRAP2, STAR, ARNTL	1831, 1675, 9633, 3485, 301, 112609, 6770, 406
LUTEOLIN	C0065264	0.00973953	n/a	8	2.95447	172	JUN, TP53BP2, ICAM1, DDIT3, CXCL8, HGF, TNF, TNFRSF10B	3725, 7159, 3383, 1649, 3576, 3082, 7124, 8795
SIVELESTAT	C0130137	5.50709e-08	n/a	7	0.377898	22	CEBPA, CD68, ELANE, ANXA1, CXCL8, CTSG, TNF	1050, 968, 1991, 301, 3576, 1511, 7124
LIPOXYGENASE INHIBITORS	C0085385	1.79526e-06	n/a	7	0.601201	35	JUN, PTGS1, ANXA1, VCL, LTA4H, TNF, TNFRSF10B	3725, 5742, 301, 7414, 4048, 7124, 8795
PERITONEAL DIALYSIS SOLUTION	C0353714	1.79526e-06	n/a	7	0.601201	35	IL5RA, HSPA1A, LGALS1, ICAM1, CXCL8, TNF, HES1	3568, 3303, 3956, 3383, 3576, 7124, 3280
ANTI INFLAMMATORY AGENTS	C0003209	7.65566e-06	n/a	7	0.738618	43	CXCL10, DHRS9, ICAM1, PTGS1, CXCL8, LTA4H, TNF	3627, 10170, 3383, 5742, 3576, 4048, 7124
ELASTASE INHIBITOR	C0596481	1.21718e-05	n/a	7	0.79015	46	ITGAM, SERPINB1, ICAM1, ELANE, PRSS57, CTSG, PRTN3	3684, 1992, 3383, 1991, 400668, 1511, 5657
RECOMBINANT GRANULOCYTE COLONY STIMULATING FACTOR	C0376562	2.14281e-05	n/a	7	0.858858	50	KITLG, ITGAM, CSF3R, FCGR1A, ICAM1, CD38, ITGAX	4254, 3684, 1441, 2209, 3383, 952, 3687
PEONIFLORIN	C0070320	2.44779e-05	n/a	7	0.876036	51	CD68, ICAM1, CXCL8, BNIP3, PTGER2, STAT6, TNF	968, 3383, 3576, 664, 5732, 6778, 7124
OK 432	C0918027	4.04769e-05	n/a	7	0.944744	55	ITGAM, CXCL10, ICAM1, CD86, CXCL8, ITGAX, TNF	3684, 3627, 3383, 942, 3576, 3687, 7124
4 BETA AMINOETHYLBENZOLSULFOFLUORIDE	C0047895	7.16302e-05	n/a	7	1.03063	60	FURIN, ELANE, DDIT3, CXCL8, CTSG, TNF, PRTN3	5045, 1991, 1649, 3576, 1511, 7124, 5657
7 AMINOACTINOMYCIN D	C0049832	7.97476e-05	n/a	7	1.04781	61	ITGAM, CD82, CD86, HLA-C, CD38, HES1, ITGA5	3684, 3732, 942, 3107, 952, 3280, 3678
BETAMETHASONE	C0005308	7.97476e-05	n/a	7	1.04781	61	TSC22D3, CD68, EPX, APOBEC3D, CXCL8, SLC2A3, LNP1	1831, 968, 8288, 140564, 3576, 6515, 348801
TOSYLPHENYLALANYL CHLOROMETHYL KETONE	C0040498	0.000160072	n/a	7	1.16805	68	C5AR1, JUN, NLRC4, CXCL8, STAT6, TNF, PRTN3	728, 3725, 58484, 3576, 6778, 7124, 5657
RECOMBINANT FLT3 LIGAND	C1522457	0.000175578	n/a	7	1.18522	69	KITLG, CSF3R, CXCL10, IL6ST, CXCL8, HGF, TNF	4254, 1441, 3627, 3572, 3576, 3082, 7124
ACETYLMURAMYL ALANYL ISOGLUTAMINE	C0001060	0.000192275	n/a	7	1.2024	70	FCGR1A, CD86, CXCL8, YME1L1, ITGAX, TNF, TLR6	2209, 942, 3576, 10730, 3687, 7124, 10333
CALCIPOTRIENE	C0065767	0.000348543	n/a	7	1.32264	77	CD68, ITGA6, ICAM1, TNFAIP3, CXCL8, VIM, CCR7	968, 3655, 3383, 7128, 3576, 7431, 1236
LOW MOLECULAR WEIGHT HEPARIN	C0019139	0.00040814	n/a	7	1.357	79	EPX, TFPI, HPSE, AZU1, VIM, HGF, IGLL1	8288, 7035, 10855, 566, 7431, 3082, 3543
DIMETHYL FUMARATE	C0058218	0.000440849	n/a	7	1.37417	80	JUN, NFE2, CXCL10, ICAM1, CD86, CXCL8, TNF	3725, 4778, 3627, 3383, 942, 3576, 7124
ADALIMUMAB	C1122087	0.00068368	n/a	7	1.47724	86	CD68, FCGR1A, TNFAIP3, IL6R, RETN, ITGAX, TNF	968, 2209, 7128, 3570, 56729, 3687, 7124
FACTOR XIII	C0015528	0.00102214	n/a	7	1.5803	92	CD68, IL5RA, ELANE, TFPI, HPSE, MIR223, VIM	968, 3568, 1991, 7035, 10855, 407008, 7431
LIPOPEPTIDES	C2266975	0.00116029	n/a	7	1.61465	94	ICAM1, CD86, CXCL8, ITGAX, TUBA1A, TNF, TLR6	3383, 942, 3576, 3687, 7846, 7124, 10333
TELMISARTAN	C0248719	0.00131268	n/a	7	1.64901	96	CEBPA, CPT1A, TXNIP, ICAM1, HK1, RETN, HGF	1050, 1374, 10628, 3383, 3098, 56729, 3082
PEPSIN A	C0030909	0.00166416	n/a	7	1.71772	100	LUM, TP53BP2, LYZ, CXCL8, PVR, CTSG, ANPEP	4060, 7159, 4069, 3576, 5817, 1511, 290
MEPRIN	C0733413	0.00272131	n/a	7	1.87231	109	NRP1, JUN, FOSL2, FURIN, ELANE, CXCL8, ANPEP	8829, 3725, 2355, 5045, 1991, 3576, 290
EPOPROSTENOL	C0033567	0.00443238	n/a	7	2.04408	119	ENTPD1, PTGS1, TFPI, P2RY2, CTSG, PTGER4, HGF	953, 5742, 7035, 5029, 1511, 5734, 3082
MITOGEN ACTIVATED PROTEIN KINASE INHIBITOR	C1513344	0.00774172	n/a	7	2.26739	132	LMNA, JUN, LGALS1, DDIT3, CXCL8, CD38, HGF	4000, 3725, 3956, 1649, 3576, 952, 3082
SULFORAFAN	C0163159	0.00837939	n/a	7	2.30174	134	JUN, NFE2, NLRC4, ICAM1, ZEB1, SESN2, TNFRSF10B	3725, 4778, 58484, 3383, 6935, 83667, 8795
MONENSIN	C0026408	0.00976959	n/a	7	2.37045	138	C5AR1, ANTXR1, FURIN, PRSS57, CTSG, TNFRSF10B, ARRB1	728, 84168, 5045, 400668, 1511, 8795, 408
BACTERICIDE	C0004635	1.05718e-07	n/a	6	0.257658	15	LYZ, ANXA1, HLA-C, BPI, CTSG, PRTN3	4069, 301, 3107, 671, 1511, 5657
FILGRASTIM	C0210630	3.75526e-07	n/a	6	0.309189	18	KITLG, ITGAM, CSF3R, CD300A, ICAM1, DDIT3	4254, 3684, 1441, 11314, 3383, 1649
NEDOCROMIL SODIUM	C0886658	1.42485e-06	n/a	6	0.377898	22	KITLG, EPX, LYZ, ICAM1, CXCL8, TNF	4254, 8288, 4069, 3383, 3576, 7124
PYRROLIDINEDITHIOCARBAMATE	C1313719	4.15068e-06	n/a	6	0.446606	26	NRP1, JUN, ICAM1, CXCL8, MIR223, TNF	8829, 3725, 3383, 3576, 407008, 7124
FOSFOMYCIN	C0016610	5.26039e-06	n/a	6	0.463784	27	APOBEC3G, ITGAM, CXCL8, GLO1, HGF, TNF	60489, 3684, 3576, 2739, 3082, 7124
PROCATEROL	C0072032	6.59946e-06	n/a	6	0.480961	28	ITGAM, CXCL10, ICAM1, CXCL8, CD38, TNF	3684, 3627, 3383, 3576, 952, 7124
ALPHA,BETA METHYLENEADENOSINE 5' TRIPHOSPHATE	C0051285	2.16128e-05	n/a	6	0.584024	34	ITGAM, PROK2, ENTPD1, P2RY2, P2RX7, IGLL1	3684, 60675, 953, 5029, 5027, 3543
ZINC OXIDE	C0043491	2.57125e-05	n/a	6	0.601201	35	CEBPA, ICAM1, CXCL8, ARNTL, TNF, TLR6	1050, 3383, 3576, 406, 7124, 10333
VISCUM ALBUM PREPARATION	C1166209	6.53721e-05	n/a	6	0.704264	41	CD68, LGALS1, PXN, IL6R, IL6ST, TNF	968, 3956, 5829, 3570, 3572, 7124
RECOMBINANT INTERFERON GAMMA	C0021740	7.51834e-05	n/a	6	0.721441	42	FCGR1A, CXCL10, ICAM1, IFITM1, VCL, TNF	2209, 3627, 3383, 8519, 7414, 7124
SALMETEROL	C0073992	0.000111831	n/a	6	0.772973	45	ITGAM, EPX, CXCL10, ELANE, CXCL8, STAT6	3684, 8288, 3627, 1991, 3576, 6778
SU 5416	C0762592	0.000111831	n/a	6	0.772973	45	RET, KITLG, LYST, DDIT3, LTA4H, CRIM1	5979, 4254, 1130, 1649, 4048, 51232
PHENYLMETHYLSULFONYL FLUORIDE	C0031493	0.000203129	n/a	6	0.858858	50	C5AR1, CR1, ELANE, CD244, CTSG, PRTN3	728, 1378, 1991, 51744, 1511, 5657
BUTEIN	C0054245	0.000345043	n/a	6	0.944744	55	JUN, ICAM1, IL6ST, CXCL8, TNF, TNFRSF10B	3725, 3383, 3572, 3576, 7124, 8795
RECOMBINANT INTERLEUKIN 4	C1522540	0.000380974	n/a	6	0.961921	56	ICAM1, CD86, NOG, IFITM1, ANPEP, TNF	3383, 942, 9241, 8519, 290, 7124
TOFACITINIB	C2930696	0.000419766	n/a	6	0.979099	57	ITGAM, CXCL10, CD86, NOG, CXCL8, TNF	3684, 3627, 942, 9241, 3576, 7124
MYXOVIRUS RESISTANCE PROTEINS	C0072378	0.000506554	n/a	6	1.01345	59	APOBEC3G, CD68, LMNA, CXCL10, ANXA1, APOBEC3F	60489, 968, 4000, 3627, 301, 200316
OSTHOL	C0069679	0.000606702	n/a	6	1.04781	61	CPT1A, NOG, CXCL8, ANPEP, HGF, TNF	1374, 9241, 3576, 290, 3082, 7124
CYCLOOXYGENASE 2 INHIBITORS	C1257954	0.000606702	n/a	6	1.04781	61	PTGS1, MIR29C, PTGER4, PTPRJ, HGF, ITGA5	5742, 407026, 5734, 5795, 3082, 3678
THROMBIN INHIBITORS	C2746042	0.000606702	n/a	6	1.04781	61	C5AR1, CR1, SERPINB1, ELANE, TFPI, CTSG	728, 1378, 1992, 1991, 7035, 1511
TETRAMETHYLPYRAZINE	C0076305	0.000662207	n/a	6	1.06498	62	KITLG, ICAM1, BNIP3, PTGER4, TNF, ITGA5	4254, 3383, 664, 5734, 7124, 3678
HIRUDIN	C0019573	0.000721565	n/a	6	1.08216	63	ENTPD1, CD86, TFPI, HVCN1, CTSG, VIM	953, 942, 7035, 84329, 1511, 7431
LEVAMISOLE	C0023556	0.000721565	n/a	6	1.08216	63	ENTPD1, LYZ, ICAM1, CXCL8, TNF, PRTN3	953, 4069, 3383, 3576, 7124, 5657
NS398	C1567346	0.000721565	n/a	6	1.08216	63	CD82, CXCL10, PTGS1, PTGER4, HGF, ITGA5	3732, 3627, 5742, 5734, 3082, 3678
HIRUDINS	C1451270	0.000721565	n/a	6	1.08216	63	ENTPD1, CD86, TFPI, HVCN1, CTSG, VIM	953, 942, 7035, 84329, 1511, 7431
HYALURONATE	C0178695	0.000852562	n/a	6	1.11652	65	SLC9A7, ITGA6, ICAM1, HLA-C, CD38, ITGA5	84679, 3655, 3383, 3107, 952, 3678
CHONDROITIN 4 SULFATE	C0086008	0.00168297	n/a	6	1.27111	74	NRP1, PROK2, ICAM1, HPSE, HLA-C, VIM	8829, 60675, 3383, 10855, 3107, 7431
BRYOSTATIN 1	C0054173	0.00193059	n/a	6	1.30546	76	APOBEC3G, ITGAM, KLF6, VCL, DSG2, TNF	60489, 3684, 1316, 7414, 1829, 7124
BISINDOLYLMALEIMIDE I	C0091914	0.00206428	n/a	6	1.32264	77	ITGAM, JUN, CD244, P2RY2, NFATC2, PRTN3	3684, 3725, 51744, 5029, 4773, 5657
ALLOPURINOL	C0002144	0.00206428	n/a	6	1.32264	77	TXNIP, ICAM1, P2RX7, VCL, IGLL1, TNFRSF10B	10628, 3383, 5027, 7414, 3543, 8795
MATRINE	C0065751	0.00235252	n/a	6	1.357	79	HSPA1A, ICAM1, IFITM1, BCL6, HGF, TNF	3303, 3383, 8519, 604, 3082, 7124
NARINGIN	C0068451	0.00235252	n/a	6	1.357	79	JUN, HSPA1A, ICAM1, CXCL8, P2RX7, TNF	3725, 3303, 3383, 3576, 5027, 7124
URSOLIC ACID	C0077938	0.00250751	n/a	6	1.37417	80	JUN, ELANE, DDIT3, RETN, NOG, STAT6	3725, 1991, 1649, 56729, 9241, 6778
CARNOSINE	C0007267	0.00267006	n/a	6	1.39135	81	HSPA1A, ELANE, NOG, CXCL8, P2RX7, VIM	3303, 1991, 9241, 3576, 5027, 7431
OXOPHENYLARSINE	C0069795	0.00284038	n/a	6	1.40853	82	ITGAM, DNM1, FCGR1A, PXN, UBE2E3, ARRB1	3684, 1759, 2209, 5829, 10477, 408
GROWTH INHIBITORS	C0018282	0.00301871	n/a	6	1.4257	83	LUM, NRP1, LGALS1, IGFBP2, KLF6, HGF	4060, 8829, 3956, 3485, 1316, 3082
CORDYCEPIN	C0056331	0.00301871	n/a	6	1.4257	83	JUN, DDIT3, MIR33B, ZEB1, NFATC2, TNF	3725, 1649, 693120, 6935, 4773, 7124
THIAZOLIDINEDIONES	C1257987	0.00320527	n/a	6	1.44288	84	CEBPA, CFD, NRP1, LMNA, CXCL10, RETN	1050, 1675, 8829, 4000, 3627, 56729
COBALTOUS CHLORIDE	C0056036	0.00340031	n/a	6	1.46006	85	TESMIN, JUN, ALDOC, HPSE, DDIT4, MIR29C	9633, 3725, 230, 10855, 54541, 407026
2,4 THIAZOLIDINEDIONE	C0289779	0.00360404	n/a	6	1.47724	86	CEBPA, CFD, NRP1, LMNA, CXCL10, RETN	1050, 1675, 8829, 4000, 3627, 56729
ADENINE NUCLEOTIDES	C0001413	0.00360404	n/a	6	1.47724	86	TXNIP, LYST, ENTPD1, P2RY2, P2RX7, SLC25A6	10628, 1130, 953, 5029, 5027, 293
CHRYSIN	C0055661	0.00426978	n/a	6	1.52877	89	KITLG, IL6R, IL6ST, VIM, TNF, TNFRSF10B	4254, 3570, 3572, 7431, 7124, 8795
RIBOFLAVIN	C0035527	0.00451065	n/a	6	1.54595	90	CLC, APOBEC3D, LYZ, CLDN12, CD244, TLR6	1178, 140564, 4069, 9069, 51744, 10333
SALICYLATE	C0036075	0.00529345	n/a	6	1.59748	93	JUN, HSPA1A, PTGS1, SLC16A3, STAT6, TNF	3725, 3303, 5742, 9123, 6778, 7124
SALICYLATES	C0036077	0.00529345	n/a	6	1.59748	93	JUN, HSPA1A, PTGS1, SLC16A3, STAT6, TNF	3725, 3303, 5742, 9123, 6778, 7124
NITRITE ION	C3848529	0.00557523	n/a	6	1.61465	94	DNM1, EPX, ICAM1, RETN, CXCL8, TNF	1759, 8288, 3383, 56729, 3576, 7124
CATECHIN	C0007404	0.00586782	n/a	6	1.63183	95	ITGAM, JUN, PTGS1, ELANE, KLF7, YME1L1	3684, 3725, 5742, 1991, 8609, 10730
OVARIAN HORMONE	C0729511	0.00617146	n/a	6	1.64901	96	LUM, IGFBP2, PXN, RETN, STAR, SLC2A3	4060, 3485, 5829, 56729, 6770, 6515
MATRIX METALLOPROTEINASE INHIBITORS	C1513016	0.00648638	n/a	6	1.66619	97	LUM, CD82, FURIN, ANPEP, HGF, TNF	4060, 3732, 5045, 290, 3082, 7124
INFLIXIMAB	C0666743	0.00750118	n/a	6	1.71772	100	FCGR1A, CXCL10, TNFAIP3, RETN, TNF, PRTN3	2209, 3627, 7128, 56729, 7124, 5657
PENICILLIN	C0220892	0.00786357	n/a	6	1.73489	101	LACTB, LYZ, CXCL8, IFITM1, HLA-C, GLO1	114294, 4069, 3576, 8519, 3107, 2739
PENICILLINS	C0030842	0.00786357	n/a	6	1.73489	101	LACTB, LYZ, CXCL8, IFITM1, HLA-C, GLO1	114294, 4069, 3576, 8519, 3107, 2739
BENZYLOXYCARBONYLVALYL ALANYL ASPARTYL FLUOROMETHYL KETONE	C0383779	0.0082384	n/a	6	1.75207	102	LUM, LMNA, CCNA1, PXN, TNF, CRIM1	4060, 4000, 8900, 5829, 7124, 51232
PARTHENOLIDE	C0070126	0.0082384	n/a	6	1.75207	102	HSPA1A, ICAM1, DDIT3, CXCL8, STAT6, TNFRSF10B	3303, 3383, 1649, 3576, 6778, 8795
LYCOPENE	C0065331	0.0082384	n/a	6	1.75207	102	EPX, ICAM1, IGFBP2, DDIT3, RETN, STAR	8288, 3383, 3485, 1649, 56729, 6770
CILOSTAZOL	C0055729	0.00943982	n/a	6	1.8036	105	ITGAM, NFE2, ICAM1, ACSS2, HGF, TNF	3684, 4778, 3383, 55902, 3082, 7124
HA 1A	C0120659	7.68327e-08	n/a	5	0.137417	8	CR1, ICAM1, CXCL8, BPI, TNF	1378, 3383, 3576, 671, 7124
MAPRACORAT	C3252363	7.48053e-06	n/a	5	0.292012	17	JUN, EPX, ICAM1, CXCL8, TNF	3725, 8288, 3383, 3576, 7124
DEFIBROTIDE	C0057257	1.79692e-05	n/a	5	0.343543	20	ICAM1, TFPI, HPSE, CTSG, TNF	3383, 7035, 10855, 1511, 7124
ONO 1301	C0538030	5.74064e-05	n/a	5	0.429429	25	ICAM1, CD86, PTGER2, PTGER4, HGF	3383, 942, 5732, 5734, 3082
CORM 2	C1120350	8.48167e-05	n/a	5	0.463784	27	ITGAM, TXNIP, ICAM1, PTGS1, TNF	3684, 10628, 3383, 5742, 7124
WEB 2086	C0078460	0.000121319	n/a	5	0.498138	29	ITGAM, ICAM1, IL6R, CXCL8, TNF	3684, 3383, 3570, 3576, 7124
NIACINAMIDE	C0028027	0.000143559	n/a	5	0.515315	30	CEBPA, CSF3R, CD38, BCL6, TNF	1050, 1441, 952, 604, 7124
INDO 1	C0063477	0.000197262	n/a	5	0.549669	32	ITGAM, EPX, FCGR1A, ITGAX, CTSG	3684, 8288, 2209, 3687, 1511
NINTEDANIB	C2930789	0.000229318	n/a	5	0.566847	33	RET, JUN, IGFBP2, ZEB1, ITGA5	5979, 3725, 3485, 6935, 3678
LAMINARAN	C0064631	0.000265128	n/a	5	0.584024	34	ITGAM, LYZ, HPSE, CXCL8, TNF	3684, 4069, 10855, 3576, 7124
MK 886	C0128640	0.000305029	n/a	5	0.601201	35	ITGAM, PTGS1, CXCL8, LTA4H, TNF	3684, 5742, 3576, 4048, 7124
KETOROLAC	C0073631	0.00034932	n/a	5	0.618378	36	PTGS1, ANXA1, CXCL8, PTGER4, STAT6	5742, 301, 3576, 5734, 6778
CEFOTAXIME	C0007554	0.00034932	n/a	5	0.618378	36	CR1, LGALS1, LILRB1, CXCL8, LILRA2	1378, 3956, 10859, 3576, 11027
SODIUM DODECYL SULFATE	C0037506	0.000398308	n/a	5	0.635555	37	FCGR1A, ICAM1, CD86, CXCL8, STAT6	2209, 3383, 942, 3576, 6778
PURINERGIC P1 RECEPTOR AGONISTS	C2917322	0.000452308	n/a	5	0.652732	38	C5AR1, ITGAM, ENTPD1, P2RY2, TNF	728, 3684, 953, 5029, 7124
ALLOGENEIC LYMPHOCYTES	C0879438	0.000511643	n/a	5	0.66991	39	FCGR1A, ICAM1, CD86, LILRB1, TNF	2209, 3383, 942, 10859, 7124
INTRAVESICAL BCG	C1289970	0.000576646	n/a	5	0.687087	40	GBP2, CXCL10, ICAM1, CXCL8, TNF	2634, 3627, 3383, 3576, 7124
ABATACEPT	C1619966	0.00121955	n/a	5	0.807327	47	TNFAIP3, IL6R, CD86, CCR7, TNF	7128, 3570, 942, 1236, 7124
RADIOIMMUNOCONJUGATES	C0243019	0.00134258	n/a	5	0.824504	48	EPX, LGALS1, ICAM1, HLA-C, PRTN3	8288, 3956, 3383, 3107, 5657
ITF 2357	C1571394	0.00161578	n/a	5	0.858858	50	IL6R, IL6ST, P2RX7, ANPEP, TNF	3570, 3572, 5027, 290, 7124
GLIOTOXIN	C0017641	0.00161578	n/a	5	0.858858	50	ICAM1, CXCL8, VIM, HGF, TNF	3383, 3576, 7431, 3082, 7124
ALLICIN	C0051200	0.00161578	n/a	5	0.858858	50	CD68, CXCL10, ICAM1, CXCL8, TNF	968, 3627, 3383, 3576, 7124
FLUTICASONE	C0082607	0.00192775	n/a	5	0.893213	52	TSC22D3, CXCL10, CXCL8, CD38, TNF	1831, 3627, 3576, 952, 7124
PIROXICAM	C0031990	0.00209925	n/a	5	0.91039	53	ITGAM, JUN, CR1, PTGS1, ITGAX	3684, 3725, 1378, 5742, 3687
NS 398	C0215737	0.00228162	n/a	5	0.927567	54	PTGS1, CXCL8, PTGER2, PTGER4, HGF	5742, 3576, 5732, 5734, 3082
CAP18 LIPOPOLYSACCHARIDE BINDING PROTEIN	C0108282	0.00228162	n/a	5	0.927567	54	CD68, CR1, LYZ, CXCL8, PRTN3	968, 1378, 4069, 3576, 5657
TRANS RESVERATROL	C1101322	0.00228162	n/a	5	0.927567	54	EPX, TXNIP, PTGS1, GLO1, HGF	8288, 10628, 5742, 2739, 3082
DIALYSIS SOLUTIONS	C0011947	0.00247525	n/a	5	0.944744	55	ITGAM, CXCL8, GLO1, TNF, ITGA5	3684, 3576, 2739, 7124, 3678
EFAVIRENZ	C0674428	0.00289789	n/a	5	0.979099	57	CEBPA, ITGAM, SLCO3A1, CD38, ITGAX	1050, 3684, 28232, 952, 3687
CAFFEIC ACID	C0054433	0.00289789	n/a	5	0.979099	57	PTGS1, RETN, CXCL8, HGF, IGLL1	5742, 56729, 3576, 3082, 3543
EGG LYSOZYME	C4040986	0.0031277	n/a	5	0.996276	58	LYZ, GGT5, IL6ST, IFI30, GLO1	4069, 2687, 3572, 10437, 2739
PAMIDRONATE	C0043603	0.0031277	n/a	5	0.996276	58	CD86, LTBR, MIR223, ANPEP, TNF	942, 4055, 407008, 290, 7124
OMPTIN	C0285969	0.0031277	n/a	5	0.996276	58	IGFBP2, FURIN, ELANE, PRSS57, TFPI	3485, 5045, 1991, 400668, 7035
NIGERICIN	C0028076	0.00362625	n/a	5	1.03063	60	NLRC4, P2RX7, VCL, VIM, TNFRSF10B	58484, 5027, 7414, 7431, 8795
TRANILAST	C0146337	0.0038958	n/a	5	1.04781	61	KITLG, NRP1, TXNIP, S100A13, VCL	4254, 8829, 10628, 6284, 7414
EDELFOSINE	C0044549	0.0038958	n/a	5	1.04781	61	JUN, CD82, HSPA1A, DDIT3, TNFRSF10B	3725, 3732, 3303, 1649, 8795
ERYTHROPOIETIN	C0014822	0.00447846	n/a	5	1.08216	63	KITLG, IL13RA1, CSF3R, IL6R, IL6ST	4254, 3597, 1441, 3570, 3572
CIGLITAZONE	C0055721	0.00479145	n/a	5	1.09934	64	CFD, CXCL10, ICAM1, RXRA, CXCL8	1675, 3627, 3383, 6256, 3576
RHEIN	C0073177	0.00511967	n/a	5	1.11652	65	JUN, IL6R, DDIT3, CD38, P2RX7	3725, 3570, 1649, 952, 5027
SULINDAC SULFIDE	C0075615	0.0054635	n/a	5	1.13369	66	JUN, PTGS1, PTGER4, LTA4H, TNFRSF10B	3725, 5742, 5734, 4048, 8795
SULFASALAZINE	C0036078	0.00619956	n/a	5	1.16805	68	ICAM1, HPSE, CXCL8, PTGER4, TNF	3383, 10855, 3576, 5734, 7124
ILOPROST	C0079594	0.00659254	n/a	5	1.18522	69	ICAM1, PTGS1, CD86, PTGER4, TNF	3383, 5742, 942, 5734, 7124
IMMUNE SERA	C0020960	0.00659254	n/a	5	1.18522	69	ITGA6, FCGR1A, ANXA3, TNF, ITGA5	3655, 2209, 306, 7124, 3678
NELFINAVIR	C0525005	0.00659254	n/a	5	1.18522	69	CEBPA, LMNA, DDIT3, SESN2, TNFRSF10B	1050, 4000, 1649, 83667, 8795
PROTEIN SYNTHESIS INHIBITORS	C0033671	0.00700266	n/a	5	1.2024	70	JUN, PROK2, IL6ST, APOBEC3F, TNF	3725, 60675, 3572, 200316, 7124
PYRROLIDINE DITHIOCARBAMATE	C0163305	0.00743029	n/a	5	1.21958	71	TNFRSF10D, JUN, ICAM1, CXCL8, TNF	8793, 3725, 3383, 3576, 7124
MONOPHOSPHORYL LIPID A	C0066776	0.00743029	n/a	5	1.21958	71	CD86, YME1L1, ITGAX, TNF, TLR6	942, 10730, 3687, 7124, 10333
CLODRONATE	C0162357	0.00787579	n/a	5	1.23676	72	ITGAM, ICAM1, IL6ST, ITGAX, TNF	3684, 3383, 3572, 3687, 7124
CLARITHROMYCIN	C0055856	0.00932312	n/a	5	1.28829	75	JUN, TNFAIP2, HPSE, CXCL8, TNF	3725, 7127, 10855, 3576, 7124
SILYMARIN	C0037135	0.00984368	n/a	5	1.30546	76	CD68, ITGAM, KLF6, DDIT4, TNF	968, 3684, 1316, 54541, 7124
ICI 200355	C0123089	2.8494e-06	n/a	4	0.12024	7	LYZ, ELANE, CTSG, PRTN3	4069, 1991, 1511, 5657
ONO 5046	C0133951	1.64108e-05	n/a	4	0.171772	10	ICAM1, ELANE, CTSG, PRTN3	3383, 1991, 1511, 5657
ISOACTEOSIDE	C0641716	5.36646e-05	n/a	4	0.223303	13	ICAM1, CD86, CXCL8, TNF	3383, 942, 3576, 7124
CYL 26Z	C1613957	5.36646e-05	n/a	4	0.223303	13	ITGAM, LYZ, ICAM1, TNF	3684, 4069, 3383, 7124
CP 105696	C0289246	5.36646e-05	n/a	4	0.223303	13	KITLG, ITGAM, EPX, CXCL8	4254, 3684, 8288, 3576
RWJ 67657	C0910100	7.41204e-05	n/a	4	0.24048	14	ITGAM, ICAM1, CXCL8, TNF	3684, 3383, 3576, 7124
THENOYLTRIFLUOROACETONE	C0039757	7.41204e-05	n/a	4	0.24048	14	CPT1A, DDIT3, RETN, TNF	1374, 1649, 56729, 7124
TEPOXALIN	C0145162	9.97149e-05	n/a	4	0.257658	15	ITGAM, ICAM1, PTGS1, TNF	3684, 3383, 5742, 7124
RECOMBINANT GRANULOCYTE MACROPHAGE COLONY STIMULATING FACTORS	C0376563	0.000131167	n/a	4	0.274835	16	KITLG, ITGAM, ICAM1, ANPEP	4254, 3684, 3383, 290
URANYL ACETATE	C0077854	0.000214652	n/a	4	0.309189	18	FOSL2, HSPA1A, VIM, HGF	2355, 3303, 7431, 3082
SR 11237	C0254507	0.000214652	n/a	4	0.309189	18	ITGAM, CD86, HLA-C, TNFRSF10B	3684, 942, 3107, 8795
5 CHLOROMETHYLFLUORESCEIN DIACETATE	C0110185	0.000214652	n/a	4	0.309189	18	PLOD1, VCL, VIM, ANPEP	5351, 7414, 7431, 290
BORRELIDIN	C0053956	0.000268245	n/a	4	0.326366	19	CEBPA, KLF6, DDIT3, KLF7	1050, 1316, 1649, 8609
OLPRINONE	C0637063	0.000268245	n/a	4	0.326366	19	ICAM1, CXCL8, IGLL1, TNF	3383, 3576, 3543, 7124
POLAPREZINC	C0286382	0.000330809	n/a	4	0.343543	20	ITGAM, HSPA1A, CXCL8, TNF	3684, 3303, 3576, 7124
EPINASTINE	C0078442	0.000330809	n/a	4	0.343543	20	KITLG, ITGAM, ICAM1, CXCL8	4254, 3684, 3383, 3576
CILOMILAST	C0968887	0.000330809	n/a	4	0.343543	20	ITGAM, CXCL10, CXCL8, TNF	3684, 3627, 3576, 7124
ADSORBENTS	C0350056	0.000403168	n/a	4	0.360721	21	CR1, LYZ, CTSG, TNF	1378, 4069, 1511, 7124
KH 1060	C0167620	0.000403168	n/a	4	0.360721	21	ITGAM, CD86, RXRA, TNF	3684, 942, 6256, 7124
SHETA2	C1260101	0.000486157	n/a	4	0.377898	22	CEBPA, DDIT3, TNF, TNFRSF10B	1050, 1649, 7124, 8795
SC 236	C0767382	0.000580622	n/a	4	0.395075	23	KITLG, JUN, PTGS1, PTGER4	4254, 3725, 5742, 5734
RECOMBINANT HUMAN GRANULOCYTE COLONY STIMULATING FACTOR	C1271481	0.000580622	n/a	4	0.395075	23	KITLG, ITGAM, CSF3R, FCGR1A	4254, 3684, 1441, 2209
METHIONYLMETHYLSULFONIUM CHLORIDE	C0658922	0.000580622	n/a	4	0.395075	23	KITLG, CD38, ANPEP, ITGA5	4254, 952, 290, 3678
REACTIVE BLUE 2	C0140012	0.000687416	n/a	4	0.412252	24	ENTPD1, CXCL8, P2RY2, P2RX7	953, 3576, 5029, 5027
ADRENERGIC AGENTS	C0001637	0.000807398	n/a	4	0.429429	25	CFD, ITGAM, ICAM1, STAR	1675, 3684, 3383, 6770
CHYMOPAPAIN	C0008736	0.000807398	n/a	4	0.429429	25	CD38, CTSG, ANPEP, PRTN3	952, 1511, 290, 5657
DICLOFENAC SODIUM	C0700583	0.000807398	n/a	4	0.429429	25	PTGS1, ELANE, CXCL8, CTSG	5742, 1991, 3576, 1511
TENIDAP	C0076092	0.000807398	n/a	4	0.429429	25	PTGS1, CXCL8, P2RX7, TNF	5742, 3576, 5027, 7124
AZELASTINE	C0052762	0.000941428	n/a	4	0.446606	26	EPX, ICAM1, CXCL8, TNF	8288, 3383, 3576, 7124
CIS UROCANIC ACID	C3274548	0.000941428	n/a	4	0.446606	26	JUN, ICAM1, CXCL8, TNF	3725, 3383, 3576, 7124
FERUMOXIDES	C0246249	0.00125509	n/a	4	0.480961	28	ITGAM, APOBEC3D, HVCN1, HES1	3684, 140564, 84329, 3280
LAMBDA CARRAGEENAN	C0022971	0.00125509	n/a	4	0.480961	28	JUN, ICAM1, HPSE, TNF	3725, 3383, 10855, 7124
TAPI 1	C0294540	0.00143687	n/a	4	0.498138	29	IL6R, ELANE, CXCL8, TNF	3570, 1991, 3576, 7124
FK778	C1142717	0.00163584	n/a	4	0.515315	30	ICAM1, CD86, HLA-C, CCR7	3383, 942, 3107, 1236
BENZALKONIUM CHLORIDE	C0005026	0.00163584	n/a	4	0.515315	30	LGALS1, ICAM1, CD86, P2RX7	3956, 3383, 942, 5027
CC 4047	C1176324	0.00163584	n/a	4	0.515315	30	CEBPA, ITGAM, FCGR1A, TNF	1050, 3684, 2209, 7124
COOMASSIE BRILLIANT BLUE	C0056270	0.00163584	n/a	4	0.515315	30	ENTPD1, LYZ, P2RY2, P2RX7	953, 4069, 5029, 5027
TIGECYCLINE	C1260298	0.00163584	n/a	4	0.515315	30	ITGAM, CR1, TNF, HES1	3684, 1378, 7124, 3280
BOLDINE	C0053908	0.00163584	n/a	4	0.515315	30	CEBPA, CD68, LYZ, NOG	1050, 968, 4069, 9241
CEPHARANTHINE	C0055082	0.00185317	n/a	4	0.532492	31	TXNIP, HK1, CXCL8, TNF	10628, 3098, 3576, 7124
SERPIN SUPERFAMILY	C0036763	0.00208971	n/a	4	0.549669	32	SERPINB1, ELANE, CTSG, PRTN3	1992, 1991, 1511, 5657
CHYMOSTATIN	C0055676	0.00208971	n/a	4	0.549669	32	KITLG, EPX, ELANE, CTSG	4254, 8288, 1991, 1511
SESAMOL	C0074406	0.00208971	n/a	4	0.549669	32	CD68, ICAM1, RETN, TNF	968, 3383, 56729, 7124
RECOMBINANT HUMAN THROMBOPOIETIN	C0392939	0.00208971	n/a	4	0.549669	32	KITLG, NFE2, DDIT4, ANPEP	4254, 4778, 54541, 290
TAPI 2	C0389500	0.00208971	n/a	4	0.549669	32	FURIN, IL6R, TNF, HES1	5045, 3570, 7124, 3280
GLUCURONYL GLUCOSAMINE GLYCAN SULFATE	C0061450	0.00208971	n/a	4	0.549669	32	TFPI, HPSE, CTSG, HGF	7035, 10855, 1511, 3082
OPRELVEKIN	C0537670	0.00234631	n/a	4	0.566847	33	KITLG, LYZ, IL6ST, TNF	4254, 4069, 3572, 7124
LORATADINE	C0065180	0.00234631	n/a	4	0.566847	33	KITLG, CXCL10, ICAM1, CXCL8	4254, 3627, 3383, 3576
USTEKINUMAB	C1608841	0.00262379	n/a	4	0.584024	34	TNFAIP3, HLA-C, LTA4H, TNF	7128, 3107, 4048, 7124
CRANBERRY ALLERGENIC EXTRACT	C2740793	0.00262379	n/a	4	0.584024	34	CEBPA, JUN, ICAM1, CXCL8	1050, 3725, 3383, 3576
TOSYLLYSINE CHLOROMETHYL KETONE	C0040495	0.00262379	n/a	4	0.584024	34	NRP1, NLRC4, CXCL8, TNF	8829, 58484, 3576, 7124
CRANBERRY PREPARATION	C0453273	0.00262379	n/a	4	0.584024	34	CEBPA, JUN, ICAM1, CXCL8	1050, 3725, 3383, 3576
RECOMBINANT INTERLEUKIN 8	C1527432	0.00292297	n/a	4	0.601201	35	ITGAM, CXCL8, ITGAX, TNF	3684, 3576, 3687, 7124
ZIRCONIUM OXIDE	C0078814	0.00292297	n/a	4	0.601201	35	APOBEC3D, CXCL8, TNF, ITGA5	140564, 3576, 7124, 3678
IMMUNOGLOBULIN D	C0020843	0.00292297	n/a	4	0.601201	35	CSF3R, CD86, CD38, BCL6	1441, 942, 952, 604
OLOPATADINE	C0527189	0.00292297	n/a	4	0.601201	35	CXCL10, ICAM1, S100A13, TNF	3627, 3383, 6284, 7124
METYRAPONE	C0025876	0.00324466	n/a	4	0.618378	36	ITGA6, CR1, DHRS9, IGFBP2	3655, 1378, 10170, 3485
IMMUNOL	C1517844	0.00324466	n/a	4	0.618378	36	ITGAM, ENTPD1, CD86, TNF	3684, 953, 942, 7124
FLUORO JADE	C1097415	0.00395873	n/a	4	0.652732	38	CD68, FOSL2, DDIT3, VIM	968, 2355, 1649, 7431
AG 126	C0526815	0.00435265	n/a	4	0.66991	39	JUN, ICAM1, YME1L1, TNF	3725, 3383, 10730, 7124
ROFLUMILAST	C0965618	0.00435265	n/a	4	0.66991	39	KITLG, CXCL10, LTA4H, TNF	4254, 3627, 4048, 7124
AS 101	C0950716	0.00435265	n/a	4	0.66991	39	KITLG, IL6R, CD86, TNF	4254, 3570, 942, 7124
KETOTIFEN	C0022642	0.00435265	n/a	4	0.66991	39	EPX, CXCL10, LYZ, ICAM1	8288, 3627, 4069, 3383
RNA SYNTHESIS INHIBITORS	C0376567	0.00477217	n/a	4	0.687087	40	RXRA, RETN, CD38, PRTN3	6256, 56729, 952, 5657
PKH 26	C0137168	0.00477217	n/a	4	0.687087	40	KITLG, ITGAM, NOG, HLA-C	4254, 3684, 9241, 3107
MILRINONE	C0128513	0.00569093	n/a	4	0.721441	42	EPX, PDE7B, ENTPD1, TNF	8288, 27115, 953, 7124
COMPOUND 20	C0056212	0.00569093	n/a	4	0.721441	42	PTGS1, CD86, P2RX7, NFATC2	5742, 942, 5027, 4773
CASTANOSPERMINE	C0054849	0.00569093	n/a	4	0.721441	42	ENTPD1, ICAM1, IL6R, PRSS57	953, 3383, 3570, 400668
CUPRAMMONIUM CELLULOSE	C0056591	0.00619158	n/a	4	0.738618	43	ITGAM, ICAM1, ITGAX, TNF	3684, 3383, 3687, 7124
CATHELICIDIN LL 37	C3891304	0.00619158	n/a	4	0.738618	43	LYZ, ELANE, P2RX7, CTSG	4069, 1991, 5027, 1511
THEAFLAVIN	C0076379	0.00619158	n/a	4	0.738618	43	RET, JUN, ICAM1, CXCL8	5979, 3725, 3383, 3576
PENTOXIFYLLINE	C0030899	0.00619158	n/a	4	0.738618	43	ITGAM, ICAM1, CXCL8, TNF	3684, 3383, 3576, 7124
SODIUM SULFATE	C0074769	0.00619158	n/a	4	0.738618	43	ENTPD1, ICAM1, PVR, PTGER4	953, 3383, 5817, 5734
DIFFERENTIATION INHIBITOR	C1511940	0.00672065	n/a	4	0.755795	44	LUM, PCSK6, TNF, HES1	4060, 5046, 7124, 3280
ANTI ALLERGIC AGENTS	C0282555	0.00672065	n/a	4	0.755795	44	ICAM1, ANXA1, S100A13, P2RX7	3383, 301, 6284, 5027
GLYCYRRHETINIC ACID	C0017986	0.00727881	n/a	4	0.772973	45	DHRS9, CXCL8, CD244, GLO1	10170, 3576, 51744, 2739
CETIRIZINE	C0055147	0.00727881	n/a	4	0.772973	45	KITLG, EPX, ICAM1, CXCL8	4254, 8288, 3383, 3576
EDETIC ACID	C0013618	0.0078667	n/a	4	0.79015	46	SLAMF6, HSPA1A, LYZ, ANPEP	114836, 3303, 4069, 290
COLCEMIDE	C0813866	0.0078667	n/a	4	0.79015	46	PXN, VCL, PTGER4, VIM	5829, 7414, 5734, 7431
PIRFENIDONE	C0298067	0.0078667	n/a	4	0.79015	46	ICAM1, STAT6, HGF, TNF	3383, 6778, 3082, 7124
RH1 BENZOQUINONE	C0764430	0.0078667	n/a	4	0.79015	46	CD68, JUN, FAM134B, ITGA5	968, 3725, 54463, 3678
CICAPROST	C0055705	0.00848494	n/a	4	0.807327	47	PTGER4, STAT6, CCR7, TNF	5734, 6778, 1236, 7124
EFALIZUMAB	C1174995	0.00848494	n/a	4	0.807327	47	ITGAM, ICAM1, ITGAX, TNF	3684, 3383, 3687, 7124
ETHACRYNIC ACID	C0014963	0.00913413	n/a	4	0.824504	48	ITGAM, ENTPD1, LYZ, GLO1	3684, 953, 4069, 2739
9,10 ANTHRAQUINONE	C0050133	0.00913413	n/a	4	0.824504	48	LYZ, ELANE, P2RX7, CTSG	4069, 1991, 5027, 1511
PROTAMINE SULPHATE	C0033602	0.00913413	n/a	4	0.824504	48	KITLG, TFPI, PVR, HGF	4254, 7035, 5817, 3082
TOCILIZUMAB	C1609165	0.00913413	n/a	4	0.824504	48	TNFAIP3, IL6R, IL6ST, TNF	7128, 3570, 3572, 7124
RECOMBINANT FIBROBLAST GROWTH FACTOR 1	C1522455	0.00913413	n/a	4	0.824504	48	NRP1, HPSE, XYLT1, HGF	8829, 10855, 64131, 3082
WITHAFERIN A	C0078503	0.00981485	n/a	4	0.841681	49	KITLG, ICAM1, VIM, TNFRSF10B	4254, 3383, 7431, 8795
COMPOUND 48 80	C0009574	0.00981485	n/a	4	0.841681	49	C5AR1, KITLG, EPX, CXCL8	728, 4254, 8288, 3576
5 CHLORO 2 METHYL 4 ISOTHIAZOLIN 3 ONE	C0049104	1.96699e-05	n/a	3	0.0687087	4	ICAM1, CD86, TNF	3383, 942, 7124
PHOTOALLERGEN	C0440108	1.96699e-05	n/a	3	0.0687087	4	ICAM1, CD86, CXCL8	3383, 942, 3576
ONO 6818	C0963626	1.96699e-05	n/a	3	0.0687087	4	ITGAM, ELANE, CXCL8	3684, 1991, 3576
IMMLG5521	C3254304	4.87578e-05	n/a	3	0.0858858	5	ICAM1, CXCL8, TNF	3383, 3576, 7124
HAMAMELITANNIN	C0297195	4.87578e-05	n/a	3	0.0858858	5	ICAM1, ELANE, TNF	3383, 1991, 7124
LEUKADHERIN 1	C3851799	4.87578e-05	n/a	3	0.0858858	5	ITGAM, ICAM1, TNF	3684, 3383, 7124
PINANE	C0071079	4.87578e-05	n/a	3	0.0858858	5	PTGS1, CXCL8, TNF	5742, 3576, 7124
1,2,5 THIADIAZOLIDIN 3 ONE 1,1 DIOXIDE	C0966875	4.87578e-05	n/a	3	0.0858858	5	ELANE, CTSG, PRTN3	1991, 1511, 5657
TYRPHOSTIN AG 1288	C1519731	9.62721e-05	n/a	3	0.103063	6	ICAM1, RETN, TNF	3383, 56729, 7124
AH 13205	C0215899	9.62721e-05	n/a	3	0.103063	6	PTGER2, PTGER4, TNF	5732, 5734, 7124
TILMICOSIN	C0076681	0.000166325	n/a	3	0.12024	7	LYZ, CXCL8, TNF	4069, 3576, 7124
LIPOSOMAL CURCUMIN	C3898588	0.000262716	n/a	3	0.137417	8	TXNIP, CXCL8, TNF	10628, 3576, 7124
PROLASTIN	C0701947	0.000262716	n/a	3	0.137417	8	SERPINB1, CXCL8, TNF	1992, 3576, 7124
DIMEMORFAN	C0058193	0.000262716	n/a	3	0.137417	8	ITGAM, JUN, TNF	3684, 3725, 7124
FK 706	C0669496	0.000389027	n/a	3	0.154595	9	CXCL8, CTSG, TNF	3576, 1511, 7124
EMEDASTINE	C0064263	0.000389027	n/a	3	0.154595	9	ICAM1, CD86, CXCL8	3383, 942, 3576
NPC 15669	C0132918	0.000389027	n/a	3	0.154595	9	ITGAM, LYZ, CXCL8	3684, 4069, 3576
SAXATILIN	C1137277	0.000548956	n/a	3	0.171772	10	PXN, CXCL8, TNF	5829, 3576, 7124
Y 24180	C0149072	0.000548956	n/a	3	0.171772	10	ITGAM, EPX, ICAM1	3684, 8288, 3383
LASALOCID	C0023082	0.000745268	n/a	3	0.188949	11	EPX, DDIT3, TNFRSF10B	8288, 1649, 8795
CADEXOMER IODINE	C0054409	0.000745268	n/a	3	0.188949	11	LYZ, CXCL8, TNF	4069, 3576, 7124
PCB 104	C1453501	0.000745268	n/a	3	0.188949	11	JUN, ICAM1, CXCL8	3725, 3383, 3576
ASPERGILLUS FUMIGATUS EXTRACT	C1445421	0.000745268	n/a	3	0.188949	11	C5AR1, GGT5, CXCL8	728, 2687, 3576
DORNASE ALFA	C1135662	0.00098113	n/a	3	0.206126	12	ELANE, CXCL8, CTSG	1991, 3576, 1511
ALPHA TYPE 1 POLARIZED DENDRITIC CELLS	C1831973	0.00098113	n/a	3	0.206126	12	LILRB1, CCR7, TNF	10859, 1236, 7124
TAPROSTENE	C0075812	0.00098113	n/a	3	0.206126	12	TSC22D3, CXCL10, PTGER4	1831, 3627, 5734
MZM	C0721501	0.00098113	n/a	3	0.206126	12	CD86, LTBR, CCR7	942, 4055, 1236
PHENYL BUTYRATE	C3848590	0.00098113	n/a	3	0.206126	12	CEBPA, ITGAM, CSF3R	1050, 3684, 1441
SC 41930	C0074112	0.00098113	n/a	3	0.206126	12	C5AR1, ITGAM, LTA4H	728, 3684, 4048
CYCLOSPORIN H	C0056823	0.00098113	n/a	3	0.206126	12	C5AR1, ITGAM, ANXA1	728, 3684, 301
REPARIXIN	C1506748	0.00125936	n/a	3	0.223303	13	CD68, ITGAM, CXCL8	968, 3684, 3576
ISIS 2302	C3495448	0.00125936	n/a	3	0.223303	13	ICAM1, CD86, ITGAX	3383, 942, 3687
INDOLICIDIN	C0123515	0.00125936	n/a	3	0.223303	13	LYZ, BPI, TNF	4069, 671, 7124
METHYL SALICYLATE	C0066282	0.00125936	n/a	3	0.223303	13	ICAM1, CD86, VIM	3383, 942, 7431
MEDICARPIN	C0065857	0.00125936	n/a	3	0.223303	13	LYST, TNF, TNFRSF10B	1130, 7124, 8795
HARPAGOSIDE	C0062127	0.00158259	n/a	3	0.24048	14	RET, JUN, TNF	5979, 3725, 7124
SHOSAIKO TO	C1138004	0.00158259	n/a	3	0.24048	14	RET, HGF, TNF	5979, 3082, 7124
CV 3988	C0056625	0.00158259	n/a	3	0.24048	14	ICAM1, CXCL8, TNF	3383, 3576, 7124
ONO AE1 329	C1138034	0.00195328	n/a	3	0.257658	15	CD86, PTGER2, PTGER4	942, 5732, 5734
FLUNISOLIDE	C0060501	0.00195328	n/a	3	0.257658	15	JUN, ICAM1, TNF	3725, 3383, 7124
SOFALCONE	C0142971	0.00195328	n/a	3	0.257658	15	CXCL8, HGF, TNF	3576, 3082, 7124
FLUNIXIN MEGLUMINE	C0060503	0.00195328	n/a	3	0.257658	15	LYZ, PTGS1, TNF	4069, 5742, 7124
N DODECANE	C0067942	0.00237373	n/a	3	0.274835	16	ELANE, CXCL8, TNF	1991, 3576, 7124
ACETATE	C0000975	0.00237373	n/a	3	0.274835	16	LYZ, ELANE, TNF	4069, 1991, 7124
ASPHALT	C0052558	0.00237373	n/a	3	0.274835	16	JUN, LGALS1, TNFRSF10B	3725, 3956, 8795
ACETATES	C0000979	0.00237373	n/a	3	0.274835	16	LYZ, ELANE, TNF	4069, 1991, 7124
TAUROLIDINE	C0144567	0.00237373	n/a	3	0.274835	16	JUN, BPI, TNF	3725, 671, 7124
WEB 2170	C0085001	0.00237373	n/a	3	0.274835	16	CXCL8, HGF, TNF	3576, 3082, 7124
LORNOXICAM	C0055477	0.00237373	n/a	3	0.274835	16	ICAM1, PTGS1, CXCL8	3383, 5742, 3576
FLUORANTHENE	C0060514	0.00237373	n/a	3	0.274835	16	LMNA, APOBEC3D, ANXA1	4000, 140564, 301
GAMMA INTERFERON	C3539881	0.00284607	n/a	3	0.292012	17	CXCL10, IFITM1, HLA-C	3627, 8519, 3107
COMPSTATIN	C0673968	0.00284607	n/a	3	0.292012	17	C5AR1, CR1, VCL	728, 1378, 7414
PIDOTIMOD	C0081002	0.00284607	n/a	3	0.292012	17	CD86, CXCL8, TNF	942, 3576, 7124
HUMAN NEUTROPHIL PEPTIDE 1	C0122620	0.00284607	n/a	3	0.292012	17	AZU1, BPI, CTSG	566, 671, 1511
N METHYLFORMAMIDE	C0066373	0.00337229	n/a	3	0.309189	18	ITGA6, VCL, ITGA5	3655, 7414, 3678
AMINONUCLEOSIDE	C0085791	0.00337229	n/a	3	0.309189	18	PXN, VIM, TNF	5829, 7431, 7124
CARBOCYSTEINE	C0006992	0.00337229	n/a	3	0.309189	18	RASA4, CXCL8, TNF	10156, 3576, 7124
HEXAMINE SILVER	C0037128	0.00337229	n/a	3	0.309189	18	CD68, LYZ, VIM	968, 4069, 7431
OXATOMIDE	C0134337	0.00337229	n/a	3	0.309189	18	ICAM1, P2RY2, P2RX7	3383, 5029, 5027
AMETANTRONE	C0102923	0.00337229	n/a	3	0.309189	18	IL6R, CD244, TNF	3570, 51744, 7124
CREST	C2948667	0.00395419	n/a	3	0.326366	19	LYZ, VIM, HGF	4069, 7431, 3082
PLATONIN	C0137287	0.00395419	n/a	3	0.326366	19	JUN, BNIP3, TNF	3725, 664, 7124
CEP 11004	C1172647	0.00395419	n/a	3	0.326366	19	JUN, CXCL8, TNF	3725, 3576, 7124
BUTANE	C0006474	0.00395419	n/a	3	0.326366	19	LYZ, CD244, ANPEP	4069, 51744, 290
SUCCINIMIDE	C0075432	0.00395419	n/a	3	0.326366	19	ELANE, CTSG, PRTN3	1991, 1511, 5657
ACECLOFENAC	C0050403	0.00395419	n/a	3	0.326366	19	ITGAM, PTGS1, TNF	3684, 5742, 7124
HELENALIN	C0062169	0.00395419	n/a	3	0.326366	19	DDIT3, STAR, GLO1	1649, 6770, 2739
TETRAGASTRIN	C0039659	0.00395419	n/a	3	0.326366	19	CXCL8, IFITM1, GLO1	3576, 8519, 2739
TRP P 1	C0077413	0.00395419	n/a	3	0.326366	19	JUN, CXCL8, ANPEP	3725, 3576, 290
CORILAGIN	C0164514	0.00395419	n/a	3	0.326366	19	CXCL8, TNF, HES1	3576, 7124, 3280
CLEMASTINE	C0008929	0.00395419	n/a	3	0.326366	19	CD68, KITLG, P2RX7	968, 4254, 5027
OM 85 BV	C0163642	0.00459349	n/a	3	0.343543	20	ITGAM, IL6ST, CXCL8	3684, 3572, 3576
SUCCINIMIDES	C0038623	0.00459349	n/a	3	0.343543	20	ELANE, CTSG, PRTN3	1991, 1511, 5657
SR 11302	C0539455	0.00459349	n/a	3	0.343543	20	JUN, STAR, TNF	3725, 6770, 7124
ANTIPYRETICS	C0003419	0.00459349	n/a	3	0.343543	20	CXCL10, PTGS1, TNF	3627, 5742, 7124
IRRIGATION SOLUTIONS	C2746010	0.00459349	n/a	3	0.343543	20	LYZ, TFPI, TNF	4069, 7035, 7124
CALCIUM PHOSPHATE CRYSTALS	C0368819	0.0052917	n/a	3	0.360721	21	PTGS1, GALNT3, PTGER4	5742, 2591, 5734
POLYETHYLENE GLYCOL 8000	C0030776	0.0052917	n/a	3	0.360721	21	LYZ, HK1, QPRT	4069, 3098, 23475
SU 6668	C0970963	0.0052917	n/a	3	0.360721	21	RET, KITLG, PTGER2	5979, 4254, 5732
LIPOCALIN 1	C0078147	0.00605026	n/a	3	0.377898	22	CEBPA, LYZ, PNRC1	1050, 4069, 10957
MOLGRAMOSTIM	C0218633	0.00605026	n/a	3	0.377898	22	KITLG, ITGAM, FCGR1A	4254, 3684, 2209
GOLD SODIUM THIOMALATE	C0018034	0.00605026	n/a	3	0.377898	22	ICAM1, CXCL8, TNF	3383, 3576, 7124
MONOASPARTYL CHLORIN E6	C0245194	0.00605026	n/a	3	0.377898	22	ITGAM, JUN, DDIT3	3684, 3725, 1649
TALL 104	C1832043	0.00605026	n/a	3	0.377898	22	CD244, CD38, TNF	51744, 952, 7124
DIPIVEFRIN	C0058415	0.00605026	n/a	3	0.377898	22	LYZ, CXCL8, VIM	4069, 3576, 7431
HUMAN NEUTROPHIL PEPTIDE 2	C0122159	0.00605026	n/a	3	0.377898	22	AZU1, BPI, CTSG	566, 671, 1511
SODIUM IODATE	C0074742	0.00605026	n/a	3	0.377898	22	NOG, CXCL8, HGF	9241, 3576, 3082
ONC201	C3827072	0.00687043	n/a	3	0.395075	23	DDIT3, DDIT4, TNFRSF10B	1649, 54541, 8795
OLEANDRIN	C0069397	0.00687043	n/a	3	0.395075	23	JUN, CXCL8, TNF	3725, 3576, 7124
BONGKREKIC ACID	C0005982	0.00687043	n/a	3	0.395075	23	LGALS1, BNIP3, SLC25A6	3956, 664, 293
FR 167653	C0535734	0.00687043	n/a	3	0.395075	23	ICAM1, CXCL8, TNF	3383, 3576, 7124
NAFAMOSTAT MESILATE	C0207682	0.00687043	n/a	3	0.395075	23	ICAM1, TFPI, TNF	3383, 7035, 7124
SULPROSTONE	C0075628	0.00687043	n/a	3	0.395075	23	ICAM1, PTGER2, PTGER4	3383, 5732, 5734
RO 31 8425	C0140783	0.00687043	n/a	3	0.395075	23	ITGAM, HSPA1A, ICAM1	3684, 3303, 3383
ANGIOTENSIN II	C0003009	0.00687043	n/a	3	0.395075	23	IL1RL1, CD86, TNF	9173, 942, 7124
DAMNACANTHAL	C0212399	0.00687043	n/a	3	0.395075	23	PXN, TNF, TNFRSF10B	5829, 7124, 8795
COMPOUND 32	C0258113	0.00775338	n/a	3	0.412252	24	NRP1, CXCL10, HLA-C	8829, 3627, 3107
ECHINOMYCIN	C0013508	0.00775338	n/a	3	0.412252	24	CXCL8, DDIT4, SLC2A3	3576, 54541, 6515
ANTIMETASTATIC AGENT	C1516021	0.00775338	n/a	3	0.412252	24	LGALS1, HPSE, TNFRSF10B	3956, 10855, 8795
DALTEPARIN	C0206461	0.00775338	n/a	3	0.412252	24	TFPI, HPSE, HGF	7035, 10855, 3082
CMT 3	C2979988	0.00775338	n/a	3	0.412252	24	PTGS1, ELANE, TNF	5742, 1991, 7124
MANIDIPINE	C0065656	0.00775338	n/a	3	0.412252	24	JUN, ICAM1, CXCL8	3725, 3383, 3576
MURAMIDASE	C0026794	0.00870322	n/a	3	0.429429	25	CD68, LYZ, VIM	968, 4069, 7431
RHUBARB PREPARATION	C0304561	0.00870322	n/a	3	0.429429	25	LYZ, ICAM1, TNF	4069, 3383, 7124
MRS 2179	C0674169	0.00870322	n/a	3	0.429429	25	ENTPD1, P2RY2, P2RX7	953, 5029, 5027
CLI 095	C3179438	0.00870322	n/a	3	0.429429	25	ICAM1, CXCL8, TNF	3383, 3576, 7124
NF 449	C0670517	0.00870322	n/a	3	0.429429	25	ENTPD1, P2RY2, P2RX7	953, 5029, 5027
TERBINAFINE	C0076110	0.00870322	n/a	3	0.429429	25	CXCL10, PXN, CXCL8	3627, 5829, 3576
CCI 779	C0796512	0.00870322	n/a	3	0.429429	25	LMNA, JUN, NOG	4000, 3725, 9241
PYCNOGENOL	C0072642	0.00971557	n/a	3	0.446606	26	JUN, ICAM1, TNF	3725, 3383, 7124
4 COUMARIC ACID	C0048207	0.00971557	n/a	3	0.446606	26	ICAM1, IGLL1, TNF	3383, 3543, 7124
GALIXIMAB	C1098262	0.00971557	n/a	3	0.446606	26	CR1, ICAM1, CD86	1378, 3383, 942
PYCNOGENOLS	C1616563	0.00971557	n/a	3	0.446606	26	JUN, ICAM1, TNF	3725, 3383, 7124
XMD 8 92	C3252765	0.00971557	n/a	3	0.446606	26	ITGAM, ZEB1, BNIP3	3684, 6935, 664
LGD 1069	C0300770	0.00971557	n/a	3	0.446606	26	CFD, JUN, RXRA	1675, 3725, 6256
CECROPINS	C0597874	0.00971557	n/a	3	0.446606	26	LYZ, RXRA, BPI	4069, 6256, 671
DAK 16	C0112273	0.000293772	n/a	2	0.0343543	2	ELANE, CTSG	1991, 1511
FLECAINIDE ACETATE	C0086303	0.000293772	n/a	2	0.0343543	2	IFITM1, TNF	8519, 7124
1 PHENAZINECARBOXYLIC ACID	C0044583	0.000293772	n/a	2	0.0343543	2	ICAM1, CXCL8	3383, 3576
YM 47141	C0386137	0.000293772	n/a	2	0.0343543	2	ELANE, CTSG	1991, 1511
P 1507	C0297250	0.000293772	n/a	2	0.0343543	2	CXCL8, TNF	3576, 7124
REPANDOSIDE	C2934769	0.000293772	n/a	2	0.0343543	2	CXCL8, TNF	3576, 7124
KN 04	C0378618	0.000866309	n/a	2	0.0515315	3	P2RY2, P2RX7	5029, 5027
MUTEIN 6	C0538992	0.000866309	n/a	2	0.0515315	3	ICAM1, TNF	3383, 7124
L 658758	C0083171	0.000866309	n/a	2	0.0515315	3	ELANE, PRTN3	1991, 5657
BDPT	C0644698	0.000866309	n/a	2	0.0515315	3	CXCL8, TNF	3576, 7124
ASCARIDOLE	C0052466	0.000866309	n/a	2	0.0515315	3	ICAM1, CD86	3383, 942
AGRIMONIIN	C0050985	0.000866309	n/a	2	0.0515315	3	ELANE, CXCL8	1991, 3576
6 HYDROXY 2,4,7 TRIMETHOXYPHENANTHRENE	C3253438	0.000866309	n/a	2	0.0515315	3	CEBPA, CPT1A	1050, 1374
LIPEGFILGRASTIM	C3640212	0.000866309	n/a	2	0.0515315	3	CSF3R, ELANE	1441, 1991
TMI 1	C1456763	0.000866309	n/a	2	0.0515315	3	CXCL8, TNF	3576, 7124
HESPERIDIN METHYL CHALONE	C2350707	0.000866309	n/a	2	0.0515315	3	ICAM1, TNF	3383, 7124
MDL 101028	C0291761	0.000866309	n/a	2	0.0515315	3	ELANE, CTSG	1991, 1511
3' CHLORO 5,7 DIMETHOXYISOFLAVONE	C3491366	0.000866309	n/a	2	0.0515315	3	CXCL10, TNF	3627, 7124
RACTOPAMINE HYDROCHLORIDE	C0958044	0.00172278	n/a	2	0.0687087	4	APOBEC3D, DDIT3	140564, 1649
NITROFLURBIPROFEN	C0381496	0.00172278	n/a	2	0.0687087	4	PTGS1, TNF	5742, 7124
RECOMBINANT CTAP III	C1523977	0.00172278	n/a	2	0.0687087	4	HPSE, CXCL8	10855, 3576
POLUDAN	C0071336	0.00172278	n/a	2	0.0687087	4	CXCL8, TNF	3576, 7124
AM6 36	C3177627	0.00172278	n/a	2	0.0687087	4	RXRA, CD38	6256, 952
ISIS 2922	C0950924	0.00172278	n/a	2	0.0687087	4	ICAM1, CXCL8	3383, 3576
PROSOM	C0722865	0.00172278	n/a	2	0.0687087	4	FURIN, PCSK6	5045, 5046
RK I 123	C3714162	0.00172278	n/a	2	0.0687087	4	JUN, CXCL8	3725, 3576
POLYHEXAMETHYLENE BIGUANIDE	C0137794	0.00172278	n/a	2	0.0687087	4	LYZ, P2RX7	4069, 5027
ACETYL AMVSEFLKQAWIENEEQEYVVQTVK	C0382612	0.00172278	n/a	2	0.0687087	4	ICAM1, ANXA1	3383, 301
HWA 138	C0063039	0.00172278	n/a	2	0.0687087	4	CXCL8, TNF	3576, 7124
GLUTAMYL GLYCYL ARGINYL CHLOROMETHYL KETONE	C0252794	0.00172278	n/a	2	0.0687087	4	CXCL8, TNF	3576, 7124
GLYCYL PROLYL ARGININE	C0061724	0.00172278	n/a	2	0.0687087	4	ITGAX, TNF	3687, 7124
SANTONIN RELATED COMPOUND 2	C3657379	0.00172278	n/a	2	0.0687087	4	ICAM1, TNF	3383, 7124
PD 098063	C0533563	0.00172278	n/a	2	0.0687087	4	ICAM1, TNF	3383, 7124
RP 55778	C0140881	0.00172278	n/a	2	0.0687087	4	ICAM1, TNF	3383, 7124
RHESUS ROTAVIRUS VACCINE	C0140933	0.00172278	n/a	2	0.0687087	4	PRSS57, MIR29C	400668, 407026
ON09310	C2353771	0.00172278	n/a	2	0.0687087	4	DDIT3, TNFRSF10B	1649, 8795
AW00179	C3661253	0.00172278	n/a	2	0.0687087	4	JUN, TNFRSF10B	3725, 8795
IRFI 042	C0971022	0.00172278	n/a	2	0.0687087	4	ICAM1, TNF	3383, 7124
BIIL 284	C0972319	0.00172278	n/a	2	0.0687087	4	ITGAM, CXCL8	3684, 3576
GLIOVIRIN	C0061326	0.00172278	n/a	2	0.0687087	4	JUN, TNF	3725, 7124
NPB001 05	C3253929	0.00172278	n/a	2	0.0687087	4	JUN, DDIT3	3725, 1649
BB 2275	C0257712	0.00172278	n/a	2	0.0687087	4	CXCL8, TNF	3576, 7124
RO 23 9424	C0073515	0.00172278	n/a	2	0.0687087	4	CXCL8, TNF	3576, 7124
IMUNOFAN	C0379865	0.00172278	n/a	2	0.0687087	4	LYZ, TNF	4069, 7124
BVT173187	C3492858	0.00172278	n/a	2	0.0687087	4	C5AR1, CXCL8	728, 3576
BECLOMETHASONE 17 MONOPROPIONATE	C0081729	0.00172278	n/a	2	0.0687087	4	TSC22D3, CXCL8	1831, 3576
2 METHYL 4 ISOTHIAZOLIN 3 ONE	C0046343	0.00172278	n/a	2	0.0687087	4	ICAM1, CD86	3383, 942
ALPHA HEXYLCINNAMALDEHYDE	C2935868	0.00172278	n/a	2	0.0687087	4	ICAM1, CD86	3383, 942
FUSIDATE SODIUM	C0037509	0.00283852	n/a	2	0.0858858	5	CXCL8, TNF	3576, 7124
MALTOTETRAOSE	C0065615	0.00283852	n/a	2	0.0858858	5	ICAM1, TNF	3383, 7124
POLYMYXIN B SULFATE	C0001714	0.00283852	n/a	2	0.0858858	5	CXCL8, TNF	3576, 7124
BUTRIN	C0627897	0.00283852	n/a	2	0.0858858	5	CXCL8, TNF	3576, 7124
DIPHTHERIA TETANUS TOXOIDS	C0717715	0.00283852	n/a	2	0.0858858	5	LILRB1, HLA-C	10859, 3107
CSL 32	C3502702	0.00283852	n/a	2	0.0858858	5	CXCL8, TNF	3576, 7124
ISOBUTRIN	C0627895	0.00283852	n/a	2	0.0858858	5	CXCL8, TNF	3576, 7124
TRIFLUOPERAZINE HYDROCHLORIDE	C0304381	0.00283852	n/a	2	0.0858858	5	KLF6, P2RX7	1316, 5027
YAKUCHINONE A	C0078676	0.00283852	n/a	2	0.0858858	5	JUN, TNF	3725, 7124
ONOPORDUM EXTRACT	C3486813	0.00283852	n/a	2	0.0858858	5	PTGS1, CXCL8	5742, 3576
SODIUM ASCORBYL PHOSPHATE	C1814855	0.00283852	n/a	2	0.0858858	5	CXCL8, TNF	3576, 7124
VINYL ETHER	C0078264	0.00283852	n/a	2	0.0858858	5	EPX, TNF	8288, 7124
SALICIN EXTRACT	C0874039	0.00283852	n/a	2	0.0858858	5	ICAM1, TNF	3383, 7124
PLANTAGO LANCEOLATA LEAF EXTRACT	C3256432	0.00283852	n/a	2	0.0858858	5	SLAMF6, PTGS1	114836, 5742
AZADIRONE	C1453317	0.00283852	n/a	2	0.0858858	5	DDIT3, TNFRSF10B	1649, 8795
CEPHAMYCINS	C0007736	0.00283852	n/a	2	0.0858858	5	LYZ, RBFOX2	4069, 23543
OHIOENSIN F	C2353874	0.00283852	n/a	2	0.0858858	5	ICAM1, TNF	3383, 7124
PAPCX	C0043958	0.00283852	n/a	2	0.0858858	5	JUN, FOSL2	3725, 2355
PARTHENIUM HYSTEROPHORUS EXTRACT	C1956630	0.00283852	n/a	2	0.0858858	5	SLAMF6, TNF	114836, 7124
OLODATEROL	C2934193	0.00283852	n/a	2	0.0858858	5	ITGAM, CXCL8	3684, 3576
CT 1501R	C0243901	0.00283852	n/a	2	0.0858858	5	CXCL8, TNF	3576, 7124
F 4614	C0384949	0.00283852	n/a	2	0.0858858	5	ICAM1, TNF	3383, 7124
MABTHERA	C1314901	0.00283852	n/a	2	0.0858858	5	DDIT3, HLA-C	1649, 3107
HYPOTHIOCYANITE	C0122932	0.00283852	n/a	2	0.0858858	5	EPX, LYZ	8288, 4069
SDZ MRL 953	C0141826	0.00283852	n/a	2	0.0858858	5	CXCL8, TNF	3576, 7124
CP 195543	C0676002	0.00283852	n/a	2	0.0858858	5	ITGAM, CXCL8	3684, 3576
DIGITOXIGENIN	C0012257	0.00283852	n/a	2	0.0858858	5	ICAM1, TNF	3383, 7124
CDP 571	C0910864	0.00283852	n/a	2	0.0858858	5	ICAM1, TNF	3383, 7124
CDP870	C1172157	0.00283852	n/a	2	0.0858858	5	ICAM1, TNF	3383, 7124
MR 889	C0066861	0.00283852	n/a	2	0.0858858	5	ELANE, CTSG	1991, 1511
PF 04418948	C3490773	0.00283852	n/a	2	0.0858858	5	PTGER2, PTGER4	5732, 5734
BUDLEIN A	C1957519	0.00283852	n/a	2	0.0858858	5	CXCL8, TNF	3576, 7124
CI 949	C0055696	0.00283852	n/a	2	0.0858858	5	EPX, LYZ	8288, 4069
NAPROXEN N BUTYL NITRATE	C0673815	0.00283852	n/a	2	0.0858858	5	PTGS1, TNF	5742, 7124
SOLITHROMYCIN	C3655918	0.00283852	n/a	2	0.0858858	5	CXCL8, TNF	3576, 7124
PD 144795	C0381400	0.00420903	n/a	2	0.103063	6	ICAM1, TNF	3383, 7124
SALICORTIN	C0676660	0.00420903	n/a	2	0.103063	6	ICAM1, TNF	3383, 7124
3 DEOXYSAPPANCHALCONE	C2717294	0.00420903	n/a	2	0.103063	6	JUN, TNF	3725, 7124
RETINYL RETINOATE	C2354879	0.00420903	n/a	2	0.103063	6	JUN, CXCL8	3725, 3576
TYRPHOSTIN AG 126	C1435212	0.00420903	n/a	2	0.103063	6	ICAM1, TNF	3383, 7124
PIMARIC ACID	C0071065	0.00420903	n/a	2	0.103063	6	JUN, TNF	3725, 7124
OC000459	C3491265	0.00420903	n/a	2	0.103063	6	EPX, PTGS1	8288, 5742
ALLERGINA	C1172086	0.00420903	n/a	2	0.103063	6	CXCL8, TNF	3576, 7124
VTX 294	C3713619	0.00420903	n/a	2	0.103063	6	CD86, TNF	942, 7124
DIOSMECTITE	C0163748	0.00420903	n/a	2	0.103063	6	CXCL8, TNF	3576, 7124
AH 23848B	C0101892	0.00420903	n/a	2	0.103063	6	ICAM1, PTGER4	3383, 5734
PYRANOPROFEN	C0072652	0.00420903	n/a	2	0.103063	6	DDIT3, TNF	1649, 7124
CV 159	C0056620	0.00420903	n/a	2	0.103063	6	ICAM1, TNF	3383, 7124
ONO AP 324	C0764633	0.00420903	n/a	2	0.103063	6	ICAM1, PTGER4	3383, 5734
LEX 032	C0381874	0.00420903	n/a	2	0.103063	6	CTSG, PRTN3	1511, 5657
SEPTILIN	C0074359	0.00420903	n/a	2	0.103063	6	CXCL8, TNF	3576, 7124
TEA TREE OIL	C0216194	0.00420903	n/a	2	0.103063	6	CXCL8, TNF	3576, 7124
IMMTHER	C0281671	0.00420903	n/a	2	0.103063	6	CXCL8, TNF	3576, 7124
BRAIN NATRIURETIC PEPTIDE 45	C0107094	0.00420903	n/a	2	0.103063	6	FURIN, PCSK6	5045, 5046
CG100649	C4042958	0.00420903	n/a	2	0.103063	6	PTGS1, TNFRSF10B	5742, 8795
SC 58635	C0538926	0.00420903	n/a	2	0.103063	6	PTGS1, HGF	5742, 3082
ELLA	C2927379	0.00420903	n/a	2	0.103063	6	LGALS1, CXCL8	3956, 3576
CSY 0073	C3252427	0.00420903	n/a	2	0.103063	6	ITGAM, TNF	3684, 7124
BRL 50481	C1566895	0.00420903	n/a	2	0.103063	6	PDE7B, TNF	27115, 7124
T ACTIVIN	C0075727	0.00420903	n/a	2	0.103063	6	LYZ, CD38	4069, 952
NNKOAC	C0216823	0.00420903	n/a	2	0.103063	6	CXCL8, TNF	3576, 7124
PINE BARK EXTRACT	C0872909	0.00420903	n/a	2	0.103063	6	ICAM1, PTGS1	3383, 5742
HOCHU EKKI TO	C0911380	0.00420903	n/a	2	0.103063	6	ICAM1, BNIP3	3383, 664
2,3 DIHYDROXYBENZOIC ACID	C0046544	0.00420903	n/a	2	0.103063	6	ICAM1, TNF	3383, 7124
SC 10	C0173244	0.00420903	n/a	2	0.103063	6	CXCL10, ITGAX	3627, 3687
CI 959	C0055699	0.00420903	n/a	2	0.103063	6	EPX, LYZ	8288, 4069
7 OME APBT	C4077637	0.00582499	n/a	2	0.12024	7	JUN, TNF	3725, 7124
SB 656933	C3254571	0.00582499	n/a	2	0.12024	7	ITGAM, CXCL8	3684, 3576
GLUCOSAMINE	C0017718	0.00582499	n/a	2	0.12024	7	LGALS1, HPSE	3956, 10855
NOC 7	C0759114	0.00582499	n/a	2	0.12024	7	PTGS1, HGF	5742, 3082
CAELYX	C0701183	0.00582499	n/a	2	0.12024	7	ANPEP, TNF	290, 7124
ACTARIT	C0378042	0.00582499	n/a	2	0.12024	7	ICAM1, TNF	3383, 7124
XANTHOTOXOL	C0207281	0.00582499	n/a	2	0.12024	7	CXCL8, TNF	3576, 7124
ARACHIDONATE 12 LIPOXYGENASE INHIBITORS	C2936662	0.00582499	n/a	2	0.12024	7	JUN, ANXA1	3725, 301
INDOXAM	C0767967	0.00582499	n/a	2	0.12024	7	PTGS1, TNF	5742, 7124
LONOMYCIN	C0065176	0.00582499	n/a	2	0.12024	7	JUN, CD86	3725, 942
VETERINARY DRUGS	C0376438	0.00582499	n/a	2	0.12024	7	C5AR1, PTGS1	728, 5742
HUMIRA	C1171255	0.00582499	n/a	2	0.12024	7	CXCL8, TNF	3576, 7124
MGN1703	C2986392	0.00582499	n/a	2	0.12024	7	CXCL10, ICAM1	3627, 3383
HUMAN LEUKOCYTE ELASTASE INHIBITOR	C0379422	0.00582499	n/a	2	0.12024	7	ELANE, CTSG	1991, 1511
IRSOGLADINE MALEATE	C0091573	0.00582499	n/a	2	0.12024	7	JUN, CXCL8	3725, 3576
ECABET SODIUM	C0378416	0.00582499	n/a	2	0.12024	7	JUN, CXCL8	3725, 3576
CHLOROPROCAINE	C0055443	0.00582499	n/a	2	0.12024	7	ICAM1, TNF	3383, 7124
MDX H210 ANTIBODY	C0281736	0.00582499	n/a	2	0.12024	7	FCGR1A, CXCL8	2209, 3576
BROMIDE ION	C3848571	0.00582499	n/a	2	0.12024	7	EPX, LYZ	8288, 4069
BERBERRUBINE	C0760606	0.00582499	n/a	2	0.12024	7	CXCL8, TNF	3576, 7124
BEMIPARIN	C0916062	0.00582499	n/a	2	0.12024	7	EPX, TFPI	8288, 7035
CLADOSPORIUM HERBARUM EXTRACT	C1445427	0.00582499	n/a	2	0.12024	7	SLAMF6, CXCL8	114836, 3576
CNCM	C0633185	0.00582499	n/a	2	0.12024	7	CXCL8, TNF	3576, 7124
ANGIOGEN	C1172713	0.00582499	n/a	2	0.12024	7	TXNIP, HGF	10628, 3082
ARACHIDONATE 15 LIPOXYGENASE INHIBITORS	C2936663	0.00582499	n/a	2	0.12024	7	PTGS1, ANXA1	5742, 301
MUR NAC L ALA D ISOGLN	C0086659	0.00582499	n/a	2	0.12024	7	CXCL8, TNF	3576, 7124
CHLOROACETIC ACID	C0008225	0.00582499	n/a	2	0.12024	7	PXN, VCL	5829, 7414
DALFOPRISTIN / QUINUPRISTIN	C0526513	0.00582499	n/a	2	0.12024	7	ICAM1, TNF	3383, 7124
PROCYANIDIN B1	C0890082	0.00582499	n/a	2	0.12024	7	CXCL8, TNF	3576, 7124
HEXTEND	C1170317	0.00582499	n/a	2	0.12024	7	ITGAM, TNF	3684, 7124
ADENOSINE A3 RECEPTOR AGONIST CF102	C0289969	0.00582499	n/a	2	0.12024	7	CXCL8, TNF	3576, 7124
RU24858	C3852127	0.00768277	n/a	2	0.137417	8	JUN, CXCL8	3725, 3576
CEPROTIN	C1949898	0.00768277	n/a	2	0.137417	8	ICAM1, CXCL8	3383, 3576
DIPHENYLIODONIUM CHLORIDE	C0955122	0.00768277	n/a	2	0.137417	8	ITGAM, ICAM1	3684, 3383
BEPOTASTINE	C2698371	0.00768277	n/a	2	0.137417	8	CXCL10, ICAM1	3627, 3383
KELATORPHAN	C0064276	0.00768277	n/a	2	0.137417	8	ANPEP, LTA4H	290, 4048
ROMURTIDE	C0067246	0.00768277	n/a	2	0.137417	8	KITLG, TNF	4254, 7124
U 74389G	C0252126	0.00768277	n/a	2	0.137417	8	CXCL8, TNF	3576, 7124
DENBUFYLLINE	C0057384	0.00768277	n/a	2	0.137417	8	EPX, TNF	8288, 7124
CORN SILK PREPARATION	C0937769	0.00768277	n/a	2	0.137417	8	ICAM1, TNF	3383, 7124
6 CHLORO 2',3' DIDEOXYGUANOSINE	C0381855	0.00768277	n/a	2	0.137417	8	APOBEC3G, PTGS1	60489, 5742
2,2',4,6,6' PENTACHLOROBIPHENYL	C0962700	0.00768277	n/a	2	0.137417	8	ICAM1, CXCL8	3383, 3576
SALIX	C1815865	0.00768277	n/a	2	0.137417	8	CEBPA, ICAM1	1050, 3383
CALCOFLUOR WHITE	C0108160	0.00768277	n/a	2	0.137417	8	CD86, CXCL8	942, 3576
U 74389F	C0168928	0.00768277	n/a	2	0.137417	8	ANXA1, CXCL8	301, 3576
3,3',4',5 TETRACHLOROSALICYLANILIDE	C0046874	0.00768277	n/a	2	0.137417	8	ICAM1, CD86	3383, 942
PD IA	C0259505	0.00768277	n/a	2	0.137417	8	VIM, TNF	7431, 7124
GSK2656157	C4044483	0.00768277	n/a	2	0.137417	8	CEBPA, DDIT3	1050, 1649
PURINERGIC P2 RECEPTOR AGONISTS	C2936554	0.00768277	n/a	2	0.137417	8	CD244, P2RY2	51744, 5029
ENNIATIN B	C0116183	0.00768277	n/a	2	0.137417	8	CD86, CCR7	942, 1236
DESIRUDIN	C0378366	0.00768277	n/a	2	0.137417	8	TFPI, HVCN1	7035, 84329
JM 34	C0382648	0.00768277	n/a	2	0.137417	8	CD86, TNF	942, 7124
BXT 51072	C0757964	0.00768277	n/a	2	0.137417	8	ICAM1, TNF	3383, 7124
BAY 73 6691	C1674022	0.00768277	n/a	2	0.137417	8	ITGAM, CXCL8	3684, 3576
HUMULON	C0063031	0.00768277	n/a	2	0.137417	8	JUN, LYZ	3725, 4069
VERTICILLIN A	C0952065	0.00768277	n/a	2	0.137417	8	BNIP3, TNFRSF10B	664, 8795
CREBANINE	C0056473	0.00768277	n/a	2	0.137417	8	JUN, TNF	3725, 7124
NARASIN	C0068443	0.00768277	n/a	2	0.137417	8	DDIT3, TNFRSF10B	1649, 8795
SECURININE	C0074259	0.00768277	n/a	2	0.137417	8	ITGAM, CXCL8	3684, 3576
SIM 010603	C3490196	0.00768277	n/a	2	0.137417	8	RET, KITLG	5979, 4254
KJE	C0171293	0.00768277	n/a	2	0.137417	8	JUN, TNF	3725, 7124
DIFID	C3490744	0.00768277	n/a	2	0.137417	8	CCNA1, HES1	8900, 3280
XL184	C1710686	0.00768277	n/a	2	0.137417	8	RET, HGF	5979, 3082
CEVIMELINE	C0093437	0.00768277	n/a	2	0.137417	8	LYZ, ANPEP	4069, 290
MVA 85A	C2933874	0.00768277	n/a	2	0.137417	8	CD38, TNF	952, 7124
JTE 607	C1172246	0.00976658	n/a	2	0.154595	9	CXCL8, TNF	3576, 7124
PROXIGERMANIUM	C0081913	0.00976658	n/a	2	0.154595	9	ITGAM, TNF	3684, 7124
ENPROSTIL	C0085191	0.00976658	n/a	2	0.154595	9	CXCL8, PTGER2	3576, 5732
WOBE MUGOS E	C0935809	0.00976658	n/a	2	0.154595	9	ICAM1, ITGA5	3383, 3678
TRIAZOLODIAZEPINE	C0245118	0.00976658	n/a	2	0.154595	9	EPX, TNF	8288, 7124
TOCOPHEROL ACETATE	C0078373	0.00976658	n/a	2	0.154595	9	SLAMF6, LYZ	114836, 4069
POLYPHENON E	C0917976	0.00976658	n/a	2	0.154595	9	JUN, HGF	3725, 3082
PENTAMIDINE ISETHIONATE	C0030864	0.00976658	n/a	2	0.154595	9	LYZ, TNF	4069, 7124
FELINE INFECTIOUS PERITONITIS VIRUS VACCINE	C0310728	0.00976658	n/a	2	0.154595	9	ANPEP, TNF	290, 7124
ORAL POLIOVIRUS VACCINE	C0032375	0.00976658	n/a	2	0.154595	9	ITGAM, PVR	3684, 5817
BWA868C	C2350218	0.00976658	n/a	2	0.154595	9	ITGAM, PTGER4	3684, 5734
2 DEOXY 2,3 DEHYDRO N ACETYLNEURAMINIC ACID	C0046054	0.00976658	n/a	2	0.154595	9	LGALS1, HLA-C	3956, 3107
ACETOPYRROTHINE	C0050460	0.00976658	n/a	2	0.154595	9	PXN, VCL	5829, 7414
ELASTATINAL	C0059010	0.00976658	n/a	2	0.154595	9	ELANE, CTSG	1991, 1511
APRICOXIB	C1737955	0.00976658	n/a	2	0.154595	9	ZEB1, VIM	6935, 7431
MC1575	C3712842	0.00976658	n/a	2	0.154595	9	CXCL8, TNFRSF10B	3576, 8795
CAY 10441	C3179460	0.00976658	n/a	2	0.154595	9	PTGER4, HGF	5734, 3082
SOPHORIDINE	C0143094	0.00976658	n/a	2	0.154595	9	JUN, TNF	3725, 7124
ZOMETA	C0939788	0.00976658	n/a	2	0.154595	9	FCGR1A, CD86	2209, 942
ANASTELLIN	C0965520	0.00976658	n/a	2	0.154595	9	NRP1, ANTXR1	8829, 84168
OXIDIZED CELLULOSE	C0007649	0.00976658	n/a	2	0.154595	9	ICAM1, TNF	3383, 7124
PHLOXINE	C0250317	0.00976658	n/a	2	0.154595	9	LYZ, VIM	4069, 7431
ANTITHROMBIN III	C0003438	0.00976658	n/a	2	0.154595	9	TFPI, HGF	7035, 3082
ALLOFERON	C1721989	0.00976658	n/a	2	0.154595	9	JUN, CD244	3725, 51744
TUMOR VASCULATURE TARGETED TUMOR NECROSIS FACTOR ALPHA	C1143119	0.00976658	n/a	2	0.154595	9	ANPEP, TNF	290, 7124
ACANTHOIC ACID	C0390661	0.00976658	n/a	2	0.154595	9	CXCL8, TNF	3576, 7124

## Sheet: HL60 WT+2HG
Table S2 : List of Pharmacological Substances by cohort (related to Figure 1A)
Pharmacological Substances (Genomatix) enriched in HWT+2HG			ATRA-related Gene signature
			VD-related Gene Signature
Pharmacological substance	Pharmacological substance id	P-value	Adjusted p-value	# Genes (observed)	# Genes (expected)	# Genes (total)	List of observed genes	Gene ids
TRETINOIN	C0040845	1.18214e-11	n/a	32	8.2686	989	RXRA, CEBPA, GALM, NOG, ITGB7, GRN, THEMIS2, ITGAM, SLA, DHRS3, TNFAIP2, PLCB2, CD38, IRF1, NDRG1, NCF2, IER3, TLR3, ITGAX, DHRS9, CCNA1, ICAM1, TRIB1, PRAM1, CD300LB, SCPEP1, ITGA5, HIC1, IL6R, HOXA1, APBB1IP, FGR	6256, 1050, 130589, 9241, 3695, 2896, 9473, 3684, 6503, 9249, 7127, 5330, 952, 3659, 10397, 4688, 8870, 7098, 3687, 10170, 8900, 3383, 10221, 84106, 124599, 59342, 3678, 3090, 3570, 3198, 54518, 2268
RETINOIDS	C0035339	1.21452e-05	n/a	20	6.82222	816	RXRA, CEBPA, GALM, NOG, ITGB7, ITGAM, DHRS3, TNFAIP2, CD38, IRF1, NDRG1, IER3, TLR3, ITGAX, ICAM1, PRAM1, SCPEP1, HOXA1, APBB1IP, FGR	6256, 1050, 130589, 9241, 3695, 3684, 9249, 7127, 952, 3659, 10397, 8870, 7098, 3687, 3383, 84106, 59342, 3198, 54518, 2268
DEXAMETHASONE	C0011777	0.000135129	n/a	13	3.89602	466	RXRA, CEBPA, OSM, GRN, SLA, DDIT4, HGF, SELL, ICAM1, CCL20, ITGA5, MIR548D1, IL6R	6256, 1050, 5008, 2896, 6503, 54541, 3082, 6402, 3383, 6364, 3678, 693130, 3570
INTERFERON TYPE I	C0021743	4.39938e-05	n/a	11	2.52489	302	FAM46C, OSM, DDX60, ELF4, TYROBP, IRF1, TLR3, CD300A, OAS3, MOV10, CD300LB	54855, 5008, 55601, 2000, 7305, 3659, 7098, 11314, 4940, 4343, 124599
ENDOPEPTIDASES	C0030946	7.4157e-05	n/a	11	2.67538	320	ERAP2, GZMA, SPECC1, GRN, EDIL3, XK, CTSO, HGF, ITGA5, PRTN3, SERPINB8	64167, 3001, 92521, 2896, 10085, 7504, 1519, 3082, 3678, 5657, 5271
FUCOIDAN	C0060794	1.01968e-07	n/a	10	1.06179	127	GZMA, SELP, ITGAM, PSMB10, IRF1, CFP, HGF, SELL, ICAM1, ITGA5	3001, 6403, 3684, 5699, 3659, 5199, 3082, 6402, 3383, 3678
CYCLOHEXIMIDE	C0010572	0.00124296	n/a	10	3.16029	378	RXRA, CEBPA, GALM, SERPINB2, SERPINB1, IRF1, IER3, SAT1, TRIB1, KDM7A	6256, 1050, 130589, 5055, 1992, 3659, 8870, 6303, 10221, 80853
UROKINASE	C0042071	3.97383e-05	n/a	9	1.64703	197	OSM, SELP, SERPINB2, RAB31, SERPINB1, SERPINB10, HGF, F5, SERPINB8	5008, 6403, 5055, 11031, 1992, 5273, 3082, 2153, 5271
ASPIRIN	C0004057	9.33674e-05	n/a	9	1.83933	220	ACSL1, CCL2, ALOX5AP, SELP, ITGAM, SAT1, F5, ICAM1, PTGS1	2180, 6347, 241, 6403, 3684, 6303, 2153, 3383, 5742
RECOMBINANT MACROPHAGE COLONY STIMULATING FACTOR	C1524095	2.57755e-05	n/a	8	1.19556	143	CCL2, CEBPA, OSM, ITGAM, TYROBP, ITGAX, HGF, CCL20	6347, 1050, 5008, 3684, 7305, 3687, 3082, 6364
1,2 DIACYLGLYCEROL	C0043791	0.00234409	n/a	8	2.3326	279	ACSL1, SREBF1, PLCB2, CD53, PLEK, PRKCB, SPRY1, CD300LB	2180, 6720, 5330, 963, 5341, 5579, 10252, 124599
DIGLYCERIDES	C0012262	0.00244995	n/a	8	2.34932	281	ACSL1, SREBF1, PLCB2, CD53, PLEK, PRKCB, SPRY1, CD300LB	2180, 6720, 5330, 963, 5341, 5579, 10252, 124599
IONOMYCIN	C0022020	0.00330022	n/a	8	2.46637	295	ITGAM, SLA, PLEK, ITGAX, SELL, TRIB1, IL6R, FGR	3684, 6503, 5341, 3687, 6402, 10221, 3570, 2268
CILOSTAZOL	C0055729	2.7346e-05	n/a	7	0.87786	105	CCL2, SELP, ITGAM, SREBF1, NFE2, HGF, ICAM1	6347, 6403, 3684, 6720, 4778, 3082, 3383
SERINE PROTEINASE INHIBITORS	C0036733	0.000446482	n/a	7	1.37113	164	GPR132, GZMA, SERPINB2, SERPINB1, SERPINB10, HGF, PRTN3	29933, 3001, 5055, 1992, 5273, 3082, 5657
LINOLEIC ACID	C0023749	0.000480197	n/a	7	1.38785	166	GPR132, CCL2, ALOX5AP, ITGAM, SREBF1, ITGAX, PTGS1	29933, 6347, 241, 3684, 6720, 3687, 5742
CALCITRIOL	C0006674	0.000553722	n/a	7	1.4213	170	RXRA, GZMA, ITGAM, PLCB2, IER3, PRKCB, FGR	6256, 3001, 3684, 5330, 8870, 5579, 2268
INTERLEUKIN 12	C0123759	0.000573435	n/a	7	1.42966	171	CCL2, ITGAM, TYROBP, IRF1, TLR3, ITGAX, ICAM1	6347, 3684, 7305, 3659, 7098, 3687, 3383
SB 203580	C0297666	0.000802966	n/a	7	1.51326	181	CCL2, CEBPA, RCSD1, ITGAM, HGF, ICAM1, CD300LB	6347, 1050, 92241, 3684, 3082, 3383, 124599
ATORVASTATIN	C0286651	0.00216636	n/a	7	1.79752	215	CCL2, SREBF1, CD38, NCF2, CYBB, SELL, ICAM1	6347, 6720, 952, 4688, 1536, 6402, 3383
SERPINS	C0036764	0.00389987	n/a	7	1.99818	239	OSM, GZMA, SERPINB2, SERPINB1, SERPINB10, PRTN3, SERPINB8	5008, 3001, 5055, 1992, 5273, 5657, 5271
GANGLIOSIDES	C0017082	0.0056571	n/a	7	2.14031	256	GBP2, SIGLEC5, PLCB2, CD38, PSMB10, HGF, FLOT1	2634, 8778, 5330, 952, 5699, 3082, 10211
U 0126	C0755562	0.00693539	n/a	7	2.22391	266	CCL2, GBP2, OSM, IRF1, HGF, SPRY1, ITGA5	6347, 2634, 5008, 3659, 3082, 10252, 3678
BORTEZOMIB	C1176309	0.00707413	n/a	7	2.23227	267	FAM46C, ITGB7, DDIT4, C10orf54, EDIL3, CD38, DTX3L	54855, 3695, 54541, 64115, 10085, 952, 151636
GLUCANS	C0017696	8.13507e-05	n/a	6	0.719009	86	CCL2, GBP2, GRN, ITGAM, CFP, ICAM1	6347, 2634, 2896, 3684, 5199, 3383
WY 14,643	C0525129	0.000118481	n/a	6	0.769172	92	ACSL1, CCL2, RXRA, TNFAIP2, SREBF1, HGF	2180, 6347, 6256, 7127, 6720, 3082
PROLINEDITHIOCARBAMATE	C0084183	0.000118481	n/a	6	0.769172	92	CCL2, DDIT4, IRF1, HGF, ICAM1, ITGA5	6347, 54541, 3659, 3082, 3383, 3678
TELMISARTAN	C0248719	0.000149931	n/a	6	0.802615	96	ACSL1, CCL2, CEBPA, NCF2, HGF, ICAM1	2180, 6347, 1050, 4688, 3082, 3383
RECOMBINANT INTERFERON ALPHA INDUCIBLE PROTEIN 10	C1522712	0.000187654	n/a	6	0.836057	100	CCL2, GBP2, GRN, HGF, ICAM1, CCL20	6347, 2634, 2896, 3082, 3383, 6364
ARTESUNATE	C0052432	0.000187654	n/a	6	0.836057	100	CCL2, CEBPA, EDIL3, NCF2, CYBB, ICAM1	6347, 1050, 10085, 4688, 1536, 3383
VALSARTAN	C0216784	0.000232507	n/a	6	0.869499	104	CCL2, NOG, SELP, NCF2, CYBB, ICAM1	6347, 9241, 6403, 4688, 1536, 3383
PROTEASE INHIBITORS	C0033607	0.00024494	n/a	6	0.87786	105	CEBPA, GZMA, SERPINB1, CCR1, ITGA5, PRTN3	1050, 3001, 1992, 1230, 3678, 5657
FTY 720	C0388088	0.000830874	n/a	6	1.1036	132	CCL2, PRKCB, SELL, ICAM1, CCL20, ITGA5	6347, 5579, 6402, 3383, 6364, 3678
PLASMINOGEN ACTIVATOR	C0032144	0.0011705	n/a	6	1.17884	141	SELP, SERPINB2, SERPINB1, SERPINB10, F5, SERPINB8	6403, 5055, 1992, 5273, 2153, 5271
INDOMETHACIN	C0021246	0.00189893	n/a	6	1.29589	155	ALOX5AP, ITGAM, ITGAX, DHRS9, ICAM1, PTGS1	241, 3684, 3687, 10170, 3383, 5742
HEMIN	C0018988	0.002026	n/a	6	1.31261	157	CCL2, RXRA, CD38, NFE2, CYBB, ITGA5	6347, 6256, 952, 4778, 1536, 3678
CERULETIDE	C0006639	0.00252195	n/a	6	1.37113	164	CCL2, NOG, NCF2, HGF, SELL, ICAM1	6347, 9241, 4688, 3082, 6402, 3383
RECOMBINANT ALPHA CHEMOKINE	C1527035	0.00284353	n/a	6	1.40458	168	CCL2, OSM, NDRG1, ICAM1, CCR1, CCL20	6347, 5008, 10397, 3383, 1230, 6364
CARNITINE	C0007258	0.00319493	n/a	6	1.43802	172	ACSL1, RXRA, CEBPA, SREBF1, SLC16A9, SCUBE1	2180, 6256, 1050, 6720, 220963, 80274
VITAMIN D3	C3265062	0.00328763	n/a	6	1.44638	173	RXRA, OSM, THEMIS2, ITGAM, ITGAX, PRAM1	6256, 5008, 9473, 3684, 3687, 84106
MAGNESIUM CATION	C2346927	0.00338233	n/a	6	1.45474	174	ACSL1, ITGAM, EPX, PRG2, ICAM1, FGR	2180, 3684, 8288, 5553, 3383, 2268
DEXTRAN SULFATE SODIUM	C0079225	0.00421485	n/a	6	1.52162	182	ITGB7, GZMA, IRF1, IER3, TLR3, HGF	3695, 3001, 3659, 8870, 7098, 3082
CHOLECALCIFEROL	C0008318	0.00432868	n/a	6	1.52998	183	RXRA, OSM, THEMIS2, ITGAM, ITGAX, PRAM1	6256, 5008, 9473, 3684, 3687, 84106
PREDNISOLONE	C0032950	0.00587848	n/a	6	1.63031	195	CCL2, ITGAM, EPX, SELL, ICAM1, IL6R	6347, 3684, 8288, 6402, 3383, 3570
ALLERGEN	C3274161	0.00602376	n/a	6	1.63867	196	EPAS1, SPECC1, EPX, PRG2, ICAM1, CCL20	2034, 92521, 8288, 5553, 3383, 6364
DINOPROSTONE	C0012472	0.00930934	n/a	6	1.79752	215	OSM, GZMA, SUCNR1, HGF, PTGS1, CCL20	5008, 3001, 56670, 3082, 5742, 6364
PHOSPHATASE INHIBITOR	C0597217	0.00971898	n/a	6	1.81424	217	GPR132, SPECC1, CD53, PLEK, FGR, MIR181B1	29933, 92521, 963, 5341, 2268, 406955
AM 580	C0102885	3.14307e-06	n/a	5	0.234096	28	RXRA, GALM, DHRS3, IRF1, PRAM1	6256, 130589, 9249, 3659, 84106
WEB 2086	C0078460	3.77268e-06	n/a	5	0.242456	29	ALOX5AP, ITGAM, SELL, ICAM1, IL6R	241, 3684, 6402, 3383, 3570
CUPRAMMONIUM CELLULOSE	C0056591	2.78608e-05	n/a	5	0.359504	43	GZMA, ITGAM, ITGAX, SELL, ICAM1	3001, 3684, 3687, 6402, 3383
ELASTASE INHIBITOR	C0596481	3.88909e-05	n/a	5	0.384586	46	ITGAM, SERPINB1, ICAM1, PRTN3, SERPINB8	3684, 1992, 3383, 5657, 5271
RECOMBINANT GRANULOCYTE COLONY STIMULATING FACTOR	C0376562	5.85436e-05	n/a	5	0.418028	50	ITGAM, CD38, ITGAX, SELL, ICAM1	3684, 952, 3687, 6402, 3383
DIHYDROETHIDIUM	C0644810	5.85436e-05	n/a	5	0.418028	50	ITGAM, NCF2, CYBB, SELL, ICAM1	3684, 4688, 1536, 6402, 3383
EFAVIRENZ	C0674428	0.000110445	n/a	5	0.476552	57	CEBPA, ITGAM, SREBF1, CD38, ITGAX	1050, 3684, 6720, 952, 3687
4 BETA AMINOETHYLBENZOLSULFOFLUORIDE	C0047895	0.000141225	n/a	5	0.501634	60	SREBF1, NCF2, CYBB, CCR1, PRTN3	6720, 4688, 1536, 1230, 5657
CIGLITAZONE	C0055721	0.000192	n/a	5	0.535076	64	CCL2, RXRA, IRF1, CYBB, ICAM1	6347, 6256, 3659, 1536, 3383
RHEIN	C0073177	0.000206627	n/a	5	0.543437	65	CCL2, CD38, NCF2, CCR1, IL6R	6347, 952, 4688, 1230, 3570
ILOPROST	C0079594	0.000273792	n/a	5	0.576879	69	CCL2, SELP, CYBB, ICAM1, PTGS1	6347, 6403, 1536, 3383, 5742
CYSTEINYL LEUKOTRIENE	C0675175	0.000513919	n/a	5	0.660485	79	CCL2, ALOX5AP, EPX, ITGAX, PTGS1	6347, 241, 8288, 3687, 5742
ADALIMUMAB	C1122087	0.000758253	n/a	5	0.719009	86	GRN, EDIL3, ITGAX, CCL20, IL6R	2896, 10085, 3687, 6364, 3570
CYTOCHALASIN B	C0010737	0.00130492	n/a	5	0.810975	97	GZMA, ITGAM, EPX, PRG2, ICAM1	3001, 3684, 8288, 5553, 3383
TANSHINONE II A	C0897640	0.00142925	n/a	5	0.827696	99	CCL2, NOG, ITGAM, IRF1, ICAM1	6347, 9241, 3684, 3659, 3383
BUDESONIDE	C0054201	0.00201557	n/a	5	0.894581	107	CEBPA, ITGAM, EPX, ICAM1, CCL20	1050, 3684, 8288, 3383, 6364
MERBROMIN	C0025397	0.00209955	n/a	5	0.902941	108	SELP, CD38, ITGAX, SELL, CCR1	6403, 952, 3687, 6402, 1230
BETA GLUCANS	C1134651	0.00246123	n/a	5	0.936384	112	GZMA, ITGAM, TNFAIP2, CFP, CCL20	3001, 3684, 7127, 5199, 6364
PROTAMINES	C0033603	0.00436986	n/a	5	1.07015	128	SELP, ITGAM, HGF, LBR, F5	6403, 3684, 3082, 3930, 2153
CHENODEOXYCHOLIC ACID	C0008024	0.00451636	n/a	5	1.07851	129	RXRA, SREBF1, NFE2, DHRS9, PRG2	6256, 6720, 4778, 10170, 5553
BAFILOMYCIN A1	C0052919	0.00451636	n/a	5	1.07851	129	GRN, CD38, TLR3, CCNA1, FLOT1	2896, 952, 7098, 8900, 10211
TROGLITAZONE	C0245514	0.00581694	n/a	5	1.1454	137	CCL2, RXRA, CEBPA, SREBF1, ICAM1	6347, 6256, 1050, 6720, 3383
KAEMPFEROLS	C1257968	0.00715468	n/a	5	1.20392	144	CCL2, CEBPA, SREBF1, HGF, ICAM1	6347, 1050, 6720, 3082, 3383
SEVOFLURANE	C0074414	0.00715468	n/a	5	1.20392	144	EPAS1, CCL2, ITGAM, SELL, ICAM1	2034, 6347, 3684, 6402, 3383
MINOCYCLINE	C0026187	0.00715468	n/a	5	1.20392	144	CCL2, ITGAM, IRF1, OAS3, PRTN3	6347, 3684, 3659, 4940, 5657
RITUXIMAB	C0393022	0.00715468	n/a	5	1.20392	144	CD38, PRKCB, F5, IL6R, PRTN3	952, 5579, 2153, 3570, 5657
KETAMINE	C0022614	0.00800873	n/a	5	1.23736	148	ITGAM, TLR3, CYBB, SELL, MIR548D1	3684, 7098, 1536, 6402, 693130
CPG ODN	C0914671	0.0089313	n/a	5	1.27081	152	GPR132, CCL2, TLR3, ITGAX, CCR1	29933, 6347, 7098, 3687, 1230
PROTEIN KINASE INHIBITORS	C1449702	0.00966972	n/a	5	1.29589	155	OSM, SPECC1, HGF, ICAM1, IL6R	5008, 92521, 3082, 3383, 3570
TEPOXALIN	C0145162	5.88114e-06	n/a	4	0.125409	15	OSM, ITGAM, ICAM1, PTGS1	5008, 3684, 3383, 5742
NCX 4016	C0950966	8.1125e-05	n/a	4	0.234096	28	SELP, CYBB, ICAM1, PTGS1	6403, 1536, 3383, 5742
ABCIXIMAB	C0288672	0.000221679	n/a	4	0.30098	36	SELP, ITGAM, EDIL3, ICAM1	6403, 3684, 10085, 3383
ANTI INFLAMMATORY AGENTS	C0003209	0.000443998	n/a	4	0.359504	43	CCL2, DHRS9, ICAM1, PTGS1	6347, 10170, 3383, 5742
CETIRIZINE	C0055147	0.000529283	n/a	4	0.376226	45	CCL2, EPX, SELL, ICAM1	6347, 8288, 6402, 3383
RADIOIMMUNOCONJUGATES	C0243019	0.000678053	n/a	4	0.401307	48	IRF1, EPX, ICAM1, PRTN3	3659, 8288, 3383, 5657
PIROXICAM	C0031990	0.000988251	n/a	4	0.44311	53	ITGAM, ITGAX, CFP, PTGS1	3684, 3687, 5199, 5742
TRANS RESVERATROL	C1101322	0.0010605	n/a	4	0.451471	54	EPX, HGF, SELL, PTGS1	8288, 3082, 6402, 5742
OK 432	C0918027	0.00113638	n/a	4	0.459831	55	ITGAM, TLR3, ITGAX, ICAM1	3684, 7098, 3687, 3383
THERAPEUTIC CORYNEBACTERIUM PARVUM	C1522468	0.00129943	n/a	4	0.476552	57	CCL2, CCR1, CCL20, PRTN3	6347, 1230, 6364, 5657
TOFACITINIB	C2930696	0.00129943	n/a	4	0.476552	57	CCL2, NOG, OSM, ITGAM	6347, 9241, 5008, 3684
DIPHENYLENEIODIUM CHLORIDE	C0243281	0.00138679	n/a	4	0.484913	58	EPAS1, CCL2, CYBB, PRKCB	2034, 6347, 1536, 5579
7 AMINOACTINOMYCIN D	C0049832	0.00167337	n/a	4	0.509995	61	ITGAM, CD38, CD53, ITGA5	3684, 952, 963, 3678
AGLYCONE	C0304518	0.0018858	n/a	4	0.526716	63	TNFAIP2, C10orf54, DHRS9, ICAM1	7127, 64115, 10170, 3383
PYRROLIDINE DITHIOCARBAMATE	C0163305	0.002923	n/a	4	0.5936	71	CCL2, GRN, IRF1, ICAM1	6347, 2896, 3659, 3383
EPLERENONE	C0961485	0.00307527	n/a	4	0.601961	72	CCL2, EDIL3, NCF2, CYBB	6347, 10085, 4688, 1536
PROBUCOL	C0033215	0.0037386	n/a	4	0.635403	76	CCL2, CYBB, ICAM1, FGR	6347, 1536, 3383, 2268
OLIGOADENYLATE	C0133819	0.00429548	n/a	4	0.660485	79	SMOX, IRF1, OAS3, CCL20	54498, 3659, 4940, 6364
LOW MOLECULAR WEIGHT HEPARIN	C0019139	0.00429548	n/a	4	0.660485	79	SELP, EPX, HGF, F5	6403, 8288, 3082, 2153
DYNE VETERINARY DRUG	C0308914	0.00490585	n/a	4	0.685567	82	CCL2, PLEK, SELL, ICAM1	6347, 5341, 6402, 3383
GROWTH INHIBITORS	C0018282	0.00512157	n/a	4	0.693927	83	OSM, IRF1, SAT1, HGF	5008, 3659, 6303, 3082
AMLODIPINE	C0051696	0.00534358	n/a	4	0.702288	84	ACSL1, CCL2, EDIL3, CYBB	2180, 6347, 10085, 1536
SPIRONOLACTONE	C0037982	0.00580672	n/a	4	0.719009	86	CCL2, C10orf54, CYBB, SELL	6347, 64115, 1536, 6402
U 44619	C0917834	0.0062959	n/a	4	0.73573	88	SELP, PLEK, CYBB, PTGS1	6403, 5341, 1536, 5742
LUTEIN	C0043328	0.00681175	n/a	4	0.752451	90	CCL2, EPX, CYBB, ICAM1	6347, 8288, 1536, 3383
NITRITE ION	C3848529	0.00792683	n/a	4	0.785893	94	CCL2, EPX, CYBB, ICAM1	6347, 8288, 1536, 3383
DIPHENYLENEIODONIUM	C0058381	0.008223	n/a	4	0.794254	95	CCL2, NCF2, CYBB, ICAM1	6347, 4688, 1536, 3383
FT011	C3501043	5.61764e-06	n/a	3	0.0418028	5	CCL2, ICAM1, CCL20	6347, 3383, 6364
SALIX	C1815865	3.08853e-05	n/a	3	0.0668845	8	CEBPA, SREBF1, ICAM1	1050, 6720, 3383
Y 24180	C0149072	6.53745e-05	n/a	3	0.0836057	10	ITGAM, EPX, ICAM1	3684, 8288, 3383
MANOALIDE	C0065711	0.000118415	n/a	3	0.100327	12	CCL2, TLR3, SELL	6347, 7098, 6402
LY 255283	C0083286	0.000193548	n/a	3	0.117048	14	CCL2, ITGAM, ICAM1	6347, 3684, 3383
TRYPSIN	C0041236	0.000240464	n/a	3	0.125409	15	GZMA, NDRG1, PRTN3	3001, 10397, 5657
TRIFLUSAL	C0077126	0.000240464	n/a	3	0.125409	15	CCL2, ICAM1, PTGS1	6347, 3383, 5742
U 75302	C0077643	0.000294157	n/a	3	0.133769	16	CCL2, ITGAM, ICAM1	6347, 3684, 3383
LORNOXICAM	C0055477	0.000294157	n/a	3	0.133769	16	SELP, ICAM1, PTGS1	6403, 3383, 5742
13 HYDROXYOCTADECADIENOIC ACID	C0090346	0.000355021	n/a	3	0.14213	17	GPR132, ITGAM, PRKCB	29933, 3684, 5579
FILGRASTIM	C0210630	0.000423438	n/a	3	0.15049	18	ITGAM, CD300A, ICAM1	3684, 11314, 3383
OZAGREL	C0069392	0.000423438	n/a	3	0.15049	18	ALOX5AP, SELP, PTGS1	241, 6403, 5742
CINNAMATES	C0008801	0.000423438	n/a	3	0.15049	18	CEBPA, SREBF1, ICAM1	1050, 6720, 3383
CINNAMATE	C3496185	0.000423438	n/a	3	0.15049	18	CEBPA, SREBF1, ICAM1	1050, 6720, 3383
MENHADEN OIL	C0065939	0.00049978	n/a	3	0.158851	19	CEBPA, SREBF1, PTGS1	1050, 6720, 5742
TRIPAM CYS SER	C0091366	0.000677672	n/a	3	0.175572	21	ITGAM, TLR3, CCL20	3684, 7098, 6364
NEDOCROMIL SODIUM	C0886658	0.000779913	n/a	3	0.183933	22	EPX, SELL, ICAM1	8288, 6402, 3383
RO 31 8425	C0140783	0.000891461	n/a	3	0.192293	23	ITGAM, PRKCB, ICAM1	3684, 5579, 3383
R 59949	C0072922	0.00101264	n/a	3	0.200654	24	ITGAM, PRKCB, HGF	3684, 5579, 3082
RECOMBINANT GAMMA CHEMOKINE	C1527136	0.00114375	n/a	3	0.209014	25	CCL2, CCR1, CCL20	6347, 1230, 6364
ONO 1301	C0538030	0.00114375	n/a	3	0.209014	25	CCL2, HGF, ICAM1	6347, 3082, 3383
CHYMOPAPAIN	C0008736	0.00114375	n/a	3	0.209014	25	CD38, SELL, PRTN3	952, 6402, 5657
PYRROLIDINEDITHIOCARBAMATE	C1313719	0.0012851	n/a	3	0.217375	26	CCL2, OSM, ICAM1	6347, 5008, 3383
METALLOPORPHYRINS	C0025541	0.0012851	n/a	3	0.217375	26	NFE2, CYBB, PTGS1	4778, 1536, 5742
CORM 2	C1120350	0.00143698	n/a	3	0.225735	27	ITGAM, ICAM1, PTGS1	3684, 3383, 5742
ROFECOXIB	C0762662	0.00143698	n/a	3	0.225735	27	SELP, EDIL3, PTGS1	6403, 10085, 5742
COPPER SULFATE	C0056301	0.00159967	n/a	3	0.234096	28	CCL2, EPX, ICAM1	6347, 8288, 3383
EFLORNITHINE	C0002260	0.00159967	n/a	3	0.234096	28	SMOX, SAT1, HGF	54498, 6303, 3082
PROCATEROL	C0072032	0.00159967	n/a	3	0.234096	28	ITGAM, CD38, ICAM1	3684, 952, 3383
CHEMOKINE RECEPTOR ANTAGONIST	C1880030	0.00159967	n/a	3	0.234096	28	CCL2, PRKCB, CCR1	6347, 5579, 1230
IRON DEXTRAN COMPLEX	C0022092	0.00177344	n/a	3	0.242456	29	EPAS1, CCL2, CYBB	2034, 6347, 1536
TIROFIBAN	C0247025	0.00177344	n/a	3	0.242456	29	SELP, ITGAM, ICAM1	6403, 3684, 3383
EPICATECHIN 3 GALLATE	C0059422	0.00195857	n/a	3	0.250817	30	ITGAM, ICAM1, CCL20	3684, 3383, 6364
CILENGITIDE	C0971473	0.00195857	n/a	3	0.250817	30	CCL2, SELP, EDIL3	6347, 6403, 10085
BOLDINE	C0053908	0.00195857	n/a	3	0.250817	30	CEBPA, NOG, CYBB	1050, 9241, 1536
CC 4047	C1176324	0.00195857	n/a	3	0.250817	30	CEBPA, ITGAM, SELL	1050, 3684, 6402
SARPOGRELATE	C0286592	0.00215529	n/a	3	0.259178	31	CCL2, SELP, ICAM1	6347, 6403, 3383
CARBON BLACK	C0007010	0.00215529	n/a	3	0.259178	31	CCL2, SREBF1, ICAM1	6347, 6720, 3383
SERPIN SUPERFAMILY	C0036763	0.00236387	n/a	3	0.267538	32	SERPINB2, SERPINB1, PRTN3	5055, 1992, 5657
HUMAN THROMBIN	C2369149	0.00236387	n/a	3	0.267538	32	GZMA, F5, SERPINB8	3001, 2153, 5271
RECOMBINANT HUMAN THROMBOPOIETIN	C0392939	0.00236387	n/a	3	0.267538	32	SELP, DDIT4, NFE2	6403, 54541, 4778
IMPERATORIN	C0063435	0.00236387	n/a	3	0.267538	32	NOG, SREBF1, ICAM1	9241, 6720, 3383
RILPIVIRINE	C1566826	0.00236387	n/a	3	0.267538	32	CEBPA, SREBF1, SAT1	1050, 6720, 6303
INDO 1	C0063477	0.00236387	n/a	3	0.267538	32	ITGAM, EPX, ITGAX	3684, 8288, 3687
GLUCURONYL GLUCOSAMINE GLYCAN SULFATE	C0061450	0.00236387	n/a	3	0.267538	32	CCL2, PRKCB, HGF	6347, 5579, 3082
CICLESONIDE	C0907850	0.00258453	n/a	3	0.275899	33	CCL2, EDIL3, ICAM1	6347, 10085, 3383
CRANBERRY PREPARATION	C0453273	0.0028175	n/a	3	0.284259	34	CEBPA, SREBF1, ICAM1	1050, 6720, 3383
EPTIFIBATIDE	C0253563	0.0028175	n/a	3	0.284259	34	SELP, ITGAM, ICAM1	6403, 3684, 3383
CRANBERRY ALLERGENIC EXTRACT	C2740793	0.0028175	n/a	3	0.284259	34	CEBPA, SREBF1, ICAM1	1050, 6720, 3383
ZINC OXIDE	C0043491	0.00306302	n/a	3	0.29262	35	CEBPA, SREBF1, ICAM1	1050, 6720, 3383
TERFENADINE	C0085173	0.00306302	n/a	3	0.29262	35	PRG2, SELL, ICAM1	5553, 6402, 3383
LINAGLIPTIN	C2746078	0.00306302	n/a	3	0.29262	35	NCF2, CYBB, ICAM1	4688, 1536, 3383
MK 886	C0128640	0.00306302	n/a	3	0.29262	35	ALOX5AP, ITGAM, PTGS1	241, 3684, 5742
RECOMBINANT INTERLEUKIN 8	C1527432	0.00306302	n/a	3	0.29262	35	CCL2, ITGAM, ITGAX	6347, 3684, 3687
ONE ALPHA	C0591905	0.0038775	n/a	3	0.317702	38	CCL2, ITGAM, CCR1	6347, 3684, 1230
BENZYL ALCOHOL	C0005100	0.0038775	n/a	3	0.317702	38	ALOX5AP, SELP, EPX	241, 6403, 8288
SCOPARONE	C0074191	0.00417532	n/a	3	0.326062	39	CCL2, CEBPA, SREBF1	6347, 1050, 6720
KETOTIFEN	C0022642	0.00417532	n/a	3	0.326062	39	EPX, PRG2, ICAM1	8288, 5553, 3383
ECULIZUMAB	C1541483	0.00417532	n/a	3	0.326062	39	EDIL3, CFP, IL6R	10085, 5199, 3570
LOXORIBINE	C0209660	0.00448667	n/a	3	0.334423	40	IRF1, TLR3, CYBB	3659, 7098, 1536
RNA SYNTHESIS INHIBITORS	C0376567	0.00448667	n/a	3	0.334423	40	RXRA, CD38, PRTN3	6256, 952, 5657
STALLIMYCIN	C0244119	0.00448667	n/a	3	0.334423	40	IRF1, SAT1, CCR1	3659, 6303, 1230
MEASLES VACCINE	C0025010	0.00448667	n/a	3	0.334423	40	RXRA, TLR3, IL6R	6256, 7098, 3570
RIMONABANT	C1142933	0.0062524	n/a	3	0.376226	45	CCL2, SREBF1, EDIL3	6347, 6720, 10085
ALLERGENIC EXTRACT	C0440016	0.00705906	n/a	3	0.392947	47	EPX, ITGAX, PRG2	8288, 3687, 5553
EFALIZUMAB	C1174995	0.00705906	n/a	3	0.392947	47	ITGAM, ITGAX, ICAM1	3684, 3687, 3383
SAPORIN	C0244777	0.00792471	n/a	3	0.409668	49	NOG, ITGAM, CD38	9241, 3684, 952
COMPOUND 48 80	C0009574	0.00792471	n/a	3	0.409668	49	NDRG1, EPX, PRG2	10397, 8288, 5553
ARACHIDONATE 5 LIPOXYGENASE INHIBITORS	C1289971	0.00792471	n/a	3	0.409668	49	ALOX5AP, ICAM1, PTGS1	241, 3383, 5742
LATANOPROST	C0090306	0.00837996	n/a	3	0.418028	50	ACSL1, RXRA, EDIL3	2180, 6256, 10085
GLIOTOXIN	C0017641	0.00837996	n/a	3	0.418028	50	HGF, ICAM1, CCL20	3082, 3383, 6364
SODIUM SALICYLATE	C0037549	0.0088503	n/a	3	0.426389	51	CCL2, ICAM1, PTGS1	6347, 3383, 5742
NATALIZUMAB	C1172734	0.00933584	n/a	3	0.43475	52	EDIL3, SELL, ITGA5	10085, 6402, 3678
GAMMA TOCOPHEROL	C0017054	0.00983667	n/a	3	0.44311	53	PLEK, ICAM1, ITGA5	5341, 3383, 3678
CPENSPM	C0247670	0.000206101	n/a	2	0.0250817	3	SMOX, SAT1	54498, 6303
AM6 36	C3177627	0.000411073	n/a	2	0.0334423	4	RXRA, CD38	6256, 952
RS 504393	C3657798	0.000411073	n/a	2	0.0334423	4	CCL2, CCR1	6347, 1230
CHLORELLA 11 PEPTIDE	C2973755	0.000411073	n/a	2	0.0334423	4	CCL2, ICAM1	6347, 3383
LEUKADHERIN 1	C3851799	0.000681362	n/a	2	0.0418028	5	ITGAM, ICAM1	3684, 3383
BIGELOVIN	C0390315	0.000681362	n/a	2	0.0418028	5	RXRA, SREBF1	6256, 6720
KURARIDIN	C2974938	0.000681362	n/a	2	0.0418028	5	CCL2, PTGS1	6347, 5742
HYPERACUTE PANCREATIC CANCER VACCINE	C1831791	0.000681362	n/a	2	0.0418028	5	ERAP2, ALOX5AP	64167, 241
IDESCARPIN	C3713485	0.000681362	n/a	2	0.0418028	5	CEBPA, SREBF1	1050, 6720
CCR5 RECEPTOR ANTAGONISTS	C3850102	0.00101643	n/a	2	0.0501634	6	CCL2, CCR1	6347, 1230
SC 58635	C0538926	0.00101643	n/a	2	0.0501634	6	HGF, PTGS1	3082, 5742
OC000459	C3491265	0.00101643	n/a	2	0.0501634	6	EPX, PTGS1	8288, 5742
2 OXOTHIAZOLIDINE 4 CARBOXYLATE	C0124869	0.00101643	n/a	2	0.0501634	6	CCL2, HGF	6347, 3082
PINE BARK EXTRACT	C0872909	0.00101643	n/a	2	0.0501634	6	ICAM1, PTGS1	3383, 5742
ACETYLAMINOPHENYLARSINE OXIDE	C0642476	0.00101643	n/a	2	0.0501634	6	SMOX, SAT1	54498, 6303
WX UK1	C1453900	0.00101643	n/a	2	0.0501634	6	SERPINB2, HGF	5055, 3082
GR144053F	C1258963	0.00141516	n/a	2	0.058524	7	SELP, ITGAX	6403, 3687
NOC 7	C0759114	0.00141516	n/a	2	0.058524	7	HGF, PTGS1	3082, 5742
SKI 306X	C1137701	0.00141516	n/a	2	0.058524	7	OSM, PTGS1	5008, 5742
INDOXAM	C0767967	0.00141516	n/a	2	0.058524	7	CCL2, PTGS1	6347, 5742
EICOSAPENTAENOATE	C1370123	0.00141516	n/a	2	0.058524	7	ACSL1, SREBF1	2180, 6720
REOPRO	C0592046	0.00141516	n/a	2	0.058524	7	SELP, ITGAM	6403, 3684
PF 956980	C2975489	0.00141516	n/a	2	0.058524	7	CCL2, OSM	6347, 5008
SRPIN340	C3712368	0.00141516	n/a	2	0.058524	7	CCL2, ICAM1	6347, 3383
CEPROTIN	C1949898	0.00187648	n/a	2	0.0668845	8	CCL2, ICAM1	6347, 3383
DIPHENYLIODONIUM CHLORIDE	C0955122	0.00187648	n/a	2	0.0668845	8	ITGAM, ICAM1	3684, 3383
DENBUFYLLINE	C0057384	0.00187648	n/a	2	0.0668845	8	CCL2, EPX	6347, 8288
NITROASPIRIN	C0531264	0.00187648	n/a	2	0.0668845	8	CYBB, PTGS1	1536, 5742
2,2',4,6,6' PENTACHLOROBIPHENYL	C0962700	0.00187648	n/a	2	0.0668845	8	CCL2, ICAM1	6347, 3383
GSK2606414	C3500976	0.00187648	n/a	2	0.0668845	8	CCL2, CCL20	6347, 6364
DIMEMORFAN	C0058193	0.00187648	n/a	2	0.0668845	8	CCL2, ITGAM	6347, 3684
PROXIGERMANIUM	C0081913	0.00239931	n/a	2	0.0752451	9	CCL2, ITGAM	6347, 3684
WOBE MUGOS E	C0935809	0.00239931	n/a	2	0.0752451	9	ICAM1, ITGA5	3383, 3678
LYSO 7	C3714050	0.00239931	n/a	2	0.0752451	9	CCL2, PTGS1	6347, 5742
NSC 651016	C0676196	0.00239931	n/a	2	0.0752451	9	CCL2, CCR1	6347, 1230
N ACETYLCYSTEINAMIDE	C1452654	0.00239931	n/a	2	0.0752451	9	CCL2, ITGAM	6347, 3684
RAMATROBAN	C0753318	0.00298349	n/a	2	0.0836057	10	CCL2, ITGAM	6347, 3684
WOBENZYM	C0078510	0.00298349	n/a	2	0.0836057	10	ICAM1, ITGA5	3383, 3678
ONO 5046	C0133951	0.00298349	n/a	2	0.0836057	10	ICAM1, PRTN3	3383, 5657
ANTISTASIN	C0052098	0.00362662	n/a	2	0.0919663	11	CFP, F5	5199, 2153
ABIETIC ACID	C0050365	0.00362662	n/a	2	0.0919663	11	CEBPA, SREBF1	1050, 6720
GAMBOGE	C0301271	0.00362662	n/a	2	0.0919663	11	CEBPA, SREBF1	1050, 6720
YCG 063	C2974353	0.00362662	n/a	2	0.0919663	11	CCL2, ICAM1	6347, 3383
PYRILAMINE MALEATE	C0282330	0.00362662	n/a	2	0.0919663	11	EPX, PRG2	8288, 5553
BAY X 1005	C0656891	0.00362662	n/a	2	0.0919663	11	ALOX5AP, ITGAM	241, 3684
VIOXX	C0876768	0.00362662	n/a	2	0.0919663	11	HGF, PTGS1	3082, 5742
PCB 104	C1453501	0.00362662	n/a	2	0.0919663	11	CCL2, ICAM1	6347, 3383
PHENYLAMIL	C0070664	0.00432825	n/a	2	0.100327	12	NOG, ITGA5	9241, 3678
PHENYL BUTYRATE	C3848590	0.00432825	n/a	2	0.100327	12	CEBPA, ITGAM	1050, 3684
CATUMAXOMAB	C1831854	0.00432825	n/a	2	0.100327	12	GPR132, CD38	29933, 952
ETHYL PROTOCATECHUATE	C0059781	0.00432825	n/a	2	0.100327	12	CCL2, NDRG1	6347, 10397
3 MORPHOLINO SYDNONIMINE MONOHYDROCHLORIDE	C0951117	0.00432825	n/a	2	0.100327	12	CYBB, PTGS1	1536, 5742
ISIS 2302	C3495448	0.00508738	n/a	2	0.108687	13	ITGAX, ICAM1	3687, 3383
EOSINOPHIL DERIVED NEUROTOXIN	C0059409	0.00508738	n/a	2	0.108687	13	EPX, PRG2	8288, 5553
PHOSPHORUS 32	C0851287	0.00508738	n/a	2	0.108687	13	CCL2, ICAM1	6347, 3383
2,5 DI TERT BUTYLHYDROQUINONE	C0045546	0.00508738	n/a	2	0.108687	13	CCL2, PLEK	6347, 5341
POLY L LACTIC ACID	C0525166	0.00508738	n/a	2	0.108687	13	OSM, HGF	5008, 3082
CYL 26Z	C1613957	0.00508738	n/a	2	0.108687	13	ITGAM, ICAM1	3684, 3383
CP 105696	C0289246	0.00508738	n/a	2	0.108687	13	ITGAM, EPX	3684, 8288
HEME ARGINATE	C0062212	0.005903	n/a	2	0.117048	14	CCL2, ICAM1	6347, 3383
TAMIBAROTENE	C1567753	0.005903	n/a	2	0.117048	14	RXRA, CD38	6256, 952
PICLAMILAST	C0295451	0.005903	n/a	2	0.117048	14	CEBPA, TLR3	1050, 7098
RWJ 67657	C0910100	0.005903	n/a	2	0.117048	14	ITGAM, ICAM1	3684, 3383
CV 3988	C0056625	0.005903	n/a	2	0.117048	14	CCL2, ICAM1	6347, 3383
RP 73401	C0295452	0.00677413	n/a	2	0.125409	15	EPX, PRG2	8288, 5553
SMALLPOX VACCINE	C0037355	0.00677413	n/a	2	0.125409	15	RXRA, TLR3	6256, 7098
APO 866	C1879518	0.00677413	n/a	2	0.125409	15	CCL2, CD38	6347, 952
LOVAZA	C0912903	0.00677413	n/a	2	0.125409	15	SREBF1, PRKCB	6720, 5579
LG 268	C0965513	0.00677413	n/a	2	0.125409	15	RXRA, NDRG1	6256, 10397
RO 41 5253	C0250032	0.00677413	n/a	2	0.125409	15	RXRA, CD38	6256, 952
COD LIVER OIL	C0009213	0.00769981	n/a	2	0.133769	16	CCL2, SERPINB2	6347, 5055
RECOMBINANT GRANULOCYTE MACROPHAGE COLONY STIMULATING FACTORS	C0376563	0.00769981	n/a	2	0.133769	16	ITGAM, ICAM1	3684, 3383
FRUCTOOLIGOSACCHARIDE	C0873033	0.00769981	n/a	2	0.133769	16	TNFAIP2, SELL	7127, 6402
WEB 2170	C0085001	0.00769981	n/a	2	0.133769	16	CCL2, HGF	6347, 3082
ADENOSINE DIPHOSPHATE RECEPTOR ANTAGONISTS	C2936586	0.00769981	n/a	2	0.133769	16	SUCNR1, PTGS1	56670, 5742
ISOANGUSTONE A	C2936061	0.00769981	n/a	2	0.133769	16	CCL2, ICAM1	6347, 3383
JTE 522	C0670957	0.00769981	n/a	2	0.133769	16	HGF, PTGS1	3082, 5742
POLYAMINE ANALOGUE	C1709590	0.00867907	n/a	2	0.14213	17	SMOX, SAT1	54498, 6303
INT 747	C2830015	0.00867907	n/a	2	0.14213	17	CEBPA, ITGAM	1050, 3684
SPIRAMYCIN	C0037962	0.00867907	n/a	2	0.14213	17	CEBPA, SREBF1	1050, 6720
MAPRACORAT	C3252363	0.00867907	n/a	2	0.14213	17	EPX, ICAM1	8288, 3383
4 BROMOPHENACYL BROMIDE	C0048134	0.00971097	n/a	2	0.15049	18	ALOX5AP, EPX	241, 8288
POLY ICLC	C0071359	0.00971097	n/a	2	0.15049	18	TLR3, PRG2	7098, 5553
DIRECT THROMBIN INHIBITORS	C3541936	0.00971097	n/a	2	0.15049	18	SELP, F5	6403, 2153
CB 3717	C0054911	0.00971097	n/a	2	0.15049	18	SAT1, HGF	6303, 3082
BACTENECIN	C0052891	0.00971097	n/a	2	0.15049	18	CYBB, SELL	1536, 6402
CORN TRYPSIN INHIBITOR	C0077421	0.00971097	n/a	2	0.15049	18	SELP, F5	6403, 2153
GAMMA THROMBIN	C0017052	0.00971097	n/a	2	0.15049	18	SELP, F5	6403, 2153

## Sheet: IDH1 MUT Verhaak
Table S2 : List of Pharmacological Substances by cohort (related to Figure 1A)
Pharmacological Substances (Genomatix) enriched in IDH1MUT patient (Verhaak)				ATRA-related Gene signature
				VD-related Gene Signature
Pharmacological substance	Pharmacological substance id	P-value	Adjusted p-value	# Genes (observed)	# Genes (expected)	# Genes (total)	List of observed genes	Gene ids
TRETINOIN	C0040845	0.00158009	n/a	94	69.7569	989	ZSCAN4, HNF1B, MGAT5, ZBTB16, CCDC26, TGFBI, TLR3, THBD, CSF3, SOX14, PTGDS, GALM, KRT80, POU4F1, HOXA9, HOXB1, MYCN, ZRSR1, HOXD8, NCF2, IER3, SERPINF1, OTUD7B, KLF4, CYP2C18, SPZ1, PALD1, CCRL2, GPRC5A, IL5RA, HSD17B6, ZSCAN10, FIGF, IRF8, DUOX2, TAGLN, NEDD9, SOX3, CBX2, HBZ, FGF8, IL23R, PRAME, ENO2, RBP7, MYCL, BCL2A1, CD33, COL8A2, RBP4, RBP1, ITGAM, CCND1, BST1, DHRS9, CXCL16, CCL24, S100A…	201516, 6928, 4249, 7704, 137196, 7045, 7098, 7056, 1440, 8403, 5730, 130589, 144501, 5457, 3205, 3211, 4613, 7310, 3234, 4688, 8870, 5176, 56957, 9314, 1562, 84654, 27143, 9034, 9052, 3568, 8630, 84891, 2277, 3394, 50506, 6876, 4739, 6658, 84733, 3050, 2253, 149233, 23532, 2026, 116362, 4610, 597, 945, 1296, 5950, 5947, 3684, 595, 683, 10170, 58191, 6369, 6280, 124599, 149685, 1811, 81029, 3250,…
HEPARIN	C0019134	0.000237743	n/a	50	29.9764	425	SMAD1, CAPN3, ROBO1, PRG2, THBD, PLG, AZU1, SERPINF1, FGFRL1, LDLR, HYLS1, GPRC5A, NRP1, CPA3, VLDLR, NCAN, THBS4, ST14, RNASE2, F3, TFPI2, TFPI, ARTN, FGF8, KIR2DL4, STAB2, LRP1, ITGAM, FCGR2A, RNASE3, GP1BA, BST1, F5, NCR1, TNFAIP6, RNH1, B3GAT1, XYLT1, F8, LIPC, SERPINA1, SERPINE1, ANXA2, SEPP1, SGSH, CECR1, SERPIND1, CFHR4, CFP, CD1A	4086, 825, 6091, 5553, 7056, 5340, 566, 5176, 53834, 3949, 219844, 9052, 8829, 1359, 7436, 1463, 7060, 6768, 6036, 2152, 7980, 7035, 9048, 2253, 3805, 55576, 4035, 3684, 2212, 6037, 2811, 683, 2153, 9437, 7130, 6050, 27087, 64131, 2157, 3990, 5265, 5054, 302, 6414, 6448, 51816, 3053, 10877, 5199, 909
PORCINE HEPARIN	C0770546	0.00026604	n/a	50	30.1175	427	SMAD1, CAPN3, ROBO1, PRG2, THBD, PLG, AZU1, SERPINF1, FGFRL1, LDLR, HYLS1, GPRC5A, NRP1, CPA3, VLDLR, NCAN, THBS4, ST14, RNASE2, F3, TFPI2, TFPI, ARTN, FGF8, KIR2DL4, STAB2, LRP1, ITGAM, FCGR2A, RNASE3, GP1BA, BST1, F5, NCR1, TNFAIP6, RNH1, B3GAT1, XYLT1, F8, LIPC, SERPINA1, SERPINE1, ANXA2, SEPP1, SGSH, CECR1, SERPIND1, CFHR4, CFP, CD1A	4086, 825, 6091, 5553, 7056, 5340, 566, 5176, 53834, 3949, 219844, 9052, 8829, 1359, 7436, 1463, 7060, 6768, 6036, 2152, 7980, 7035, 9048, 2253, 3805, 55576, 4035, 3684, 2212, 6037, 2811, 683, 2153, 9437, 7130, 6050, 27087, 64131, 2157, 3990, 5265, 5054, 302, 6414, 6448, 51816, 3053, 10877, 5199, 909
POLYSACCHARIDES	C0032594	0.000165097	n/a	44	24.9686	354	MGAT5, CD59, CDH2, MAG, CASQ1, LGALS3, SIGLEC5, UPK3A, CDH5, RNASE1, KL, FBXO6, SLC37A2, EPYC, CXXC5, CLEC4F, FCN3, SIGLEC15, CD93, CLEC1B, PDPN, GP1BA, CYBB, CLEC4D, S100A9, NCR1, GCNT2, CLEC10A, SLC34A1, B3GAT1, CD4, F8, S100A8, CHST2, UMOD, SIGLEC7, LGALS3BP, CD1D, TYROBP, RBP3, SMO, CFP, CLGN, SIGLEC9	4249, 966, 1000, 4099, 844, 3958, 8778, 7380, 1003, 6035, 9365, 26270, 219855, 1833, 51523, 165530, 8547, 284266, 22918, 51266, 10630, 2811, 1536, 338339, 6280, 9437, 2651, 10462, 6569, 27087, 920, 2157, 6279, 9435, 7369, 27036, 3959, 912, 7305, 5949, 6608, 5199, 1047, 27180
BROMODEOXYURIDINE	C0006233	0.00542566	n/a	40	26.3793	374	CPE, ZBTB16, CDH2, CDKN1A, CUX2, MYCN, TACC2, ESPN, SERPINF1, KRT12, CD19, CD1E, KIT, PAX7, DNTT, DST, TAGLN, BAIAP2L1, CBX2, FGF8, ENO2, CCND1, GALC, NEFM, S100B, CD4, SCGB1A1, SEMA3C, HOXC6, EPHB3, DCBLD2, ERCC2, AGTRAP, RBP3, SP8, SEMA4C, PECAM1, KIAA0319, HAVCR1, TEAD1	1363, 7704, 1000, 1026, 23316, 4613, 10579, 83715, 5176, 3859, 930, 913, 3815, 5081, 1791, 667, 6876, 55971, 84733, 2253, 2026, 595, 2581, 4741, 6285, 920, 7356, 10512, 3223, 2049, 131566, 2068, 57085, 5949, 221833, 54910, 5175, 9856, 26762, 7003
INTERFERON TYPE I	C0021743	0.000173073	n/a	39	21.3009	302	NOD2, LY96, TLR3, MX1, TLR8, NLRC5, CD80, CD200R1, TRIM29, MX2, IRF8, OSM, USP18, TLR7, APOF, TNFSF13B, HDAC9, CXCL9, GPR183, IFNK, ZKSCAN7, CD300LB, UNC93B1, IFI44, LILRB1, NT5E, BLNK, CD4, BANK1, MCOLN2, IFIT1, NLRC4, OASL, CD86, ISG15, TYROBP, CD14, OAS2, SAMHD1	64127, 23643, 7098, 4599, 51311, 84166, 941, 131450, 23650, 4600, 3394, 5008, 11274, 51284, 319, 10673, 9734, 4283, 1880, 56832, 55888, 124599, 81622, 10561, 10859, 4907, 29760, 920, 55024, 255231, 3434, 58484, 8638, 942, 9636, 7305, 929, 4939, 25939
IONOMYCIN	C0022020	0.000219753	n/a	38	20.8072	295	HMBOX1, C5AR1, CAPN3, TBX15, ITGAL, ANO1, STXBP2, CD80, CD200R1, KNG1, CD19, IL5RA, CR1, ALOX5, BEX3, RNASE2, IL23R, SH2D1A, ITGAM, ANXA6, S100A9, PTPRK, BLNK, B3GAT1, CD4, TNF, SERPINA1, GPR65, MCOLN1, FGR, HAVCR2, STX11, TREM2, CD86, CD1D, CD300LF, CD14, FCGR3B	79618, 728, 825, 6913, 3683, 55107, 6813, 941, 131450, 3827, 930, 3568, 1378, 240, 27018, 6036, 149233, 4068, 3684, 309, 6280, 5796, 29760, 27087, 920, 7124, 5265, 8477, 57192, 2268, 84868, 8676, 54209, 942, 912, 146722, 929, 2215
GLYCOSAMINOGLYCANS	C0017973	0.00251402	n/a	35	21.3009	302	HIVEP3, TGFBI, PRG2, THBD, TIMP1, SERPINF1, DSC2, NRP1, NCAN, CCR2, RNASE2, EPYC, MMP13, OSM, TFPI, STAB2, ACOD1, LRP1, LACRT, ARSG, XCR1, TNFAIP6, SLC34A1, B3GAT1, XYLT1, CHST2, MCOLN1, TNMD, LGALS3BP, SGSH, SERPIND1, CFP, PECAM1, CCR1, NGB	59269, 7045, 5553, 7056, 7076, 5176, 1824, 8829, 1463, 729230, 6036, 1833, 4322, 5008, 7035, 55576, 730249, 4035, 90070, 22901, 2829, 7130, 6569, 27087, 64131, 9435, 57192, 64102, 3959, 6448, 3053, 5199, 5175, 1230, 58157
ATORVASTATIN	C0286651	7.12129e-06	n/a	34	15.1646	215	CD59, CD96, CLCN1, CST3, ACE2, TIMP1, NCF2, CTSS, DDAH1, LDLR, CCRL2, MMP2, CDH5, RETN, CYBA, NPC1L1, APOC2, PON2, CX3CR1, MNDA, LRP1, CD36, CD68, CYBB, LIPC, PPARD, ABCC6, PLTP, SERPINE1, CYP2C8, SERPINH1, NR1I2, CETP, CD14	966, 10225, 1180, 1471, 59272, 7076, 4688, 1520, 23576, 3949, 9034, 4313, 1003, 56729, 1535, 29881, 344, 5445, 1524, 4332, 4035, 948, 968, 1536, 3990, 5467, 368, 5360, 5054, 1558, 871, 8856, 1071, 929
INTERLEUKIN 12	C0123759	3.07726e-07	n/a	32	12.0611	171	CCL17, TLR3, MPEG1, CSF3, IL12RB1, TLR8, CD80, IL1RL2, CCR2, IRF8, TLR7, IL23R, TNFSF13B, CXCL9, CLEC7A, TLR5, ITGAM, LILRB1, CD1C, IL36B, CD4, TNF, CD1B, TREM2, CD86, SLAMF7, CD1D, TYROBP, IL1RN, CD14, CD1A, HRH1	6361, 7098, 219972, 1440, 3594, 51311, 941, 8808, 729230, 3394, 51284, 149233, 10673, 4283, 64581, 7100, 3684, 10859, 911, 27177, 920, 7124, 910, 54209, 942, 57823, 912, 7305, 3557, 929, 909, 3269
CYTOCHALASINS	C0010739	0.000423154	n/a	32	17.0689	242	HNF1B, CDA, KCNA5, HSPB1, CDH2, ITGAL, ASGR1, DDO, MMP2, CDH5, CR1, EPX, RNASE1, CXCR2, NEDD9, TLX2, GPHN, CD36, EPHX1, GP1BA, BASP1, CDH13, CALD1, MYBPH, SLC6A12, CD4, AKAP5, ENC1, PAX4, VNN2, FCGR3B, PECAM1	6928, 978, 3741, 3315, 1000, 3683, 432, 8528, 4313, 1003, 1378, 8288, 6035, 3579, 4739, 3196, 10243, 948, 2052, 2811, 10409, 1012, 800, 4608, 6539, 920, 9495, 8507, 5078, 8875, 2215, 5175
OLEIC ACID	C0028928	0.00353311	n/a	32	19.3965	275	DGAT2, ENTPD1, FABP1, PLG, AQP9, ADH6, LDLR, PLA2G10, FAAH, PLIN4, RETN, LIPA, ANGPT1, APOF, NPC1L1, ACAT1, CD36, PAH, WFDC1, ALB, UCP2, C1orf116, LIPC, PPARD, S100A8, PLTP, LPCAT1, STEAP4, CES1, CETP, IL1RN, B3GALT4	84649, 953, 2168, 5340, 366, 130, 3949, 8399, 2166, 729359, 56729, 3988, 284, 319, 29881, 38, 948, 5053, 58189, 213, 7351, 79098, 3990, 5467, 6279, 5360, 79888, 79689, 1066, 1071, 3557, 8705
RECOMBINANT INTERFERON	C1522537	7.61239e-05	n/a	31	14.8824	211	TLR3, MX1, PYHIN1, MPEG1, NLRC5, C2, CD80, IL10RA, CD200R1, CD19, IRF8, USP18, TLR7, TNFSF13B, CXCL9, MNDA, UNC93B1, IFI44, BLNK, TNF, CEACAM6, RTP4, IFIT1, OASL, NLRP2, ISG15, TLR10, IL1F10, OAS2, SAMHD1, CD74	7098, 4599, 149628, 219972, 84166, 717, 941, 3587, 131450, 930, 3394, 11274, 51284, 10673, 4283, 4332, 81622, 10561, 29760, 7124, 4680, 64108, 3434, 8638, 55655, 9636, 81793, 84639, 4939, 25939, 972
DITHIOTHREITOL	C0012789	0.00171696	n/a	31	17.7743	252	CLC, HSPB1, GLRX, ITGAL, SLC38A4, AGR2, HSD17B6, EPX, ALOX5, RNASE1, CA3, ALDH2, NPC1L1, GHRHR, PON2, ASPA, RBP4, PNP, NAAA, PAH, RNASE3, GP1BA, RNH1, SERPINA1, UMOD, TEKT3, DIO3, AKR1B1, GRN, CES1, ADPRH	1178, 3315, 2745, 3683, 55089, 10551, 8630, 8288, 240, 6035, 761, 217, 29881, 2692, 5445, 443, 5950, 4860, 27163, 5053, 6037, 2811, 6050, 5265, 7369, 64518, 1735, 231, 2896, 1066, 141
VITAMIN A	C0042839	0.00220214	n/a	31	18.0564	256	CST3, PTGDS, SERPINF1, PDZD3, HSD17B6, EYA2, RETN, HLA-DQB1, APOC2, LST1, RBP4, RBP1, EFHD1, PDC, DHRS9, ANXA6, CD300LB, ALB, HPR, RXRA, CRB1, DHRS3, SERPINA1, SCGB1A1, UMOD, MAK, NTM, CKM, CES1, RBP3, HAVCR1	1471, 5730, 5176, 79849, 8630, 2139, 56729, 3119, 344, 7940, 5950, 5947, 80303, 5132, 10170, 309, 124599, 213, 3250, 6256, 23418, 9249, 5265, 7356, 7369, 4117, 50863, 1158, 1066, 5949, 26762
ALLERGEN	C3274161	4.5733e-05	n/a	30	13.8244	196	CCL17, SLAMF6, LY96, CSN1S1, AGXT, PRG2, EPAS1, LGALS3, CD80, EPX, DCANP1, FCER1G, TNFSF13B, ASPA, TLR5, RNASE3, HLA-DPB1, CLEC4D, SLC26A3, ALB, CD1C, BLNK, CD4, LRG1, CD86, AKR1B1, HLA-DRA, TLR10, CSTA, CD14	6361, 114836, 23643, 1446, 189, 5553, 2034, 3958, 941, 8288, 140947, 2207, 10673, 443, 7100, 6037, 3115, 338339, 1811, 213, 911, 29760, 920, 116844, 942, 231, 3122, 81793, 1475, 929
INTERFERONS	C0021747	0.000179577	n/a	30	14.8824	211	TLR3, MX1, PYHIN1, MPEG1, NLRC5, C2, CD80, IL10RA, CD200R1, CD19, IRF8, USP18, TLR7, TNFSF13B, CXCL9, MNDA, UNC93B1, IFI44, TNF, CEACAM6, RTP4, IFIT1, OASL, NLRP2, ISG15, TLR10, IL1F10, OAS2, SAMHD1, CD74	7098, 4599, 149628, 219972, 84166, 717, 941, 3587, 131450, 930, 3394, 11274, 51284, 10673, 4283, 4332, 81622, 10561, 7124, 4680, 64108, 3434, 8638, 55655, 9636, 81793, 84639, 4939, 25939, 972
INTERFERON	C3652465	0.000179577	n/a	30	14.8824	211	TLR3, MX1, PYHIN1, MPEG1, NLRC5, C2, CD80, IL10RA, CD200R1, CD19, IRF8, USP18, TLR7, TNFSF13B, CXCL9, MNDA, UNC93B1, IFI44, TNF, CEACAM6, RTP4, IFIT1, OASL, NLRP2, ISG15, TLR10, IL1F10, OAS2, SAMHD1, CD74	7098, 4599, 149628, 219972, 84166, 717, 941, 3587, 131450, 930, 3394, 11274, 51284, 10673, 4283, 4332, 81622, 10561, 7124, 4680, 64108, 3434, 8638, 55655, 9636, 81793, 84639, 4939, 25939, 972
HUMAN LEUKOCYTE INTERFERON	C0733470	0.000195443	n/a	30	14.953	212	TLR3, MX1, PYHIN1, MPEG1, NLRC5, C2, CD80, IL10RA, CD200R1, CD19, IRF8, USP18, TLR7, TNFSF13B, CXCL9, MNDA, UNC93B1, IFI44, TNF, CEACAM6, RTP4, IFIT1, OASL, NLRP2, ISG15, TLR10, IL1F10, OAS2, SAMHD1, CD74	7098, 4599, 149628, 219972, 84166, 717, 941, 3587, 131450, 930, 3394, 11274, 51284, 10673, 4283, 4332, 81622, 10561, 7124, 4680, 64108, 3434, 8638, 55655, 9636, 81793, 84639, 4939, 25939, 972
ASPIRIN	C0004057	0.000812069	n/a	29	15.5172	220	HTATIP2, ITGAL, MMP2, ADORA3, C7orf57, ALOX5, RETN, F3, ANGPT1, HVCN1, CX3CR1, FPR2, ITGAM, NAAA, RNASE3, GP1BA, F5, CCL24, LGALS13, S100A9, LILRB4, CYP4F2, PPARD, S100A8, CHST2, ALOX5AP, DCBLD2, MS4A2, CES1	10553, 3683, 4313, 140, 136288, 240, 56729, 2152, 284, 84329, 1524, 2358, 3684, 27163, 6037, 2811, 2153, 6369, 29124, 6280, 11006, 8529, 5467, 6279, 9435, 241, 131566, 2206, 1066
IMMUNOLOGIC ADJUVANTS	C0001551	0.000108906	n/a	28	13.1191	186	NOD2, FPR3, TLR3, TLR8, CLEC4E, UPK3A, GCHFR, CD80, CR1, TLR7, CLEC12A, PRAME, TNFSF13B, CLEC7A, PRTN3, TLR5, GPR18, CLEC4D, CD1C, CD4, TAC4, CD86, CD1D, CCR6, FAS-AS1, ISG15, RBP3, MARCO	64127, 2359, 7098, 51311, 26253, 7380, 2644, 941, 1378, 51284, 160364, 23532, 10673, 64581, 5657, 7100, 2841, 338339, 911, 920, 255061, 942, 912, 1235, 100302740, 9636, 5949, 8685
HEPATITIS B SURFACE ANTIGENS	C0019168	0.000268685	n/a	28	13.8244	196	CLC, TLR3, MX1, FCGR2B, HLA-DPA1, TLR8, ASGR1, CD80, TLR7, IL23R, MYCL, CD68, BACE2, EPHX1, HLA-DPB1, ALB, B3GAT1, CD4, SERPINA1, TAC4, SLC16A9, ANXA2, HAVCR2, CD86, MS4A2, ISG15, CD14, CD1A	1178, 7098, 4599, 2213, 3113, 51311, 432, 941, 51284, 149233, 4610, 968, 25825, 2052, 3115, 213, 27087, 920, 5265, 255061, 220963, 302, 84868, 942, 2206, 9636, 929, 909
UROKINASE	C0042071	0.000292754	n/a	28	13.895	197	ROBO1, CD59, THBD, PLG, ITGAV, SERPINB8, TIMP1, MMP2, VLDLR, RETN, F3, OSM, TFPI2, TFPI, SERPINB2, RAB31, PON2, FPR2, LRP1, LRP1B, F5, LPXN, F8, SERPINA1, SERPINE1, ANXA2, FCGR3B, KIAA0319	6091, 966, 7056, 5340, 3685, 5271, 7076, 4313, 7436, 56729, 2152, 5008, 7980, 7035, 5055, 11031, 5445, 2358, 4035, 53353, 2153, 9404, 2157, 5265, 5054, 302, 2215, 9856
ALL TRANS RETINOL	C0087161	0.00147744	n/a	28	15.3761	218	CST3, PTGDS, GLRX, SERPINF1, PDZD3, GPRC5A, HSD17B6, EYA2, RETN, HLA-DQB1, RBP4, RBP1, EFHD1, PDC, DHRS9, ALB, HPR, RXRA, DHRS3, SERPINA1, SCGB1A1, UMOD, MAK, NTM, CKM, CES1, RBP3, HAVCR1	1471, 5730, 2745, 5176, 79849, 9052, 8630, 2139, 56729, 3119, 5950, 5947, 80303, 5132, 10170, 213, 3250, 6256, 9249, 5265, 7356, 7369, 4117, 50863, 1158, 1066, 5949, 26762
ADRENAL CORTEX HORMONES	C0001617	0.00169629	n/a	28	15.5172	220	CCL17, NLRP12, CST3, KHDRBS3, SIGLEC5, KLF4, EPX, TDO2, RNASE2, VNN1, PM20D1, TNFSF13B, CXCL9, LY9, PRTN3, VIPR2, MYH11, RNASE3, CCL24, CD4, ENC1, SCGB1A1, PCDH19, MS4A2, CD180, IL1RN, UTS2, HRH1	6361, 91662, 1471, 10656, 8778, 9314, 8288, 6999, 6036, 8876, 148811, 10673, 4283, 4063, 5657, 7434, 4629, 6037, 6369, 920, 8507, 7356, 57526, 2206, 4064, 3557, 10911, 3269
SERPINS	C0036764	0.00556388	n/a	28	16.8573	239	HNF1B, THBD, PLG, SERPINB8, TIMP1, SERPINI2, SERPINF1, VSIG4, VLDLR, ST14, OSM, SERPINB2, SERPINB9, PRTN3, CRNN, LRP1, EPHX1, SERPINA1, S100A8, SERPINE1, EPOR, IFIT1, SERPINH1, ANXA2, HAVCR2, SERPIND1, CSTA, TFR2	6928, 7056, 5340, 5271, 7076, 5276, 5176, 11326, 7436, 6768, 5008, 5055, 5272, 5657, 49860, 4035, 2052, 5265, 6279, 5054, 2057, 3434, 871, 302, 84868, 3053, 1475, 7036
HYALURONAN	C0813622	0.000373823	n/a	27	13.4012	190	LY96, SMAD1, STAB1, TIMP1, SERPINF1, NCAN, ITIH3, FIGF, MMP13, OSM, STAB2, CXCL9, PRTN3, CD93, PDPN, RNASE3, HAPLN4, ALB, GNPDA1, TNFAIP6, LYVE1, MSLN, FRMD4A, SMPD3, NAT8, PECAM1, SIGLEC9	23643, 4086, 23166, 7076, 5176, 1463, 3699, 2277, 4322, 5008, 55576, 4283, 5657, 22918, 10630, 6037, 404037, 213, 10007, 7130, 10894, 10232, 55691, 55512, 9027, 5175, 27180
CHLOROQUINE	C0008269	0.00141669	n/a	27	14.6003	207	CAPN3, SNX11, TLR3, HNMT, CHST15, TLR8, CTSS, DSC2, LDLR, CDH5, LIPA, TLR7, SLC22A2, TNFSF13B, MLLT11, LRP1, CD1C, TIGAR, CD4, SLC30A1, KCNJ11, CYP2C8, MCOLN1, LGALS3BP, CD86, GRN, CES1	825, 29916, 7098, 3176, 51363, 51311, 1520, 1824, 3949, 1003, 3988, 51284, 6582, 10673, 10962, 4035, 911, 57103, 920, 7779, 3767, 1558, 57192, 3959, 942, 2896, 1066
PROSTAGLANDINS	C0033554	0.00386537	n/a	27	15.6583	222	KAZALD1, PRG2, PTGDS, UCN, ATP1A2, KNG1, PLA2G10, ALOX5, GPR68, FIGF, RNASE2, FPR2, ACOX2, RNASE3, P2RY6, DHRS9, GPR162, TNFAIP6, EDDM3B, TNF, PPARD, TAC4, S100A8, ALOX5AP, PTGR2, AKR1B1, IL1RN	81621, 5553, 5730, 7349, 477, 3827, 8399, 240, 8111, 2277, 6036, 2358, 8309, 6037, 5031, 10170, 27239, 7130, 64184, 7124, 5467, 255061, 6279, 241, 145482, 231, 3557
ACETYL LDL	C0050486	8.27583e-08	n/a	26	8.11127	115	HSPB1, ITGAV, STAB1, LGALS3, LDLR, CDH5, CR1, TAGLN, APOF, FCER1G, STAB2, ACAT1, CD36, PDPN, ALB, LYVE1, F8, PLTP, UMOD, SERPINE1, CES1, CETP, CD14, CFP, PECAM1, MARCO	3315, 3685, 23166, 3958, 3949, 1003, 1378, 6876, 319, 2207, 55576, 38, 948, 10630, 213, 10894, 2157, 5360, 7369, 5054, 1066, 1071, 929, 5199, 5175, 8685
HYDROXYMETHYLGLUTARYL COA REDUCTASE INHIBITORS	C0360714	0.00125001	n/a	26	13.7539	195	CD59, CYP46A1, CLCN1, THBD, ITGAL, KLF4, LDLR, KL, RETN, LIPA, ABCG2, NPC1L1, APOC2, GPR183, LRP1, CD36, CYBB, PSRC1, CXCL16, WNK2, CYP4F2, PLTP, SERPINE1, NR1I2, CETP, ISG15	966, 10858, 1180, 7056, 3683, 9314, 3949, 9365, 56729, 3988, 9429, 29881, 344, 1880, 4035, 948, 1536, 84722, 58191, 65268, 8529, 5360, 5054, 8856, 1071, 9636
VON WILLEBRAND FACTOR	C0042971	1.5847e-07	n/a	25	7.82914	111	MAG, THBD, PLG, HLA-DPA1, CR2, UPK3A, CDH5, F3, TFPI, S100A1, ENO2, CD68, PDPN, GP1BA, F5, S100A9, S100B, B3GAT1, F8, SERPINA1, SERPINE1, SLC4A3, CD14, PECAM1, CD1A	4099, 7056, 5340, 3113, 1380, 7380, 1003, 2152, 7035, 6271, 2026, 968, 10630, 2811, 2153, 6280, 6285, 27087, 2157, 5265, 5054, 6508, 929, 5175, 909
SEPTA	C0723285	0.000236013	n/a	24	11.0031	156	ENTPD1, PRG2, POU4F1, TIMP1, NCAN, KIT, HLA-DQB1, MMP13, TAGLN, CD68, RBP1, PDPN, FAP, NOTCH4, SLC18A3, NT5E, B3GAT1, MAP1A, PDGFRA, SERPINH1, CD14, PECAM1, CD1A, CD74	953, 5553, 5457, 7076, 1463, 3815, 3119, 4322, 6876, 968, 5947, 10630, 2191, 4855, 6572, 4907, 27087, 4130, 5156, 871, 929, 5175, 909, 972
RECOMBINANT UROKINASE	C1522670	0.000418985	n/a	24	11.4263	162	C5AR1, ROBO1, CD59, THBD, PLG, ITGAV, TIMP1, MMP2, VLDLR, OSM, TFPI2, SERPINB2, RAB31, PON2, FPR2, LRP1, ITGAM, LRP1B, CDH13, LPXN, SERPINE1, MELTF, CD14, FCGR3B	728, 6091, 966, 7056, 5340, 3685, 7076, 4313, 7436, 5008, 7980, 5055, 11031, 5445, 2358, 4035, 3684, 53353, 1012, 9404, 5054, 4241, 929, 2215
PREDNISOLONE	C0032950	0.00536955	n/a	24	13.7539	195	CCL17, C5AR1, SMAD1, ENTPD1, SLC26A4, CSF3, STAB1, CR1, EPX, ITGAM, RNASE3, S100A9, TNFAIP6, CD4, F8, SPIB, S100A8, ANXA2, NR1I2, IL1RN, CD14, PECAM1, GCSAM, HRH1	6361, 728, 4086, 953, 5172, 1440, 23166, 1378, 8288, 3684, 6037, 6280, 7130, 920, 2157, 6689, 6279, 302, 8856, 3557, 929, 5175, 257144, 3269
CHONDROITIN SULFATES	C0008466	0.00609545	n/a	24	13.895	197	MAG, CHST15, THBD, TIMP1, NRP1, NCAN, ST14, EPYC, S100A1, STAB2, LRP1, ANXA6, DPYSL3, TNFAIP6, BLNK, SLC34A1, B3GAT1, XYLT1, CHST2, CHD7, ANXA2, CHST12, CD180, KIAA0319	4099, 51363, 7056, 7076, 8829, 1463, 6768, 1833, 6271, 55576, 4035, 309, 1809, 7130, 29760, 6569, 27087, 64131, 9435, 55636, 302, 55501, 4064, 9856
DEXTRAN SULFATE	C0079224	1.28042e-05	n/a	22	8.04074	114	C5AR1, TGFBI, ENTPD1, PLG, ITGAL, LDLR, KNG1, PLA2G10, NRP1, RNASE1, F3, STAB2, CLEC1B, CXCL16, ALB, BLNK, CD4, PLTP, TREM2, CD14, CFP, PECAM1	728, 7045, 953, 5340, 3683, 3949, 3827, 8399, 8829, 6035, 2152, 55576, 51266, 58191, 213, 29760, 920, 5360, 54209, 929, 5199, 5175
INTRAVENOUS IMMUNOGLOBULIN	C0085297	2.96347e-05	n/a	22	8.46394	120	CST3, FCGR2B, CR2, ASGR1, IL10RA, CD19, CR1, RETN, FCER1G, TNFSF13B, FCGRT, FCGR2A, F5, S100A9, ALB, BLNK, CD4, F8, S100A8, IL1RN, FCGR2C, CD14	1471, 2213, 1380, 432, 3587, 930, 1378, 56729, 2207, 10673, 2217, 2212, 2153, 6280, 213, 29760, 920, 2157, 6279, 3557, 9103, 929
MINOCYCLINE	C0026187	0.000466259	n/a	22	10.1567	144	P2RY11, TIMP1, CD200R1, MMP2, ALOX5, CCR2, MMP13, PNOC, ARC, PRTN3, CD68, ITGAM, P2RY6, KMO, IL36B, TNF, TAC4, GPR65, HAVCR2, TNFSF12, IL1RN, IL1F10	5032, 7076, 131450, 4313, 240, 729230, 4322, 5368, 23237, 5657, 968, 3684, 5031, 8564, 27177, 7124, 255061, 8477, 84868, 8742, 3557, 84639
CPG ODN	C0914671	0.000983275	n/a	22	10.721	152	TLR3, CR2, TLR8, CD80, CD19, DOK2, RNASE2, MMP13, TLR7, TNFSF13B, TLR5, LRP1, UNC93B1, BLNK, CD4, SPIB, TNF, EGR1, CD86, CD1A, CCR1, MARCO	7098, 1380, 51311, 941, 930, 9046, 6036, 4322, 51284, 10673, 7100, 4035, 81622, 29760, 920, 6689, 7124, 1958, 942, 909, 1230, 8685
RECOMBINANT ALPHA CHEMOKINE	C1527035	0.00357423	n/a	22	11.8495	168	CCL17, C5AR1, CCR4, CXCR2, CCR2, OSM, IL23R, CXCL9, FPR2, MNDA, TLR5, GPR15, P2RY6, CXCL16, CCL24, IL36B, CD4, NLRC4, CCR6, CCR1, TNFRSF11A, CD74	6361, 728, 1233, 3579, 729230, 5008, 149233, 4283, 2358, 4332, 7100, 2838, 5031, 58191, 6369, 27177, 920, 58484, 1235, 1230, 8792, 972
ANGIOGENESIS INHIBITORS	C0596087	0.00862633	n/a	22	12.7664	181	HTATIP2, PLG, ITGAV, STAB1, TIMP1, MYCN, DOCK1, SERPINF1, TYMP, NRP1, MMP2, THBS4, COL4A1, KIT, ANGPT1, DLL4, BAIAP2L1, RRAD, RNH1, TNMD, FAS-AS1, PECAM1	10553, 5340, 3685, 23166, 7076, 4613, 1793, 5176, 1890, 8829, 4313, 7060, 1282, 3815, 284, 54567, 55971, 6236, 6050, 64102, 100302740, 5175
RECOMBINANT INTERFERON ALPHA INDUCIBLE PROTEIN 10	C1522712	5.06145e-06	n/a	21	7.05328	100	CCL17, CSF3, IL13RA2, CDH3, CTSS, IL10RA, CXCR2, LTK, CCR2, RETN, CX3CR1, TNFSF13B, CXCL9, CXCL16, NCR1, TNF, GRN, ISG15, IL1RN, CD14, NGB	6361, 1440, 3598, 1001, 1520, 3587, 3579, 4058, 729230, 56729, 1524, 10673, 4283, 58191, 9437, 7124, 2896, 9636, 3557, 929, 58157
CARRAGEENAN	C0007289	0.00043931	n/a	21	9.45139	134	GALR1, LGALS3, QRFPR, UCN, NPB, KNG1, FAAH, ALOX5, PNOC, NAAA, S100A9, TNFAIP6, TNF, HTR3A, EGR1, TNFSF8, GALR2, NLRC4, IL1RN, FAM19A4, CCR1	2587, 3958, 84109, 7349, 256933, 3827, 2166, 240, 5368, 27163, 6280, 7130, 7124, 3359, 1958, 944, 8811, 58484, 3557, 151647, 1230
RITUXIMAB	C0393022	0.00115044	n/a	21	10.1567	144	POU3F3, CD59, MAG, CSF3, FCGR2B, CR2, PEBP4, CD80, CD19, TNFSF13B, PRTN3, BCL2A1, CD33, CD68, FCGR2A, F5, BLNK, F8, TNF, HLA-DRA, FCGR3B	5455, 966, 4099, 1440, 2213, 1380, 157310, 941, 930, 10673, 5657, 597, 945, 968, 2212, 2153, 29760, 2157, 7124, 3122, 2215
SERINE PROTEINASE INHIBITORS	C0036733	0.00565581	n/a	21	11.5674	164	PLG, SERPINI2, SERPINF1, ST14, CTSH, TFPI2, TFPI, SERPINB2, SERPINB9, PRTN3, SPINT2, LRP1, CDH13, FAP, WFDC1, IFI44, KLK14, SERPINA1, SERPINE1, SERPIND1, FCGR3B	5340, 5276, 5176, 6768, 1512, 7980, 7035, 5055, 5272, 5657, 10653, 4035, 1012, 2191, 58189, 10561, 43847, 5265, 5054, 3053, 2215
ENDOGLYCOSIDASES	C3537242	0.00964435	n/a	21	12.1316	172	CD59, CDH2, CNTNAP1, ASGR1, SRL, ST14, RNASE2, CXXC5, MMEL1, LRP1, FCGRT, NAAA, SLC51A, DBH, MYBPH, CD4, SERPINA1, EPOR, SERPINH1, CD1B, SLC51B	966, 1000, 8506, 432, 6345, 6768, 6036, 51523, 79258, 4035, 2217, 27163, 200931, 1621, 4608, 920, 5265, 2057, 871, 910, 123264
BUDESONIDE	C0054201	5.06088e-05	n/a	20	7.54701	107	CCL17, CSF2RA, TIMP1, IL5RA, EPX, CXCR2, RNASE2, TLR7, SLC22A2, ITGAM, KIR2DL2, RNASE3, CCL24, SLC26A3, NCR1, CEBPE, TNF, MS4A2, NR1I2, IL1RN	6361, 1438, 7076, 3568, 8288, 3579, 6036, 51284, 6582, 3684, 3803, 6037, 6369, 1811, 9437, 1053, 7124, 2206, 8856, 3557
BETA GLUCANS	C1134651	9.86874e-05	n/a	20	7.89967	112	NOD2, CST3, LGALS3, PTPRJ, CD80, CR1, FCER1G, IL23R, CLEC7A, TLR5, CD36, ITGAM, PDPN, CLEC4D, TNF, CD86, IL1RN, CD14, FCGR3B, CFP	64127, 1471, 3958, 5795, 941, 1378, 2207, 149233, 64581, 7100, 948, 3684, 10630, 338339, 7124, 942, 3557, 929, 2215, 5199
POLY I C	C0032414	0.00122578	n/a	20	9.52193	135	CCL17, TLR3, MX1, TLR8, IL13RA2, SEMA4A, NLRC5, CD80, IRF8, TLR7, CX3CR1, TLR5, CXCL16, CD300LB, TNF, IFIT1, CD86, CD300LF, ISG15, CD74	6361, 7098, 4599, 51311, 3598, 64218, 84166, 941, 3394, 51284, 1524, 7100, 58191, 124599, 7124, 3434, 942, 146722, 9636, 972
RECOMBINANT MACROPHAGE COLONY STIMULATING FACTOR	C1524095	0.00248059	n/a	20	10.0862	143	CSF3, LGALS3, CCR2, IRF8, OSM, CXCL9, CD68, ITGAM, CCL24, TSPAN16, EDDM3B, TNF, OSCAR, TREM2, TYROBP, IL1RN, CD14, IL1F10, TNFRSF11A, SIGLEC9	1440, 3958, 729230, 3394, 5008, 4283, 968, 3684, 6369, 26526, 64184, 7124, 126014, 54209, 7305, 3557, 929, 84639, 8792, 27180
FACTOR XIII	C0015528	1.81628e-05	n/a	19	6.48902	92	HNF1B, CDA, THBD, NLRP12, PLG, IL5RA, NAGA, F3, TFPI, SERPINB2, VIPR2, CD68, F5, S100A9, ALB, F8, SERPINA1, SERPINE1, CD1A	6928, 978, 7056, 91662, 5340, 3568, 4668, 2152, 7035, 5055, 7434, 968, 2153, 6280, 213, 2157, 5265, 5054, 909
LIPOPEPTIDES	C2266975	2.50109e-05	n/a	19	6.63008	94	CDA, NOD2, LY96, TLR3, CD80, DOK2, TLR7, FPR2, TLR5, CD1C, S100B, BLNK, CD4, TNF, CD86, CD1D, TLR10, CD14, CD1A	978, 64127, 23643, 7098, 941, 9046, 51284, 2358, 7100, 911, 6285, 29760, 920, 7124, 942, 912, 81793, 929, 909
BISPECIFIC ANTIBODY	C0206492	9.31952e-05	n/a	19	7.26488	103	CD59, CSF3, ITGAL, TACSTD2, CD19, TFPI, DLL4, CD33, FCAR, FCGRT, FCGR2A, CCND1, FAP, IGF1R, CD4, F8, FAS-AS1, FCGR3B, CD74	966, 1440, 3683, 4070, 930, 7035, 54567, 945, 2204, 2217, 2212, 595, 2191, 3480, 920, 2157, 100302740, 2215, 972
FUCOIDAN	C0060794	0.00142767	n/a	19	8.95767	127	PLG, AZU1, NRP1, MMP2, UGT8, F3, TFPI, APOC2, CD36, ITGAM, CLEC1B, CCND1, TNF, ANXA2, CD86, SERPIND1, CD14, CFP, MARCO	5340, 566, 8829, 4313, 7368, 2152, 7035, 344, 948, 3684, 51266, 595, 7124, 302, 942, 3053, 929, 5199, 8685
IMIQUIMOD	C0165032	0.00142767	n/a	19	8.95767	127	CCL17, TLR3, MX1, TLR8, CD80, IL1RL2, CXCR2, OSM, TLR7, TLR5, IL36B, CD4, TNF, CD86, CCR6, CSTA, IL1RN, CD14, IL1F10	6361, 7098, 4599, 51311, 941, 8808, 3579, 5008, 51284, 7100, 27177, 920, 7124, 942, 1235, 1475, 3557, 929, 84639
HUMAN IMMUNOGLOBULIN A	C2825347	0.00172106	n/a	19	9.09873	129	SIGLEC5, LILRA2, CD19, FCER1G, TNFSF13B, HLA-DQA1, PRTN3, TLR5, ITGAM, FCAR, FCGRT, HLA-DPB1, ALB, CD4, SERPINA1, SCGB1A1, OASL, STATH, CD14	8778, 11027, 930, 2207, 10673, 3117, 5657, 7100, 3684, 2204, 2217, 3115, 213, 920, 5265, 7356, 8638, 6779, 929
METHYLPREDNISOLONE	C0025815	0.00225588	n/a	19	9.31033	132	HNMT, SLC26A4, THBD, CSF3, CST3, ITGAL, TIMP1, IL10RA, ENO2, TNFSF13B, CXCL9, CD68, ITGAM, NCR1, CD4, F8, TNF, RIMS1, IL1RN	3176, 5172, 7056, 1440, 1471, 3683, 7076, 3587, 2026, 10673, 4283, 968, 3684, 9437, 920, 2157, 7124, 22999, 3557
BLOOD COAGULATION FACTOR	C0005789	0.00476066	n/a	19	9.94512	141	THBD, PLG, CNTNAP1, SERPINB8, CYP2C18, NRP1, COL4A1, F3, TFPI2, TFPI, PRTN3, LRP1, GP1BA, F5, ALB, B3GAT1, F8, SERPINA1, SERPINE1	7056, 5340, 8506, 5271, 1562, 8829, 1282, 2152, 7980, 7035, 5657, 4035, 2811, 2153, 213, 27087, 2157, 5265, 5054
PLASMINOGEN ACTIVATOR	C0032144	0.00476066	n/a	19	9.94512	141	CDH2, THBD, PLG, SERPINB8, TIMP1, MMP2, VLDLR, RETN, F3, TFPI, SERPINB2, SCGB2A2, LRP1, F5, F8, SERPINA1, SERPINE1, ANXA2, KIAA0319	1000, 7056, 5340, 5271, 7076, 4313, 7436, 56729, 2152, 7035, 5055, 4250, 4035, 2153, 2157, 5265, 5054, 302, 9856
THERAPEUTIC TUMOR INFILTRATING LYMPHOCYTES	C1515408	0.00598571	n/a	19	10.1567	144	STAB1, ITGAL, HOXA9, UPK3A, CD80, HLA-DQB1, LILRB2, IL23R, CD68, CXCL16, NCR1, B3GAT1, CD4, CEACAM6, HAVCR2, CD86, CCR6, HLA-DRA, HHLA2	23166, 3683, 3205, 7380, 941, 3119, 10288, 149233, 968, 58191, 9437, 27087, 920, 4680, 84868, 942, 1235, 3122, 11148
PROTEIN KINASE C INHIBITOR	C1514555	0.00801076	n/a	19	10.4389	148	HSPB1, CD59, AGXT, ITGAL, IER3, KNG1, CLCN5, PADI2, OSM, NEDD9, NCF4, ENC1, EGR1, PROK2, LGALS3BP, RIT2, CD14, PECAM1, UTS2	3315, 966, 189, 3683, 8870, 3827, 1184, 11240, 5008, 4739, 4689, 8507, 1958, 60675, 3959, 6014, 929, 5175, 10911
MANNANS	C0024727	9.87867e-05	n/a	18	6.70062	95	C5AR1, NOD2, CR2, LGALS3, CLEC4E, C2, CR1, FCN3, S100A1, CLEC7A, MNDA, ITGAM, CLEC4D, CD4, TNF, CD14, CFP, CD1A	728, 64127, 1380, 3958, 26253, 717, 1378, 8547, 6271, 64581, 4332, 3684, 338339, 920, 7124, 929, 5199, 909
ULEX EUROPAEUS FLOWER EXTRACT	C3486655	0.000171064	n/a	18	6.98275	99	THBD, ITGAV, CDH5, KIT, S100A1, ENO2, CD36, PDPN, S100A9, SCG5, B3GAT1, F8, SERPINA1, UMOD, CD14, PECAM1, CD1A, TNFRSF11A	7056, 3685, 1003, 3815, 6271, 2026, 948, 10630, 6280, 6447, 27087, 2157, 5265, 7369, 929, 5175, 909, 8792
TETANUS TOXOID ADSORBED	C0305062	0.000411712	n/a	18	7.47648	106	CD80, CD200R1, CD19, TNFSF13B, CLEC7A, TLR5, CD1C, IL36B, BLNK, CD4, CACNA2D4, CD1B, CD86, MS4A2, RIT2, CD14, FCGR3B, CD1A	941, 131450, 930, 10673, 64581, 7100, 911, 27177, 29760, 920, 93589, 910, 942, 2206, 6014, 929, 2215, 909
APROTININ	C0003641	0.000582546	n/a	18	7.68807	109	THBD, CST3, PLG, TIMP1, AZU1, KNG1, CDH5, ST14, RNASE1, F3, TFPI2, TFPI, SPINT2, LRP1, ITGAM, F5, SERPINA1, SERPINE1	7056, 1471, 5340, 7076, 566, 3827, 1003, 6768, 6035, 2152, 7980, 7035, 10653, 4035, 3684, 2153, 5265, 5054
AMPHOTERICIN B	C0002679	0.000727672	n/a	18	7.82914	111	HNMT, CSF3, TLR8, IL10RA, GAS1, RNASE2, ITGAM, EFS, GP1BA, ALB, CD4, TNF, SERPINA1, PLTP, UMOD, IL1RN, CD14, HAVCR1	3176, 1440, 51311, 3587, 2619, 6036, 3684, 10278, 2811, 213, 920, 7124, 5265, 5360, 7369, 3557, 929, 26762
TOLONIUM CHLORIDE	C0040380	0.000902771	n/a	18	7.97021	113	CCL17, C5AR1, CSF2RA, MAG, PRG2, ITGAV, POU4F1, TIMP1, NPB, KIT, MMP13, ENO2, CD33, CD68, ITGAM, HAVCR2, CD14, PECAM1	6361, 728, 1438, 4099, 5553, 3685, 5457, 7076, 256933, 3815, 4322, 2026, 945, 968, 3684, 84868, 929, 5175
EPOPROSTENOL	C0033567	0.00165896	n/a	18	8.3934	119	KCNN3, ENTPD1, THBD, PTGDS, KLF4, PDZD3, KNG1, CDH5, GPR68, F3, TFPI, ANGPT1, GP1BA, PPARD, SERPINE1, SERPIND1, PECAM1, UTS2	3782, 953, 7056, 5730, 9314, 79849, 3827, 1003, 8111, 2152, 7035, 284, 2811, 5467, 5054, 3053, 5175, 10911
METHACHOLINE	C0600370	0.00315911	n/a	18	8.88713	126	CCL17, PRG2, NLRP12, IL13RA2, KNG1, IL5RA, EPX, NPPA, CXCR2, RNASE2, MYH11, RNASE3, CDH13, CTNNA3, CCL24, WFDC1, ALB, MS4A2	6361, 5553, 91662, 3598, 3827, 3568, 8288, 4878, 3579, 6036, 4629, 6037, 1012, 29119, 6369, 58189, 213, 2206
MONOPHOSPHORYL LIPID A	C0066776	6.2762e-06	n/a	17	5.00783	71	NOD2, LY96, TLR3, CLEC4E, CD80, CD200R1, TLR7, TLR5, CXCL16, LILRB4, CD4, CALCB, TNF, HAVCR2, CD86, KYNU, CD14	64127, 23643, 7098, 26253, 941, 131450, 51284, 7100, 58191, 11006, 920, 797, 7124, 84868, 942, 8942, 929
CYTOCHALASIN B	C0010737	0.000403536	n/a	17	6.84168	97	PRG2, ITGAL, CR1, EPX, RNASE2, NEDD9, FPR2, MMEL1, ITGAM, RNASE3, GP1BA, CDH13, CD1C, VNN2, SLC2A8, CD14, FCGR3B	5553, 3683, 1378, 8288, 6036, 4739, 2358, 79258, 3684, 6037, 2811, 1012, 911, 8875, 29988, 929, 2215
VALSARTAN	C0216784	0.000921868	n/a	17	7.33541	104	ITGAV, ACE2, LGALS3, TIMP1, NCF2, KL, RETN, CYBA, MAS1L, GP1BA, CYBB, ALB, CLTCL1, SERPINE1, EGR1, CYP2C8, AGTRAP	3685, 59272, 3958, 7076, 4688, 9365, 56729, 1535, 116511, 2811, 1536, 213, 8218, 5054, 1958, 1558, 57085
TETANUS VACCINE	C0039620	0.00114732	n/a	17	7.47648	106	CD80, CD200R1, CD19, TNFSF13B, CLEC7A, TLR5, CD1C, BLNK, CD4, CACNA2D4, CD1B, CD86, MS4A2, RIT2, CD14, FCGR3B, CD1A	941, 131450, 930, 10673, 64581, 7100, 911, 29760, 920, 93589, 910, 942, 2206, 6014, 929, 2215, 909
MERBROMIN	C0025397	0.0014179	n/a	17	7.61754	108	CD59, CSF2RA, KCNN3, CR2, CD19, CR1, KIT, DNTT, B3GAT1, CD4, SLC11A1, MECOM, MCOLN1, CD86, CD101, CD14, CCR1	966, 1438, 3782, 1380, 930, 1378, 3815, 1791, 27087, 920, 6556, 2122, 57192, 942, 9398, 929, 1230
IMMUNOTOXINS	C0021084	0.00282581	n/a	17	8.11127	115	ASGR1, IL13RA2, CD80, TACSTD2, CD19, CD1E, CD33, FAP, HLA-DPB1, DBH, SLC18A3, CD4, MSLN, GPNMB, TNFSF8, CD86, CD14	432, 3598, 941, 4070, 930, 913, 945, 2191, 3115, 1621, 6572, 920, 10232, 10457, 944, 942, 929
ANTIPLASMIN	C0003410	6.44602e-06	n/a	16	4.5141	64	THBD, CST3, PLG, CLEC4E, VLDLR, F3, TFPI, SERPINB2, FAP, F5, TNFAIP6, KLK14, F8, SERPINA1, SERPINE1, SERPIND1	7056, 1471, 5340, 26253, 7436, 2152, 7035, 5055, 2191, 2153, 7130, 43847, 2157, 5265, 5054, 3053
RICINUS COMMUNIS WHOLE EXTRACT	C3537211	3.81417e-05	n/a	16	5.14889	73	SLAMF6, DGAT2, GLRX, SUCLG2, NAGA, FBXO6, ENO2, CD68, ITGAM, S100A9, ALB, B3GAT1, F8, UMOD, PDGFRA, CD86	114836, 84649, 2745, 8801, 4668, 26270, 2026, 968, 3684, 6280, 213, 27087, 2157, 7369, 5156, 942
INDIUM BLEOMYCIN	C0063476	0.00116702	n/a	16	6.84168	97	MGAT5, CCR4, IL13RA2, TIMP1, CD80, DDAH1, ANGPT1, FPR2, CD36, PDPN, NT5E, S100A8, SERPINE1, SERPINH1, CD86, CCR1	4249, 1233, 3598, 7076, 941, 23576, 284, 2358, 948, 10630, 4907, 6279, 5054, 871, 942, 1230
BICUCULLINE	C0005372	0.0022237	n/a	16	7.26488	103	HTR6, TSPO, KCNN3, PTGDS, QRFPR, NPB, ADORA3, HCRTR2, PNOC, GPHN, MNDA, VIPR2, PRSS50, UMOD, EGR1, KIAA0319	3362, 706, 3782, 5730, 84109, 256933, 140, 3062, 5368, 10243, 4332, 7434, 29122, 7369, 1958, 9856
TRYPTOPHAN	C0041249	0.0022237	n/a	16	7.26488	103	CDH2, NLRP12, ACE2, ITGAL, SUCLG2, TDO2, MYOF, RNASE2, DYSF, KMO, ALB, ENTPD3, ADARB1, KYNU, NLRP2, CFP	1000, 91662, 59272, 3683, 8801, 6999, 26509, 6036, 8291, 8564, 213, 956, 104, 8942, 55655, 5199
PROTEASE INHIBITORS	C0033607	0.00271757	n/a	16	7.40594	105	CST3, PLG, TIMP1, KNG1, NPPA, TFPI2, PNOC, PRTN3, CRNN, CALCB, SERPINA1, SERPINE1, GRM2, HAVCR2, CSTA, CCR1	1471, 5340, 7076, 3827, 4878, 7980, 5368, 5657, 49860, 797, 5265, 5054, 2912, 84868, 1475, 1230
HEPARIN SEPHAROSE	C0062515	0.00619633	n/a	16	8.04074	114	PRG2, AZU1, VLDLR, THBS4, RNASE2, TFPI2, TFPI, APOC2, FGF8, SERPINB9, LIPC, PLTP, SERPINE1, SERPIND1, GRN, PECAM1	5553, 566, 7436, 7060, 6036, 7980, 7035, 344, 2253, 5272, 3990, 5360, 5054, 3053, 2896, 5175
PROSTAGLANDINS I	C0205911	0.00732322	n/a	16	8.1818	116	KCNN3, ENTPD1, THBD, PTGDS, KLF4, PDZD3, KNG1, CDH5, F3, TFPI, ANGPT1, PPARD, SERPINE1, SERPIND1, PECAM1, UTS2	3782, 953, 7056, 5730, 9314, 79849, 3827, 1003, 2152, 7035, 284, 5467, 5054, 3053, 5175, 10911
FLUVASTATIN	C0082608	0.00860893	n/a	16	8.32287	118	CLCN1, THBD, ITGAL, LDLR, TFPI, CYBA, ABCG2, CCND1, NCR1, CD4, PPARD, CLTCL1, SERPINE1, CYP2C8, CETP, PECAM1	1180, 7056, 3683, 3949, 7035, 1535, 9429, 595, 9437, 920, 5467, 8218, 5054, 1558, 1071, 5175
GAMMA GLOBULIN SERUM	C0305052	1.79277e-06	n/a	15	3.66771	52	TLR3, MX1, HTATIP2, CD80, CD19, MX2, TBC1D9, USP18, ZNF395, TLR7, TNFSF13B, IFI44, IFIT1, LGALS3BP, ISG15	7098, 4599, 10553, 941, 930, 4600, 23158, 11274, 55893, 51284, 10673, 10561, 3434, 3959, 9636
HIRUDINS	C1451270	2.34868e-05	n/a	15	4.44357	63	ENTPD1, THBD, PLG, TIMP1, CDH5, F3, TFPI, HVCN1, GP1BA, F5, F8, SERPINA1, SERPINE1, CD86, SERPIND1	953, 7056, 5340, 7076, 1003, 2152, 7035, 84329, 2811, 2153, 2157, 5265, 5054, 942, 3053
HIRUDIN	C0019573	2.34868e-05	n/a	15	4.44357	63	ENTPD1, THBD, PLG, TIMP1, CDH5, F3, TFPI, HVCN1, GP1BA, F5, F8, SERPINA1, SERPINE1, CD86, SERPIND1	953, 7056, 5340, 7076, 1003, 2152, 7035, 84329, 2811, 2153, 2157, 5265, 5054, 942, 3053
OLIGOADENYLATE	C0133819	0.000358923	n/a	15	5.57209	79	MX1, CTSS, MX2, IRF8, TLR7, APOF, CXCL9, HLA-DQA1, SLC30A1, IFIT1, DCBLD2, OASL, AKAP7, ISG15, OAS2	4599, 1520, 4600, 3394, 51284, 319, 4283, 3117, 7779, 3434, 131566, 8638, 9465, 9636, 4939
GLUCANS	C0017696	0.000913416	n/a	15	6.06582	86	CLEC7A, ITGAM, CLEC4D, MYBPH, TSPAN16, TNF, MGAM, LRG1, CD86, CYP51A1, GRN, CD101, CD14, CFP, CD1A	64581, 3684, 338339, 4608, 26526, 7124, 8972, 116844, 942, 1595, 2896, 9398, 929, 5199, 909
CHOLIC ACID	C0055568	0.00131312	n/a	15	6.27742	89	CPE, POU4F1, LDLR, GPBAR1, UGT8, ABCG2, APOC2, ACOX2, SH2B3, SLC51A, DHRS9, PLTP, NR1I2, CES1, HRH1	1363, 5457, 3949, 151306, 7368, 9429, 344, 8309, 10019, 200931, 10170, 5360, 8856, 1066, 3269
CHOLIC ACIDS	C0008404	0.00131312	n/a	15	6.27742	89	CPE, POU4F1, LDLR, GPBAR1, UGT8, ABCG2, APOC2, ACOX2, SH2B3, SLC51A, DHRS9, PLTP, NR1I2, CES1, HRH1	1363, 5457, 3949, 151306, 7368, 9429, 344, 8309, 10019, 200931, 10170, 5360, 8856, 1066, 3269
INFLIXIMAB	C0666743	0.00423441	n/a	15	7.05328	100	NOD2, IL12RB1, CD200R1, UGT8, RETN, IL23R, PRTN3, FCGRT, FCGR2A, BLNK, TNF, STEAP4, GRN, TLR10, IL1RN	64127, 3594, 131450, 7368, 56729, 149233, 5657, 2217, 2212, 29760, 7124, 79689, 2896, 81793, 3557
LOSARTAN	C0126174	0.00511472	n/a	15	7.19435	102	TGFBI, ACE2, TIMP1, DDAH1, KL, CYBA, NOXA1, ACY3, MAS1L, CYBB, UCP2, SERPINE1, CYP2C8, EDNRA, HAVCR1	7045, 59272, 7076, 23576, 9365, 1535, 10811, 91703, 116511, 1536, 7351, 5054, 1558, 1909, 26762
CARDIAC GLYCOSIDES	C0007158	0.00797727	n/a	15	7.54701	107	ASGR1, TYMP, ZNRF2, NAGA, ENO2, TLX2, CLEC7A, CD36, GPR18, NPL, S100B, B3GAT1, ATP1A3, AKR1B1, CD14	432, 1890, 223082, 4668, 2026, 3196, 64581, 948, 2841, 80896, 6285, 27087, 478, 231, 929
OXALATE	C3669135	0.00942842	n/a	15	7.68807	109	SUGCT, AGXT, SLC26A9, SLC26A4, SLC26A8, CLCN5, ITIH3, TRPM8, SLC26A3, ALB, SLC26A7, UMOD, EGR1, PAOX, HAVCR1	79783, 189, 115019, 5172, 116369, 1184, 3699, 79054, 1811, 213, 115111, 7369, 1958, 196743, 26762
BCG VACCINE	C0004886	0.00942842	n/a	15	7.68807	109	CDKN1A, CLEC4E, CTSS, FCER1G, PAWR, CD1C, IL36B, CD4, SLC11A1, TNF, TNFSF8, CD1B, MS4A2, IL1RN, MARCO	1026, 26253, 1520, 2207, 5074, 911, 27177, 920, 6556, 7124, 944, 910, 2206, 3557, 8685
CHONDROITIN 4 SULFATE	C0086008	0.000580161	n/a	14	5.21943	74	CHST15, THBD, LGALS3, TIMP1, SERPINF1, CTSS, NRP1, NCAN, EPYC, CD36, LACRT, TNFAIP6, PROK2, KIAA0319	51363, 7056, 3958, 7076, 5176, 1520, 8829, 1463, 1833, 948, 90070, 7130, 60675, 9856
LOW MOLECULAR WEIGHT HEPARIN	C0019139	0.00113971	n/a	14	5.57209	79	THBD, PLG, AZU1, EPX, F3, TFPI2, TFPI, STAB2, F5, LGALS13, F8, LIPC, SERPINE1, SERPIND1	7056, 5340, 566, 8288, 2152, 7980, 7035, 55576, 2153, 29124, 2157, 3990, 5054, 3053
ADENOSINE TRIPHOSPHATE	C0001480	0.00186366	n/a	14	5.85422	83	P2RY11, ENTPD1, ABCA2, KNG1, DNTT, ABCG2, P2RY6, S100A9, HPR, NT5E, GAPDHS, ABCC6, KCNJ11, HAVCR1	5032, 953, 20, 3827, 1791, 9429, 5031, 6280, 3250, 4907, 26330, 368, 3767, 26762
RECOMBINANT IMMUNE GLOBULIN	C1527233	0.0020946	n/a	14	5.92475	84	CST3, FCGR2B, CR2, ASGR1, CR1, FCER1G, TNFSF13B, FCGRT, F5, ALB, BLNK, CD4, F8, SERPINA1	1471, 2213, 1380, 432, 1378, 2207, 10673, 2217, 2153, 213, 29760, 920, 2157, 5265
FIBRATES	C1449704	0.00493284	n/a	14	6.48902	92	CLCN1, FABP1, VLDLR, CXCR2, APOC2, RXRA, WNK2, UCP2, PPARD, PLTP, SERPINE1, LPCAT1, CYP2C8, CETP	1180, 2168, 7436, 3579, 344, 6256, 65268, 7351, 5467, 5360, 5054, 79888, 1558, 1071
MANNITOL	C0024730	0.00943505	n/a	14	6.98275	99	SLAMF6, AQP9, CLEC4E, NPPA, HLA-DQB1, ANGPT1, RNASE3, ALB, HPR, S100B, EDDM3B, SERPINA1, SCGB1A1, MS4A2	114836, 366, 26253, 4878, 3119, 284, 6037, 213, 3250, 6285, 64184, 5265, 7356, 2206
MEASLES VACCINE	C0025010	1.97222e-06	n/a	13	2.82131	40	TLR3, MX1, IL12RB1, TLR8, TLR7, HLA-DQA1, HLA-DMA, HLA-DPB1, RXRA, MYBPH, CD4, CD14, OAS2	7098, 4599, 3594, 51311, 51284, 3117, 3108, 3115, 6256, 4608, 920, 929, 4939
CEFTAZIDIME	C0007559	4.71045e-05	n/a	13	3.66771	52	CSF3, LILRA2, FGF8, GNS, GP1BA, F5, LILRB4, WFDC1, ALB, LILRB1, NPL, TNF, CFP	1440, 11027, 2253, 2799, 2811, 2153, 11006, 58189, 213, 10859, 80896, 7124, 5199
FACTOR VII	C0015502	0.00123902	n/a	13	5.00783	71	THBD, PLG, CYP2C18, F3, TFPI2, TFPI, EPHX1, GP1BA, F5, ALB, F8, SERPINE1, SERPIND1	7056, 5340, 1562, 2152, 7980, 7035, 2052, 2811, 2153, 213, 2157, 5054, 3053
ALLOPURINOL	C0002144	0.00264937	n/a	13	5.43103	77	CST3, HCP5, EPB41L2, MMP13, CD36, PNP, S100B, CYP4F2, EDDM3B, UMOD, MCOLN1, OTC, HAVCR1	1471, 10866, 2037, 4322, 948, 4860, 6285, 8529, 64184, 7369, 57192, 5009, 26762
CYSTEINYL LEUKOTRIENE	C0675175	0.00334101	n/a	13	5.57209	79	LILRA2, PLA2G10, CPA3, EPX, ALOX5, RNASE2, FCER1G, FPR2, RNASE3, CLEC4D, GGT5, ALOX5AP, MS4A2	11027, 8399, 1359, 8288, 240, 6036, 2207, 2358, 6037, 338339, 2687, 241, 2206
OLMESARTAN	C1098320	0.00417449	n/a	13	5.71316	81	FABP1, CST3, ACE2, NCF2, MMP2, CYBA, ABCG2, DLL4, MAS1L, CYBB, ALB, SERPINE1, AGTRAP	2168, 1471, 59272, 4688, 4313, 1535, 9429, 54567, 116511, 1536, 213, 5054, 57085
ARECOLINE	C0003753	0.00464915	n/a	13	5.78369	82	CCL17, CPE, HSPB1, CST3, CDKN1A, TIMP1, CHRM1, MGMT, MMP2, CMKLR1, SERPINE1, EGR1, SERPINH1	6361, 1363, 3315, 1471, 1026, 7076, 1128, 4255, 4313, 1240, 5054, 1958, 871
PARAFORM	C0070066	0.00516626	n/a	13	5.85422	83	CR1, KIT, TAGLN, PRTN3, ITGAM, EPHX1, RNASE3, PDC, CD4, MAP1A, CD1D, STATH, RBP3	1378, 3815, 6876, 5657, 3684, 2052, 6037, 5132, 920, 4130, 912, 6779, 5949
PITAVASTATIN	C1101838	0.00848271	n/a	13	6.20689	88	FABP1, THBD, UCN, KLF4, LDLR, KL, CCR2, RETN, ABCG2, CD36, CYBB, RXRA, CETP	2168, 7056, 7349, 9314, 3949, 9365, 729230, 56729, 9429, 948, 1536, 6256, 1071
PLASMIN INHIBITOR	C0032139	9.17406e-05	n/a	12	3.38557	48	THBD, PLG, TIMP1, CLEC4E, F3, TFPI, SERPINB2, F5, TNFAIP6, F8, SERPINA1, SERPINE1	7056, 5340, 7076, 26253, 2152, 7035, 5055, 2153, 7130, 2157, 5265, 5054
HLA DR ALPHA CHAINS	C0019763	0.000113792	n/a	12	3.45611	49	ITGAL, CD19, HLA-DQB1, CD68, FCGR2A, HLA-DPB1, SLC26A3, CD4, CD86, HLA-DRA, PECAM1, MARCO	3683, 930, 3119, 968, 2212, 3115, 1811, 920, 942, 3122, 5175, 8685
THERAPEUTIC CORYNEBACTERIUM PARVUM	C1522468	0.000517168	n/a	12	4.02037	57	CCL17, NOD2, HNMT, CD80, PRTN3, CXCL16, NCF4, CD4, TNF, IL1RN, CD14, CCR1	6361, 64127, 3176, 941, 5657, 58191, 4689, 920, 7124, 3557, 929, 1230
DILTIAZEM	C0012373	0.000610919	n/a	12	4.0909	58	CDH2, LDLR, KNG1, MMP2, NPPA, ABCG2, VNN1, DYSF, CYP4F2, SCG5, NR1I2, CD180	1000, 3949, 3827, 4313, 4878, 9429, 8876, 8291, 8529, 6447, 8856, 4064
COMPLEMENT INACTIVATING AGENTS	C1564892	0.000718513	n/a	12	4.16143	59	C5AR1, LY96, CD59, CR2, VSIG4, CR1, MSRB1, DYSF, CFHR4, CD14, CFP, MARCO	728, 23643, 966, 1380, 11326, 1378, 51734, 8291, 10877, 929, 5199, 8685
SODIUM SULFIDE	C0074770	0.00152354	n/a	12	4.5141	64	FCGR2B, ITGAL, CR2, CYBA, ITGAM, FCGR2A, TSPAN16, SLC34A1, MSLN, FCGR2C, FCGR3B, CFP	2213, 3683, 1380, 1535, 3684, 2212, 26526, 6569, 10232, 9103, 2215, 5199
MITOMYCINS	C0026254	0.00260629	n/a	12	4.79623	68	LY96, MX1, CSF3, CDKN1A, MX2, FIGF, IGF1R, CD4, MSLN, ADCY8, SERPINH1, CD1A	23643, 4599, 1440, 1026, 4600, 2277, 3480, 920, 10232, 114, 871, 909
DIGOXIN	C0012265	0.00295717	n/a	12	4.86676	69	CST3, EPAS1, ABCG2, SLC51A, CYP4F2, PPARD, NTM, NR1I2, RBP3, CSTA, CYP11A1, SLC51B	1471, 2034, 9429, 200931, 8529, 5467, 50863, 8856, 5949, 1475, 1583, 123264
POLYMYXIN B	C0032535	0.00377365	n/a	12	5.00783	71	LY96, CSN1S1, THBD, BPI, CR1, LIPA, TLR5, TNF, KLF5, CD86, IL1RN, CD14	23643, 1446, 7056, 671, 1378, 3988, 7100, 7124, 688, 942, 3557, 929
CYSTEINE PROTEINASE INHIBITORS	C0010658	0.00377365	n/a	12	5.00783	71	CST3, CST7, CTSS, CTSH, RNASE2, TAGLN, TUBA4A, XYLT1, SERPINA1, S100A8, CSTA, MARCH1	1471, 8530, 1520, 1512, 6036, 6876, 7277, 64131, 5265, 6279, 1475, 55016
ETANERCEPT	C0717758	0.00735821	n/a	12	5.43103	77	IL13RA2, DNTT, RGS10, TNFSF13B, CD68, FCGRT, FCGR2A, TNF, CCR6, TNFSF12, GRN, IL1RN	3598, 1791, 6001, 10673, 968, 2217, 2212, 7124, 1235, 8742, 2896, 3557
BACTERICIDAL PERMEABILITY INCREASING PROTEIN	C0052897	0.000222147	n/a	11	3.17398	45	AZU1, BPI, BPIFB4, PRTN3, CEBPE, PLTP, CD1B, STATH, CETP, IL1RN, CD14	566, 671, 149954, 5657, 1053, 5360, 910, 6779, 1071, 3557, 929
ALLERGENIC EXTRACT	C0440016	0.000334746	n/a	11	3.31504	47	SLAMF6, AGXT, PRG2, LGALS3, NCAN, EPX, CD4, SCGB1A1, LRG1, MS4A2, CD14	114836, 189, 5553, 3958, 1463, 8288, 920, 7356, 116844, 2206, 929
FACTOR VIIA	C0015505	0.000706248	n/a	11	3.59717	51	THBD, PLG, ASGR1, F3, TFPI2, TFPI, LRP1, FAP, F5, F8, SERPINE1	7056, 5340, 432, 2152, 7980, 7035, 4035, 2191, 2153, 2157, 5054
PIROXICAM	C0031990	0.000993092	n/a	11	3.73824	53	HSPB1, CAPN9, CDKN1A, KNG1, MMP2, CR1, ALOX5, FPR2, ITGAM, IL1RN, CFP	3315, 10753, 1026, 3827, 4313, 1378, 240, 2358, 3684, 3557, 5199
AMD 3100	C0662900	0.00136986	n/a	11	3.8793	55	ZBTB16, CSF3, CMKLR1, CCR2, MMP13, CX3CR1, GPR15, CD4, PAX4, CCR1, CD74	7704, 1440, 1240, 729230, 4322, 1524, 2838, 920, 5078, 1230, 972
OK 432	C0918027	0.00136986	n/a	11	3.8793	55	LY96, TLR3, CD80, TYMP, ITGAM, B3GAT1, CD4, TNF, UMOD, CD86, CD1A	23643, 7098, 941, 1890, 3684, 27087, 920, 7124, 7369, 942, 909
RECOMBINANT INTERLEUKIN 4	C1522540	0.0015981	n/a	11	3.94984	56	CSF3, CD80, CD19, TNFSF13B, BLNK, B3GAT1, CD4, TNF, CD86, CD14, CD1A	1440, 941, 930, 10673, 29760, 27087, 920, 7124, 942, 929, 909
HYPOLIPIDEMIC AGENTS	C0086440	0.00214914	n/a	11	4.0909	58	FABP1, LDLR, GPBAR1, VLDLR, PANK1, NPC1L1, UCP2, PPARD, PLTP, CETP, ISG15	2168, 3949, 151306, 7436, 53354, 29881, 7351, 5467, 5360, 1071, 9636
CERIVASTATIN	C0528023	0.00214914	n/a	11	4.0909	58	ENTPD1, ITGAL, LDLR, CCR2, TNNI2, CYBA, CD36, ALB, RXRA, TNF, CYP2C8	953, 3683, 3949, 729230, 7136, 1535, 948, 213, 6256, 7124, 1558
CURDLAN	C0056608	0.00214914	n/a	11	4.0909	58	CCL17, NOD2, TLR3, CLEC4E, CD80, CLEC7A, CLEC4D, CD4, TNF, CD86, GRN	6361, 64127, 7098, 26253, 941, 64581, 338339, 920, 7124, 942, 2896
4 BETA AMINOETHYLBENZOLSULFOFLUORIDE	C0047895	0.00284387	n/a	11	4.23197	60	PLG, TIMP1, NCF2, LDLR, CCR2, CYBA, PRTN3, CYBB, TNF, STATH, CCR1	5340, 7076, 4688, 3949, 729230, 1535, 5657, 1536, 7124, 6779, 1230
THROMBIN INHIBITORS	C2746042	0.0032534	n/a	11	4.3025	61	C5AR1, THBD, PLG, CR1, F3, TFPI, GP1BA, F5, SERPINA1, SERPINE1, SERPIND1	728, 7056, 5340, 1378, 2152, 7035, 2811, 2153, 5265, 5054, 3053
LIPASE	C0023764	0.0032534	n/a	11	4.3025	61	DGAT2, LDLR, VLDLR, LIPA, NPC1L1, MOGAT1, CD36, LIPC, PLTP, CES1, CETP	84649, 3949, 7436, 3988, 29881, 116255, 948, 3990, 5360, 1066, 1071
7 AMINOACTINOMYCIN D	C0049832	0.0032534	n/a	11	4.3025	61	ITGAL, CR2, CD19, CTSH, ENO2, CD93, ITGAM, B3GAT1, CD4, CD86, CD14	3683, 1380, 930, 1512, 2026, 22918, 3684, 27087, 920, 942, 929
LEVAMISOLE	C0023556	0.00421396	n/a	11	4.44357	63	CSF2RA, ENTPD1, ITGAL, PRTN3, TLR5, EPHX1, HLA-DPB1, NT5E, CD4, TNF, EPOR	1438, 953, 3683, 5657, 7100, 2052, 3115, 4907, 920, 7124, 2057
ITRACONAZOLE	C0064113	0.00421396	n/a	11	4.44357	63	CSF3, ABCA2, ABCG2, EPHX1, ALB, SCGB1A1, CYP2C8, MS4A2, CYP51A1, CD101, SMO	1440, 20, 9429, 2052, 213, 7356, 1558, 2206, 1595, 9398, 6608
BEXAROTENE	C0765273	0.00477223	n/a	11	4.5141	64	CCL17, CCR4, NPC1L1, LRP1, CCND1, RXRA, DHRS3, PPARD, TREM2, CETP, ISG15	6361, 1233, 29881, 4035, 595, 6256, 9249, 5467, 54209, 1071, 9636
DESOXYCORTICOSTERONE ACETATE	C0813203	0.00477223	n/a	11	4.5141	64	SLC26A4, ACE2, MMP2, NPPA, KL, CCR2, CYBA, CX3CR1, CYBB, CXCL16, EGR1	5172, 59272, 4313, 4878, 9365, 729230, 1535, 1524, 1536, 58191, 1958
PRISTANE	C0071986	0.00680468	n/a	11	4.7257	67	TLR3, LGALS3, MYCN, TLR7, FCER1G, FCAR, BLNK, CD4, SLC11A1, TNF, CD1D	7098, 3958, 4613, 51284, 2207, 2204, 29760, 920, 6556, 7124, 912
VANILLOID	C1519952	0.00849759	n/a	11	4.86676	69	CCR4, POU4F1, KNG1, ASZ1, FAAH, OSM, PNOC, TRPM8, GPR18, CALCB, GALR2	1233, 5457, 3827, 136991, 2166, 5008, 5368, 79054, 2841, 797, 8811
MEDICATED	C3812869	0.00945777	n/a	11	4.9373	70	TSPO, ACE2, GPSM1, VLDLR, GPX3, NPC1L1, S100B, DLGAP1, FAS-AS1, SCGB2A1, IL1RN	706, 59272, 26086, 7436, 2878, 29881, 6285, 9229, 100302740, 4246, 3557
ACETYLMURAMYL ALANYL ISOGLUTAMINE	C0001060	0.00945777	n/a	11	4.9373	70	NOD2, CD80, DUOX2, TLR5, SH2B3, NCF4, TNF, CD86, FAS-AS1, IL1RN, CD14	64127, 941, 50506, 7100, 10019, 4689, 7124, 942, 100302740, 3557, 929
MURAMIDASE	C0026794	3.57063e-06	n/a	10	1.76332	25	CR2, ENO2, CD68, PDPN, S100A9, LILRB3, F8, SERPINA1, S100A8, CD1A	1380, 2026, 968, 10630, 6280, 11025, 2157, 5265, 6279, 909
CONJUGATE VACCINE	C0206515	0.00017484	n/a	10	2.60971	37	CSF2RA, DNAJC15, EPYC, TLR7, TNFSF13B, CLEC7A, TLR5, ALB, BLNK, CD4	1438, 29103, 1833, 51284, 10673, 64581, 7100, 213, 29760, 920
PURINERGIC P1 RECEPTOR AGONISTS	C2917322	0.000222435	n/a	10	2.68025	38	C5AR1, HSPB1, AGXT, ENTPD1, ADORA3, NPPA, DNTT, ITGAM, TNF, CD14	728, 3315, 189, 953, 140, 4878, 1791, 3684, 7124, 929
PHOSPHORAMIDON	C0070915	0.000654095	n/a	10	3.03291	43	ACE2, SSTR4, DSC2, KNG1, NPPA, PNOC, MMEL1, CALCB, EDNRA, CFP	59272, 6754, 1824, 3827, 4878, 5368, 79258, 797, 1909, 5199
FIBRIN TISSUE ADHESIVE	C0016004	0.000793774	n/a	10	3.10344	44	PLG, CDH5, KIT, XPNPEP2, ARTN, F5, ALB, TNFAIP6, F8, PECAM1	5340, 1003, 3815, 7512, 9048, 2153, 213, 7130, 2157, 5175
ABATACEPT	C1619966	0.00136633	n/a	10	3.31504	47	CD80, TNFSF13B, FCGRT, CD1C, BLNK, CD4, TNF, CD86, STEAP4, IL1RN	941, 10673, 2217, 911, 29760, 920, 7124, 942, 79689, 3557
THIOPENTAL	C0039925	0.00190759	n/a	10	3.45611	49	CR2, KNG1, MMP2, FAAH, TLX2, SEMA3G, ITGAM, ALB, S100B, KCNJ11	1380, 3827, 4313, 2166, 3196, 56920, 3684, 213, 6285, 3767
COMPOUND 48 80	C0009574	0.00190759	n/a	10	3.45611	49	C5AR1, PRG2, KNG1, ADORA3, CPA3, EPX, RNASE2, ANGPT1, FPR2, ALB	728, 5553, 3827, 140, 1359, 8288, 6036, 284, 2358, 213
RECOMBINANT GRANULOCYTE COLONY STIMULATING FACTOR	C0376562	0.00223664	n/a	10	3.52664	50	CSF3, ITGAL, CD19, CD33, ITGAM, CD4, CEBPE, CCR6, IL1RN, CD14	1440, 3683, 930, 945, 3684, 920, 1053, 1235, 3557, 929
HUMAN IMMUNOGLOBULIN G	C2702333	0.00260976	n/a	10	3.59717	51	LY96, PLG, LGALS3, EPYC, FCGRT, FCGR2A, ALB, BLNK, CD4, PDGFRA	23643, 5340, 3958, 1833, 2217, 2212, 213, 29760, 920, 5156
INTERFERON TYPE II	C0021745	0.00350478	n/a	10	3.73824	53	CCL17, MX1, TLR8, CXCL9, TNF, IFIT1, CD1D, ISG15, PRLR, SAMHD1	6361, 4599, 51311, 4283, 7124, 3434, 912, 9636, 5618, 25939
CHONDROITIN 6 SULFATE	C0086009	0.00403783	n/a	10	3.80877	54	MAG, CHST15, PLG, TIMP1, SERPINF1, NCAN, EPYC, CHST12, RBP3, KIAA0319	4099, 51363, 5340, 7076, 5176, 1463, 1833, 55501, 5949, 9856
ACYCLOVIR	C0001367	0.0046305	n/a	10	3.8793	55	CSF3, CR2, TDO2, ALDH2, DNTT, ABCG2, PNP, CDH17, BLNK, CD4	1440, 1380, 6999, 217, 1791, 9429, 4860, 1015, 29760, 920
ATENOLOL	C0004147	0.0046305	n/a	10	3.8793	55	C5AR1, ACE2, KNG1, NAGA, NPPA, VNN1, ACY3, SEMA3G, ANXA6, ALB	728, 59272, 3827, 4668, 4878, 8876, 91703, 56920, 309, 213
EGG LYSOZYME	C4040986	0.0068257	n/a	10	4.0909	58	LY96, CR2, CD80, CD19, IRF8, IFI30, GGT5, CD4, EPOR, RBP3	23643, 1380, 941, 930, 3394, 10437, 2687, 920, 2057, 5949
CLOTRIMAZOLE	C0009074	0.00771301	n/a	10	4.16143	59	KCNA5, CYP46A1, KNG1, CA3, TRPM8, GPR183, EPHX1, CYP2C8, CYP51A1, NR1I2	3741, 10858, 3827, 761, 79054, 1880, 2052, 1558, 1595, 8856
CYTOTOXIC AGENT	C0304497	0.00975161	n/a	10	4.3025	61	HTATIP2, EPAS1, MYCN, TYMP, ABCG2, PRAME, CD33, MSLN, SERPINH1, NUTM1	10553, 2034, 4613, 1890, 9429, 23532, 945, 10232, 871, 256646
SODIUM HYALURONATE	C0087000	2.06504e-05	n/a	9	1.69279	24	CDH2, PLG, TIMP1, ALB, TNF, SERPINE1, EPOR, GCH1, IL1RN	1000, 5340, 7076, 213, 7124, 5054, 2057, 2643, 3557
HUMAN THROMBIN	C2369149	0.000265119	n/a	9	2.25705	32	THBD, PLG, SERPINB8, CCR2, F3, TFPI2, TFPI, F5, SERPINA1	7056, 5340, 5271, 729230, 2152, 7980, 7035, 2153, 5265
ANTI ASTHMATIC AGENTS	C0282556	0.000341948	n/a	9	2.32758	33	ADORA3, EPX, ALOX5, TLR7, TNFSF13B, RNASE3, CYP2C8, MS4A2, PDE4A	140, 8288, 240, 51284, 10673, 6037, 1558, 2206, 5141
COAGULATION PROTEIN	C1292266	0.000436247	n/a	9	2.39812	34	THBD, PLG, KNG1, F3, TFPI, LRP1, F5, F8, SERPINE1	7056, 5340, 3827, 2152, 7035, 4035, 2153, 2157, 5054
OLOPATADINE	C0527189	0.000550909	n/a	9	2.46865	35	CCL17, ITGAL, UCN, KNG1, RNASE2, S100A1, S100B, TNF, HRH1	6361, 3683, 7349, 3827, 6036, 6271, 6285, 7124, 3269
VITAMIN K 1	C0031862	0.000689112	n/a	9	2.53918	36	PTPRJ, FAAH, CDO1, F3, LRP1, CD36, EPHX1, CYP4F2, ABCC6	5795, 2166, 1036, 2152, 4035, 948, 2052, 8529, 368
CEFOTAXIME	C0007554	0.000689112	n/a	9	2.53918	36	LILRA2, CR1, GNS, F5, LILRB4, ALB, LILRB1, NPL, CD14	11027, 1378, 2799, 2153, 11006, 213, 10859, 80896, 929
IMMUNOL	C1517844	0.000689112	n/a	9	2.53918	36	ENTPD1, C2, CD80, ITGAM, FBXL2, CD4, TNF, UMOD, CD86	953, 717, 941, 3684, 25827, 920, 7124, 7369, 942
PHENOXYBENZAMINE	C0031441	0.00128234	n/a	9	2.75078	39	QRFPR, UCN, HCRTR2, NPPA, SLC22A2, VIPR2, DBH, CES1, MARCO	84109, 7349, 3062, 4878, 6582, 7434, 1621, 1066, 8685
FIBRINOGEN HUMAN PLASMA DERIVED	C2587184	0.00155275	n/a	9	2.82131	40	PLG, ITGAV, PADI2, GPM6B, ENO2, EPHX1, PADI4, ALB, F8	5340, 3685, 11240, 2824, 2026, 2052, 23569, 213, 2157
MILTEFOSINE	C0068006	0.00155275	n/a	9	2.82131	40	MX1, DNTT, ABCG2, ABCA3, CD4, TNF, CD86, CYP51A1, CD14	4599, 1791, 9429, 21, 920, 7124, 942, 1595, 929
ANTIFIBRINOLYTIC AGENTS	C0003304	0.00186706	n/a	9	2.89184	41	THBD, PLG, TFPI2, TFPI, SERPINB2, F5, NT5E, F8, SERPINE1	7056, 5340, 7980, 7035, 5055, 2153, 4907, 2157, 5054
CASTANOSPERMINE	C0054849	0.00223019	n/a	9	2.96238	42	LY96, ENTPD1, ITGAL, LDLR, LIPC, CD1B, CD1D, B3GALT4, PECAM1	23643, 953, 3683, 3949, 3990, 910, 912, 8705, 5175
KAOLIN	C0022499	0.00223019	n/a	9	2.96238	42	GALR1, PLG, KNG1, F3, PNOC, GP1BA, S100A9, F8, GALR2	2587, 5340, 3827, 2152, 5368, 2811, 6280, 2157, 8811
ALTEPLASE	C0032143	0.00366529	n/a	9	3.17398	45	PLG, MMP2, VLDLR, F3, TFPI2, SERPINB2, LRP1, S100B, SERPINE1	5340, 4313, 7436, 2152, 7980, 5055, 4035, 6285, 5054
ELASTASE INHIBITOR	C0596481	0.00427766	n/a	9	3.24451	46	THBD, PLG, SERPINB8, SERPINB9, PRTN3, ITGAM, SERPINA1, CSTA, IL1RN	7056, 5340, 5271, 5272, 5657, 3684, 5265, 1475, 3557
ETOMIDATE	C0015131	0.00496689	n/a	9	3.31504	47	ANO1, KNG1, FAAH, SEMA3G, ALB, HTR3A, HSD17B3, CD14, CYP11A1	55107, 3827, 2166, 56920, 213, 3359, 3293, 929, 1583
SEPRANOLONE	C0376202	0.00660083	n/a	9	3.45611	49	HMBOX1, TSPO, GPBAR1, PGR, DHRS9, UMOD, PCDH19, NR1I2, CYP11A1	79618, 706, 151306, 5241, 10170, 7369, 57526, 8856, 1583
GW9662	C1137010	0.00979415	n/a	9	3.66771	52	PTGDS, SERPINF1, KLF4, RETN, PON2, FPR2, CD36, PPARD, KLF5	5730, 5176, 9314, 56729, 5445, 2358, 948, 5467, 688
ALUMINUM HYDROXIDE	C0002371	0.00979415	n/a	9	3.66771	52	CD80, TLR7, CLEC7A, BACE2, ALB, IL36B, CD4, CD86, CETP	941, 51284, 64581, 25825, 213, 27177, 920, 942, 1071
S 27609	C0381150	8.13655e-06	n/a	8	1.19906	17	TLR3, MX1, TLR7, CD36, TNF, ISG15, IL1RN, CD14	7098, 4599, 51284, 948, 7124, 9636, 3557, 929
ACECLOFENAC	C0050403	2.22665e-05	n/a	8	1.34012	19	ITGAL, TIMP1, ALOX5, ITGAM, TNF, CYP2C8, IL1RN, PECAM1	3683, 7076, 240, 3684, 7124, 1558, 3557, 5175
DEFIBROTIDE	C0057257	3.48186e-05	n/a	8	1.41066	20	THBD, PLG, ITGAV, ITGAL, TFPI, SERPINB2, TNF, SERPINE1	7056, 5340, 3685, 3683, 7035, 5055, 7124, 5054
ARGATROBAN	C0048470	0.000112067	n/a	8	1.62225	23	C5AR1, THBD, DNTT, F3, TFPI, F5, F8, SERPIND1	728, 7056, 1791, 2152, 7035, 2153, 2157, 3053
RECOMBINANT FVIIA	C0534191	0.000517637	n/a	8	1.97492	28	THBD, ASGR1, F3, TFPI, GP1BA, F5, ALB, F8	7056, 432, 2152, 7035, 2811, 2153, 213, 2157
3',5' DICHLOROMETHOTREXATE	C0046764	0.000671088	n/a	8	2.04545	29	CCL17, NOD2, TIMP1, F3, CXXC5, EPHX1, ANXA2, MS4A2	6361, 64127, 7076, 2152, 51523, 2052, 302, 2206
LEPIRUDIN	C0772394	0.000859164	n/a	8	2.11598	30	C5AR1, THBD, PLG, AQP9, CR1, F3, HVCN1, F8	728, 7056, 5340, 366, 1378, 2152, 84329, 2157
PHOSPHOLIPASE A2 INHIBITORS	C3658209	0.00108725	n/a	8	2.18652	31	ROBO1, UCN, KNG1, ALOX5, ANXA6, TNF, SCGB1A1, CES1	6091, 7349, 3827, 240, 309, 7124, 7356, 1066
SERPIN SUPERFAMILY	C0036763	0.00136117	n/a	8	2.25705	32	PLG, SERPINF1, SERPINB2, PRTN3, SERPINA1, SERPINE1, SERPINH1, SERPIND1	5340, 5176, 5055, 5657, 5265, 5054, 871, 3053
REPAGLINIDE	C0246689	0.00136117	n/a	8	2.25705	32	NOS1AP, UCP2, PPARD, SERPINE1, KCNJ11, CYP2C8, PAX4, NR1I2	9722, 7351, 5467, 5054, 3767, 1558, 5078, 8856
PRANLUKAST	C0526058	0.00136117	n/a	8	2.25705	32	ALOX5, CCR2, CD33, RNASE3, ALOX5AP, CYP2C8, CD14, HRH1	240, 729230, 945, 6037, 241, 1558, 929, 3269
FEBUXOSTAT	C0249529	0.00252434	n/a	8	2.46865	35	FABP1, CSF3, CST3, PNP, ALB, S100B, CYP2C8, HAVCR1	2168, 1440, 1471, 4860, 213, 6285, 1558, 26762
RECOMBINANT INTERFERON BETA 1A	C0982234	0.00252434	n/a	8	2.46865	35	CDA, MX1, CSF3, ITGAL, IL23R, CD1C, S100B, CD4	978, 4599, 1440, 3683, 149233, 911, 6285, 920
ANGIOTENSIN II TYPE 1 RECEPTOR BLOCKERS	C1449680	0.00252434	n/a	8	2.46865	35	SMAD1, ACE2, KNG1, DNTT, CYBA, NPC1L1, DLL4, TNFRSF11A	4086, 59272, 3827, 1791, 1535, 29881, 54567, 8792
MINERALOCORTICOID RECEPTOR ANTAGONISTS	C1579268	0.00304849	n/a	8	2.53918	36	ACE2, LGALS3, KL, PGR, CYBA, VIPR2, CD68, GPER1	59272, 3958, 9365, 5241, 1535, 7434, 968, 2852
HLA DR BETA AG	C0019765	0.00304849	n/a	8	2.53918	36	CD33, FCGR2A, HLA-DPB1, S100A9, CD4, IL1RN, MARCH1, MARCO	945, 2212, 3115, 6280, 920, 3557, 55016, 8685
SODIUM DODECYL SULFATE	C0037506	0.0036535	n/a	8	2.60971	37	HSPB1, PLG, GPRC5A, RBP1, S100B, CD86, MS4A2, CD1A	3315, 5340, 9052, 5947, 6285, 942, 2206, 909
LUXOL FAST BLUE MBS	C0065274	0.0036535	n/a	8	2.60971	37	MAG, POU4F1, EPX, DNTT, ENO2, CD68, RNASE3, PECAM1	4099, 5457, 8288, 1791, 2026, 968, 6037, 5175
PLATELET CONCENTRATE	C2362067	0.00513806	n/a	8	2.75078	39	KNG1, ANGPTL6, HLA-DQA1, CD33, GP1BA, F8, TNF, CD14	3827, 83854, 3117, 945, 2811, 2157, 7124, 929
RECOMBINANT INTERFERON GAMMA	C0021740	0.00817617	n/a	8	2.96238	42	PLG, C2, CD93, SLC26A3, TNF, CD1D, CD14, CFP	5340, 717, 22918, 1811, 7124, 912, 929, 5199
CUPRAMMONIUM CELLULOSE	C0056591	0.00943932	n/a	8	3.03291	43	ITGAL, ALOX5, LIPA, ITGAM, ALB, TNF, IL1RN, CD14	3683, 240, 3988, 3684, 213, 7124, 3557, 929
DIPHENHYDRAMINE	C0012522	0.00943932	n/a	8	3.03291	43	HNMT, KNG1, SLC22A2, NPL, UCP2, TNF, ALOX5AP, HRH1	3176, 3827, 6582, 80896, 7351, 7124, 241, 3269
HUMAN IMMUNOGLOBULIN M	C2825348	0.00943932	n/a	8	3.03291	43	MAG, MYCN, BPI, VSIG4, CR1, BLNK, SERPINA1, CFP	4099, 4613, 671, 11326, 1378, 29760, 5265, 5199
TOBRAMYCIN	C0040341	0.00943932	n/a	8	3.03291	43	LY96, CSF3, CST3, RNASE1, SLC41A1, GPX3, RBP4, HAVCR1	23643, 1440, 1471, 6035, 254428, 2878, 5950, 26762
CEFUROXIME	C0007562	5.5171e-05	n/a	7	1.12852	16	CSF3, CST3, AK4, NPL, TNF, IL1RN, CD14	1440, 1471, 205, 80896, 7124, 3557, 929
ANTIDIARRHEALS	C0003292	5.5171e-05	n/a	7	1.12852	16	HNF1B, CSF3, ANO1, FAAH, CXCR2, PNOC, SLC26A3	6928, 1440, 55107, 2166, 3579, 5368, 1811
HEMATOPORPHYRIN	C0018959	0.000135376	n/a	7	1.26959	18	HSPB1, TSPO, NLRP12, MX2, ABCG2, ALB, SERPINH1	3315, 706, 91662, 4600, 9429, 213, 871
9 AMINOCAMPTOTHECIN	C0214192	0.000201321	n/a	7	1.34012	19	CLCN1, CSF3, PLG, CD80, PNOC, ABCG2, ALB	1180, 1440, 5340, 941, 5368, 9429, 213
3 HYDROXYKYNURENINE	C0047472	0.000410351	n/a	7	1.48119	21	AGXT, NLRP12, TDO2, ALDH2, KMO, GRM2, KYNU	189, 91662, 6999, 217, 8564, 2912, 8942
KH 1060	C0167620	0.000410351	n/a	7	1.48119	21	MYCN, CD80, ITGAM, RXRA, CEBPE, TNF, CD86	4613, 941, 3684, 6256, 1053, 7124, 942
CHYMOPAPAIN	C0008736	0.00132266	n/a	7	1.76332	25	MPEG1, ITGAV, ITGAL, KIT, CTSH, PRTN3, CD33	219972, 3685, 3683, 3815, 1512, 5657, 945
SYNTHETIC ANTIGENS	C0039115	0.00215841	n/a	7	1.90439	27	MYCN, BPI, CD80, CD19, CD4, CD86, CD1D	4613, 671, 941, 930, 920, 942, 912
IMMUNOGLOBULIN G	C0020852	0.00215841	n/a	7	1.90439	27	CDH5, RBP4, CD68, F5, ALB, SERPINA1, CD14	1003, 5950, 968, 2153, 213, 5265, 929
KREBS RINGER SOLUTION	C0064411	0.00270509	n/a	7	1.97492	28	GALR1, KNG1, NPPA, ATP1B1, TRPM8, ALB, GALR2	2587, 3827, 4878, 481, 79054, 213, 8811
IRON DEXTRAN COMPLEX	C0022092	0.00335193	n/a	7	2.04545	29	SMAD1, FABP1, EPAS1, KL, CYBB, SLC11A1, PAOX	4086, 2168, 2034, 9365, 1536, 6556, 196743
DISUCCINIMIDYL SUBERATE	C0058479	0.00335193	n/a	7	2.04545	29	DGAT2, ENTPD1, PLG, NPPA, FGF8, IGF1R, EPOR	84649, 953, 5340, 4878, 2253, 3480, 2057
PHOSPHOLIPASE A2 INHIBITOR	C0893636	0.00411011	n/a	7	2.11598	30	ROBO1, UCN, KNG1, ALOX5, ANXA6, TNF, SCGB1A1	6091, 7349, 3827, 240, 309, 7124, 7356
BIRB 796	C1121746	0.0049911	n/a	7	2.18652	31	HSPB1, TLR8, KIT, MMP13, ABCG2, S100A9, TNF	3315, 51311, 3815, 4322, 9429, 6280, 7124
TOLEROGEN	C0076797	0.0049911	n/a	7	2.18652	31	CD80, TNFSF13B, CD4, F8, CD86, SERPIND1, RBP3	941, 10673, 920, 2157, 942, 3053, 5949
TAPI 2	C0389500	0.0060123	n/a	7	2.25705	32	SMAD1, ACE2, TIMP1, GP1BA, CXCL16, TNFAIP6, TNF	4086, 59272, 7076, 2811, 58191, 7130, 7124
BECLOMETHASONE	C0004905	0.0060123	n/a	7	2.25705	32	EPX, RNASE3, WFDC1, CD4, ALOX5AP, MS4A2, IL1RN	8288, 6037, 58189, 920, 241, 2206, 3557
INTERFERON BETA 1A	C0254119	0.00717626	n/a	7	2.32758	33	CDA, MX1, CSF3, IL23R, CD1C, S100B, CD4	978, 4599, 1440, 149233, 911, 6285, 920
PROLACTIN RELEASING HORMONE	C0033374	0.00717626	n/a	7	2.32758	33	QRFPR, NPB, PRLHR, KISS1R, DBH, NPFFR2, PROK2	84109, 256933, 2834, 84634, 1621, 10886, 60675
CASPOFUNGIN	C0537894	0.00849893	n/a	7	2.39812	34	HNMT, CSF3, CLEC7A, ALB, LRG1, CYP51A1, CD101	3176, 1440, 64581, 213, 116844, 1595, 9398
CETRORELIX	C0209366	0.00849893	n/a	7	2.39812	34	CDKN1A, DNTT, GHRHR, FGF8, KISS1R, PLTP, CETP	1026, 1791, 2692, 2253, 84634, 5360, 1071
LINAGLIPTIN	C2746078	0.00999218	n/a	7	2.46865	35	CSF2RA, NCF2, GPBAR1, CYBA, SLC22A2, CYBB, IL1RN	1438, 4688, 151306, 1535, 6582, 1536, 3557
RECOMBINANT INTERLEUKIN 8	C1527432	0.00999218	n/a	7	2.46865	35	SERPINF1, ITGAM, NCF4, TNF, S100A8, TNFSF8, ISG15	5176, 3684, 4689, 7124, 6279, 944, 9636
FREE RETINOL	C3873611	1.98639e-05	n/a	6	0.705328	10	CST3, HSD17B6, RBP4, RBP1, DHRS9, CES1	1471, 8630, 5950, 5947, 10170, 1066
EOSINOPHIL DERIVED NEUROTOXIN	C0059409	0.000135082	n/a	6	0.916926	13	PRG2, EPX, RNASE2, RNASE3, SERPINA1, MS4A2	5553, 8288, 6036, 6037, 5265, 2206
THROMBIN	C0040018	0.000222297	n/a	6	0.987459	14	THBD, PLG, F5, F8, TNF, SERPIND1	7056, 5340, 2153, 2157, 7124, 3053
RP 73401	C0295452	0.00034842	n/a	6	1.05799	15	PRG2, MMP2, EPX, RNASE3, TNF, PDE4A	5553, 4313, 8288, 6037, 7124, 5141
EZN 2208	C2347621	0.00034842	n/a	6	1.05799	15	MX1, CSF3, EPAS1, MMP2, ABCG2, PECAM1	4599, 1440, 2034, 4313, 9429, 5175
SR 11237	C0254507	0.00107513	n/a	6	1.26959	18	GPRC5A, CD36, RBP1, ITGAM, CD86, CD1D	9052, 948, 5947, 3684, 942, 912
METRIZAMIDE	C0025869	0.00147986	n/a	6	1.34012	19	LDLR, CD36, ITGAM, ALB, CD4, CD14	3949, 948, 3684, 213, 920, 929
LACTATED RINGER'S SOLUTION	C0073385	0.00147986	n/a	6	1.34012	19	HYLS1, NPPA, F3, ITGAM, ALB, RCBTB2	219844, 4878, 2152, 3684, 213, 1102
LANTHANUM CARBONATE	C0768119	0.00147986	n/a	6	1.34012	19	HNF1B, THBD, CD80, KL, PNOC, CETP	6928, 7056, 941, 9365, 5368, 1071
SINGLE CHAIN UROKINASE TYPE PLASMINOGEN ACTIVATOR	C0086987	0.00198922	n/a	6	1.41066	20	THBD, PLG, ST14, LRP1, SERPINE1, PECAM1	7056, 5340, 6768, 4035, 5054, 5175
BOVINE THROMBIN	C1337342	0.00198922	n/a	6	1.41066	20	THBD, PLG, F3, F5, F8, SERPIND1	7056, 5340, 2152, 2153, 2157, 3053
IXAZOMIB	C3273711	0.00262064	n/a	6	1.48119	21	CD19, TNFSF13B, BLNK, SLAMF7, NR1I2, TLR10	930, 10673, 29760, 57823, 8856, 81793
ANTITHROMBINS	C0003440	0.00262064	n/a	6	1.48119	21	THBD, PLG, F3, TFPI, F5, SERPIND1	7056, 5340, 2152, 7035, 2153, 3053
SUPLATAST TOSILATE	C0527067	0.00262064	n/a	6	1.48119	21	CCL17, CD80, RNASE3, CD86, CD1A, HRH1	6361, 941, 6037, 942, 909, 3269
BRIVANIB ALANINATE	C1948076	0.00339113	n/a	6	1.55172	22	CDH5, COL4A1, ANGPT1, CD93, CES1, PECAM1	1003, 1282, 284, 22918, 1066, 5175
NORGESTREL	C0028368	0.0043181	n/a	6	1.62225	23	TLR3, CD80, PGR, LIPC, CD86, RBP3	7098, 941, 5241, 3990, 942, 5949
PHENYLALANYL LEUCYL PHENYLALANYL GLUTAMINYL PROLYL GLUTAMINYL ARGINYL PHENYLALANINAMIDE	C0070651	0.00541923	n/a	6	1.69279	24	PRLHR, PNOC, KISS1R, TAC4, NPFFR2, UTS2	2834, 5368, 84634, 255061, 10886, 10911
REACTIVE BLUE 2	C0140012	0.00541923	n/a	6	1.69279	24	P2RY11, P2RY13, CDH2, ENTPD1, P2RY6, ENTPD3	5032, 53829, 1000, 953, 5031, 956
TOUCHDOWN	C0912256	0.00541923	n/a	6	1.69279	24	HLA-DMB, CXCR2, KIR2DL4, FCGRT, HLA-DMA, CD14	3109, 3579, 3805, 2217, 3108, 929
TENIDAP	C0076092	0.00671221	n/a	6	1.76332	25	KCNA5, TIMP1, ALOX5, SLC26A3, CD4, TNF	3741, 7076, 240, 1811, 920, 7124
RIVASTIGMINE	C0649350	0.00671221	n/a	6	1.76332	25	CD80, LIPA, ITGAM, SLC18A3, VGF, CD86	941, 3988, 3684, 6572, 7425, 942
MRS 2179	C0674169	0.00671221	n/a	6	1.76332	25	P2RY13, ENTPD1, P2RY6, GP1BA, CXCL16, ENTPD3	53829, 953, 5031, 2811, 58191, 956
HIV VACCINE	C0086413	0.00821459	n/a	6	1.83385	26	HCP5, TLR8, CCR2, FCGRT, CD4, LGALS3BP	10866, 51311, 729230, 2217, 920, 3959
RESIQUIMOD	C0965594	0.00821459	n/a	6	1.83385	26	TLR3, TLR8, CD80, TLR7, BLNK, TNF	7098, 51311, 941, 51284, 29760, 7124
HYDROETHIDINE	C0063082	0.00994355	n/a	6	1.90439	27	CD59, TLR3, ALDH2, CYBB, TNF, PECAM1	966, 7098, 217, 1536, 7124, 5175
PARECOXIB SODIUM	C0915144	0.00994355	n/a	6	1.90439	27	THBD, CD80, ENO2, ALB, S100B, CETP	7056, 941, 2026, 213, 6285, 1071
HUMAN IMMUNOGLOBULIN PRODUCT	C0358321	0.00994355	n/a	6	1.90439	27	PRTN3, F5, ALB, F8, STATH, IL1RN	5657, 2153, 213, 2157, 6779, 3557
BILE ACID SEQUESTRANTS	C2917337	0.00994355	n/a	6	1.90439	27	LDLR, GPBAR1, XCR1, CYP2C8, CES1, CETP	3949, 151306, 2829, 1558, 1066, 1071
BRIMONIDINE	C0525227	0.00994355	n/a	6	1.90439	27	POU4F1, SERPINF1, ARTN, ALB, ADCY8, PDE4A	5457, 5176, 9048, 213, 114, 5141
RUBITECAN	C0213800	0.00994355	n/a	6	1.90439	27	MX1, THBD, CD80, ABCG2, ALB, CETP	4599, 7056, 941, 9429, 213, 1071
ORAL ANTICOAGULANTS	C0354604	0.00994355	n/a	6	1.90439	27	THBD, CST3, F3, F5, CYP4F2, F8	7056, 1471, 2152, 2153, 8529, 2157
2' FUCOSYLLACTOSE	C0045214	0.000322534	n/a	5	0.705328	10	TLR3, LGALS3, CXCR2, TLR7, CD14	7098, 3958, 3579, 51284, 929
ANTISTASIN	C0052098	0.000556994	n/a	5	0.775861	11	THBD, PLG, TFPI, F5, CFP	7056, 5340, 7035, 2153, 5199
TOLMETIN	C0040377	0.000556994	n/a	5	0.775861	11	CD19, TDO2, ABCG2, ALB, SERPINA1	930, 6999, 9429, 213, 5265
DG172	C3493533	0.000899499	n/a	5	0.846394	12	IRF8, CEBPE, SPIB, PPARD, KLF5	3394, 1053, 6689, 5467, 688
ACID CYSTEINE PROTEINASE INHIBITORS	C0001097	0.000899499	n/a	5	0.846394	12	CR2, CD68, S100A9, CSTA, CD1A	1380, 968, 6280, 1475, 909
BC8	C2987608	0.00137706	n/a	5	0.916926	13	CD59, CD19, CD33, CD4, ADCY8	966, 930, 945, 920, 114
ZINC SALTS	C0351669	0.00137706	n/a	5	0.916926	13	CR2, CD68, CD4, F8, SAMHD1	1380, 968, 920, 2157, 25939
E 7010	C0656781	0.00137706	n/a	5	0.916926	13	THBD, CSF3, PNOC, ALB, CETP	7056, 1440, 5368, 213, 1071
ZARDAVERINE	C0085049	0.00201821	n/a	5	0.987459	14	SLC41A1, RNASE2, RNASE3, TNF, PDE4A	254428, 6036, 6037, 7124, 5141
BIOBRAN	C1527110	0.00201821	n/a	5	0.987459	14	CD80, CD4, CD86, CD14, CD1A	941, 920, 942, 929, 909
PLECONARIL	C0759032	0.00201821	n/a	5	0.987459	14	THBD, CSF3, PNOC, ALB, CETP	7056, 1440, 5368, 213, 1071
DIRECT FACTOR XA INHIBITORS	C3653500	0.00201821	n/a	5	0.987459	14	THBD, F3, TFPI, F5, CES1	7056, 2152, 7035, 2153, 1066
FACTOR VIII	C0015506	0.00201821	n/a	5	0.987459	14	LDLR, LRP1, F5, ALB, F8	3949, 4035, 2153, 213, 2157
TRASYLOL	C0592198	0.00285241	n/a	5	1.05799	15	PLG, KNG1, SERPINB2, F8, SERPINA1	5340, 3827, 5055, 2157, 5265
CUROSURF	C0111318	0.00285241	n/a	5	1.05799	15	CD80, CD36, RNASE3, ALB, CD14	941, 948, 6037, 213, 929
HUMAN INTRAVENOUS IMMUNOGLOBULINS	C3494178	0.00285241	n/a	5	1.05799	15	ITGAL, CCR2, FCGRT, ALB, SIGLEC9	3683, 729230, 2217, 213, 27180
COD LIVER OIL	C0009213	0.00390948	n/a	5	1.12852	16	SERPINB2, ALB, TNF, SERPINE1, CD86	5055, 213, 7124, 5054, 942
CANAKINUMAB	C2718773	0.00390948	n/a	5	1.12852	16	NOD2, CCR2, TNF, S100A8, IL1RN	64127, 729230, 7124, 6279, 3557
S 28463	C0389573	0.00390948	n/a	5	1.12852	16	TLR3, MX1, TLR7, TNF, IL1RN	7098, 4599, 51284, 7124, 3557
INGENOL	C0063537	0.00390948	n/a	5	1.12852	16	KCNA5, PNOC, CD36, CD4, EPOR	3741, 5368, 948, 920, 2057
OKY 046	C0133777	0.00390948	n/a	5	1.12852	16	KNG1, ALOX5, ALB, NCF4, TNF	3827, 240, 213, 4689, 7124
7 NITROBENZ 2 OXA 1,3 DIAZOL 4 YLCHOLESTEROL	C0174000	0.00390948	n/a	5	1.12852	16	TSPO, FABP1, LDLR, NPC1L1, CETP	706, 2168, 3949, 29881, 1071
TRIFLURIDINE	C0040987	0.00390948	n/a	5	1.12852	16	UPP1, THBD, TYMP, ADCY8, NR1I2	7378, 7056, 1890, 114, 8856
COMPSTATIN	C0673968	0.00522656	n/a	5	1.19906	17	C5AR1, LY96, CR1, CD14, CFP	728, 23643, 1378, 929, 5199
ANTI TUMOR NECROSIS FACTOR ALPHA DRUG	C1562242	0.00522656	n/a	5	1.19906	17	LGALS3, CXCR2, FCGRT, TNF, GRN	3958, 3579, 2217, 7124, 2896
PROTHROMBIN COMPLEX	C3541956	0.00522656	n/a	5	1.19906	17	F3, F5, ALB, F8, SERPINE1	2152, 2153, 213, 2157, 5054
POLY ICLC	C0071359	0.00682254	n/a	5	1.26959	18	TLR3, PRG2, CCR2, TLR7, CD86	7098, 5553, 729230, 51284, 942
PITAVASTATIN CALCIUM	C2720023	0.00682254	n/a	5	1.26959	18	THBD, CSF3, CD80, PNOC, CYBB	7056, 1440, 941, 5368, 1536
DIRECT THROMBIN INHIBITORS	C3541936	0.00682254	n/a	5	1.26959	18	THBD, F3, TFPI, F5, F8	7056, 2152, 7035, 2153, 2157
CORD FACTORS	C0010004	0.00682254	n/a	5	1.26959	18	CLEC4E, CLEC4D, TNF, CD14, MARCO	26253, 338339, 7124, 929, 8685
CALCIUM	C0006675	0.00682254	n/a	5	1.26959	18	THBD, TAGLN, F5, S100A9, S100A8	7056, 6876, 2153, 6280, 6279
ACYCLIC RETINOID	C0101406	0.0087301	n/a	5	1.34012	19	CDKN1A, CCND1, ALB, RXRA, KLF5	1026, 595, 213, 6256, 688
RYE GRASS	C4049835	0.0087301	n/a	5	1.34012	19	SLAMF6, AGXT, OSM, CD4, UMOD	114836, 189, 5008, 920, 7369
ZOFENOPRILATE	C0085065	0.0087301	n/a	5	1.34012	19	KNG1, CDH5, TNF, AKR1B1, PECAM1	3827, 1003, 7124, 231, 5175
COAGULATION FACTOR VIIIC	C1307126	0.000114363	n/a	4	0.352664	5	SERPINB2, ALB, F8, SERPINE1	5055, 213, 2157, 5054
CI 1044	C0963191	0.000328628	n/a	4	0.423197	6	KCNN3, MMP2, TNF, PDE4A	3782, 4313, 7124, 5141
VTX 294	C3713619	0.000328628	n/a	4	0.423197	6	TLR8, TLR7, TNF, CD86	51311, 51284, 7124, 942
TISSUE FACTOR PATHWAY INHIBITOR	C0164707	0.000723383	n/a	4	0.49373	7	THBD, PLG, TFPI2, TFPI	7056, 5340, 7980, 7035
HIRULOG 1	C0950817	0.000723383	n/a	4	0.49373	7	PLG, F3, F5, SERPINE1	5340, 2152, 2153, 5054
ZHANKUIC ACID A	C0387325	0.000723383	n/a	4	0.49373	7	LY96, CDKN1A, MMP2, CCND1	23643, 1026, 4313, 595
CROFELEMER	C2744960	0.000723383	n/a	4	0.49373	7	THBD, ANO1, UMOD, CETP	7056, 55107, 7369, 1071
3,3',4',5 TETRACHLOROSALICYLANILIDE	C0046874	0.00136456	n/a	4	0.564262	8	CD80, ABCG2, CD4, CD86	941, 9429, 920, 942
AGNUSIDE	C1122015	0.00136456	n/a	4	0.564262	8	CD80, PGR, CD4, CD86	941, 5241, 920, 942
ALOSETRON HYDROCHLORIDE	C0291771	0.00136456	n/a	4	0.564262	8	THBD, CSF3, ALB, CETP	7056, 1440, 213, 1071
DESIRUDIN	C0378366	0.00136456	n/a	4	0.564262	8	F3, TFPI, HVCN1, F8	2152, 7035, 84329, 2157
METHYLENE DIPHOSPHONATE	C0066351	0.00136456	n/a	4	0.564262	8	KIT, ENO2, ALB, PECAM1	3815, 2026, 213, 5175
PROXIGERMANIUM	C0081913	0.00232437	n/a	4	0.634795	9	CCR2, ITGAM, CD4, TNF	729230, 3684, 920, 7124
TRIAZOLODIAZEPINE	C0245118	0.00232437	n/a	4	0.634795	9	EPX, PNOC, ABCG2, TNF	8288, 5368, 9429, 7124
TRIAZOLE ANTIFUNGAL	C0360380	0.00232437	n/a	4	0.634795	9	CYP2C8, CYP51A1, NR1I2, SMO	1558, 1595, 8856, 6608
HLA G ANTIGEN	C0082920	0.00232437	n/a	4	0.634795	9	LILRB2, KIR2DL4, LILRB1, CD14	10288, 3805, 10859, 929
SUBCUTANEOUS HEPARIN	C0353681	0.00232437	n/a	4	0.634795	9	F3, TFPI, RNASE3, ALB	2152, 7035, 6037, 213
GINSENOSIDE RB2	C0061271	0.00232437	n/a	4	0.634795	9	PLG, TIMP1, MMP2, ALB	5340, 7076, 4313, 213
ONO 4007	C0254026	0.00365851	n/a	4	0.705328	10	CDKN1A, CD4, TNF, CD14	1026, 920, 7124, 929
DEAE SEPHADEX A 50	C0057215	0.00365851	n/a	4	0.705328	10	PLG, CTSH, ALB, F8	5340, 1512, 213, 2157
BN 50730	C0081833	0.0054299	n/a	4	0.775861	11	TIMP1, KNG1, EGR1, UTS2	7076, 3827, 1958, 10911
MONOCLONAL ANTIBODY LL2	C0281743	0.0054299	n/a	4	0.775861	11	CD59, CR2, KIT, RNASE1	966, 1380, 3815, 6035
PYRILAMINE MALEATE	C0282330	0.0054299	n/a	4	0.775861	11	PRG2, EPX, RNASE2, RNASE3	5553, 8288, 6036, 6037
BETA AMINOETHYLISOTHIURONIUM DIHYDROBROMIDE	C0001716	0.0054299	n/a	4	0.775861	11	CD59, CD19, CR1, B3GAT1	966, 930, 1378, 27087
BAY X 1005	C0656891	0.0054299	n/a	4	0.775861	11	LDLR, ALOX5, ITGAM, ALOX5AP	3949, 240, 3684, 241
BENRALIZUMAB	C2982078	0.0054299	n/a	4	0.775861	11	IL5RA, RNASE2, RNASE3, CCL24	3568, 6036, 6037, 6369
ASPERGILLUS FUMIGATUS EXTRACT	C1445421	0.0054299	n/a	4	0.775861	11	C5AR1, MMP2, GGT5, CD4	728, 4313, 2687, 920
NADROPARIN	C0206232	0.00769335	n/a	4	0.846394	12	MMP2, F3, TFPI, SERPINE1	4313, 2152, 7035, 5054
MCC 555	C0758974	0.00769335	n/a	4	0.846394	12	CDKN1A, KLF4, CCND1, PPARD	1026, 9314, 595, 5467
MZM	C0721501	0.00769335	n/a	4	0.846394	12	CR2, CD19, CD86, MARCO	1380, 930, 942, 8685
TJ 9	C1138012	0.00769335	n/a	4	0.846394	12	CSF3, TIMP1, MMP2, TNF	1440, 7076, 4313, 7124
SC 41930	C0074112	0.00769335	n/a	4	0.846394	12	C5AR1, ALOX5, ITGAM, IL1RN	728, 240, 3684, 3557
THROMBIN ALFA	C2240523	0.00769335	n/a	4	0.846394	12	THBD, GP1BA, F5, SERPIND1	7056, 2811, 2153, 3053
FONTANA MASSON STAIN	C0060631	0.00769335	n/a	4	0.846394	12	S100P, ENO2, CD68, SLC4A3	6286, 2026, 968, 6508
LITHOCHOLATE	C0086564	0.00769335	n/a	4	0.846394	12	FABP1, DHRS9, ALB, ANXA2	2168, 10170, 213, 302
IRDYE 800CW	C3254109	0.00769335	n/a	4	0.846394	12	ITGAV, KIT, NEB, MSLN	3685, 3815, 4703, 10232
E5564	C0912379	0.00769335	n/a	4	0.846394	12	LY96, PNOC, TNF, CETP	23643, 5368, 7124, 1071
Z 100	C0149256	0.00769335	n/a	4	0.846394	12	NOD2, ITGAM, CD4, CYP11A1	64127, 3684, 920, 1583
5' DEOXY 5 FLUOROCYTIDINE	C0963263	0.000349838	n/a	3	0.211598	3	CDA, TYMP, CES1	978, 1890, 1066
NSC 640488	C0165764	0.000349838	n/a	3	0.211598	3	THBD, TNF, CETP	7056, 7124, 1071
HOMATROPINE	C0062922	0.000349838	n/a	3	0.211598	3	LGALS3, PNOC, CES1	3958, 5368, 1066
EPOXICONAZOLE	C0668753	0.00130095	n/a	3	0.282131	4	HIVEP3, EPX, FAS-AS1	59269, 8288, 100302740
5 CHLORO 2 METHYL 4 ISOTHIAZOLIN 3 ONE	C0049104	0.00130095	n/a	3	0.282131	4	CD80, TNF, CD86	941, 7124, 942
RS 504393	C3657798	0.00130095	n/a	3	0.282131	4	CXCR2, CCR2, CCR1	3579, 729230, 1230
DIPHTHERIA TETANUS ACELLULAR PERTUSSIS VACCINES	C0535644	0.00130095	n/a	3	0.282131	4	TLR7, CD4, TNF	51284, 920, 7124
L 652731	C0124915	0.00130095	n/a	3	0.282131	4	ALOX5, ALB, TNF	240, 213, 7124
INOSINIC ACID	C0021544	0.00313801	n/a	3	0.352664	5	LDLR, CD36, PNP	3949, 948, 4860
ALPIDEM	C0051484	0.00313801	n/a	3	0.352664	5	TSPO, ALB, HTR3A	706, 213, 3359
MONOCLONAL ANTIBODY HEFI 1	C0796480	0.00313801	n/a	3	0.352664	5	LGALS3, FCER1G, TNFSF8	3958, 2207, 944
BOVINE SEMINAL RIBONUCLEASE	C0106964	0.00313801	n/a	3	0.352664	5	RNASE1, RNASE3, RNH1	6035, 6037, 6050
F 4614	C0384949	0.00313801	n/a	3	0.352664	5	CD80, CD4, TNF	941, 920, 7124
LEUKADHERIN 1	C3851799	0.00313801	n/a	3	0.352664	5	TLR7, ITGAM, TNF	51284, 3684, 7124
HAES STERIL	C0591584	0.00313801	n/a	3	0.352664	5	F3, ALB, F8	2152, 213, 2157
ROXIFIBAN ACETATE	C3501644	0.00313801	n/a	3	0.352664	5	THBD, PNOC, CETP	7056, 5368, 1071
MENINGITIS VACCINE	C0361275	0.00313801	n/a	3	0.352664	5	PNOC, ALB, CD4	5368, 213, 920
RINTATOLIMOD	C1434913	0.00313801	n/a	3	0.352664	5	TLR3, THBD, CETP	7098, 7056, 1071
AMPHOTERICIN B DEOXYCHOLATE	C0051761	0.00313801	n/a	3	0.352664	5	HNMT, CSF3, TNF	3176, 1440, 7124
EXAMETAZIME	C0175035	0.00313801	n/a	3	0.352664	5	KIT, ITGAM, ALB	3815, 3684, 213
FOSCAN	C0701505	0.00313801	n/a	3	0.352664	5	ALB, HPR, TNF	213, 3250, 7124
MOEXIPRILAT	C0209137	0.00594096	n/a	3	0.423197	6	KNG1, IGF1R, EGR1	3827, 3480, 1958
GS 9620	C3658665	0.00594096	n/a	3	0.423197	6	MX1, TLR7, ISG15	4599, 51284, 9636
PHLOGENZYM	C0769132	0.00594096	n/a	3	0.423197	6	ITGAL, CD80, CD4	3683, 941, 920
BENZYLOXYCARBONYLPHENYLALANYLPHENYLALANINE DIAZOMETHYL KETONE	C0053319	0.00594096	n/a	3	0.423197	6	CST3, CTSS, CTSH	1471, 1520, 1512
TIAPROFENIC ACID	C0076653	0.00594096	n/a	3	0.423197	6	SERPINB2, ALB, SERPINE1	5055, 213, 5054
GI 129471	C0257713	0.00594096	n/a	3	0.423197	6	MMP2, TNF, IL1RN	4313, 7124, 3557
CITRATE PHOSPHATE DEXTROSE	C0055816	0.00594096	n/a	3	0.423197	6	CR1, ALB, F8	1378, 213, 2157
WORMWOOD EXTRACT	C1095890	0.00594096	n/a	3	0.423197	6	KIT, HLA-DQA1, TNF	3815, 3117, 7124
BRL 50481	C1566895	0.00594096	n/a	3	0.423197	6	PDE7B, TNF, PDE4A	27115, 7124, 5141
ARP 100	C3714018	0.00594096	n/a	3	0.423197	6	ITGAV, MMP2, OSM	3685, 4313, 5008
BL1521	C1528435	0.00594096	n/a	3	0.423197	6	CDKN1A, MYCN, CCND1	1026, 4613, 595
3 HYDROXYPYRIDIN 4 ONE	C0908483	0.00594096	n/a	3	0.423197	6	ALOX5, HOXC6, CYP51A1	240, 3223, 1595
HAEMACCEL	C0918273	0.00594096	n/a	3	0.423197	6	NPPA, ALB, VGF	4878, 213, 7425
TECHNETIUM TC 99M PENTETATE	C0080212	0.00594096	n/a	3	0.423197	6	CST3, PTGDS, ALB	1471, 5730, 213
ST 1571	C1097576	0.00594096	n/a	3	0.423197	6	KIT, PDGFRA, TFR2	3815, 5156, 7036
1 FURAN 2 YL 3 PYRIDIN 2 YL PROPENONE	C1700549	0.00594096	n/a	3	0.423197	6	MMP2, ALOX5, TNF	4313, 240, 7124
2 AZETIDINONE	C0761491	0.00986983	n/a	3	0.49373	7	FAAH, NPC1L1, ANXA2	2166, 29881, 302
BEMIPARIN	C0916062	0.00986983	n/a	3	0.49373	7	EPX, TFPI, SERPINE1	8288, 7035, 5054
B 428	C0754251	0.00986983	n/a	3	0.49373	7	PLG, TIMP1, SERPINB2	5340, 7076, 5055
KD IX 73 4	C0388970	0.00986983	n/a	3	0.49373	7	KNG1, CD4, TNF	3827, 920, 7124
ALVEOFACT	C0210638	0.00986983	n/a	3	0.49373	7	PLG, ALB, TNF	5340, 213, 7124
POLYSORBATES	C0032602	0.00986983	n/a	3	0.49373	7	CSF3, WFDC1, IL1RN	1440, 58189, 3557
CAELYX	C0701183	0.00986983	n/a	3	0.49373	7	CDKN1A, ABCG2, TNF	1026, 9429, 7124
MUR NAC L ALA D ISOGLN	C0086659	0.00986983	n/a	3	0.49373	7	NOD2, TNF, CD14	64127, 7124, 929
SYNTHETIC COPOLYMER	C1268899	0.00986983	n/a	3	0.49373	7	GALM, KIT, SLC26A3	130589, 3815, 1811
ACTARIT	C0378042	0.00986983	n/a	3	0.49373	7	CD4, TNF, CD14	920, 7124, 929
TORBAFYLLINE	C0076835	0.00986983	n/a	3	0.49373	7	CASQ1, TNF, PDE4A	844, 7124, 5141
GROWTH HORMONE RECEPTOR ANTAGONIST	C1947982	0.00986983	n/a	3	0.49373	7	ALB, IGF1R, PRLR	213, 3480, 5618
CRISAMICIN A	C0056490	0.00986983	n/a	3	0.49373	7	CR2, CD1C, SIGLEC9	1380, 911, 27180
SINGLET	C0723338	0.00986983	n/a	3	0.49373	7	SERPINB9, NEB, KIF17	5272, 4703, 57576
HIF 2ALPHA INHIBITOR PT2385	C3896783	0.00986983	n/a	3	0.49373	7	EPAS1, CCND1, SERPINE1	2034, 595, 5054
PKSI 527	C0084061	0.00986983	n/a	3	0.49373	7	PLG, KNG1, F3	5340, 3827, 2152
S 2238	C0073756	0.00986983	n/a	3	0.49373	7	PLG, F3, F8	5340, 2152, 2157
LANOTEPLASE	C0753753	0.00986983	n/a	3	0.49373	7	CSF3, LRP1, SERPINA1	1440, 4035, 5265
ANTIPROTOZOAL AGENTS	C0003416	0.00986983	n/a	3	0.49373	7	S100B, TNF, CYP51A1	6285, 7124, 1595
ZINQUIN	C0249733	0.00986983	n/a	3	0.49373	7	SLC30A2, MMP2, SLC30A1	7780, 4313, 7779
SPIRADOLINE	C0143266	0.00986983	n/a	3	0.49373	7	NPPA, SPINT2, EGR1	4878, 10653, 1958
HEXTEND	C1170317	0.00986983	n/a	3	0.49373	7	ITGAM, ALB, TNF	3684, 213, 7124
AN3485	C3661155	0.00986983	n/a	3	0.49373	7	TLR3, TLR5, TNF	7098, 7100, 7124
PEG PLGA	C3849743	0.00986983	n/a	3	0.49373	7	UCN, CD19, ALB	7349, 930, 213
AN6414	C3661233	0.00496989	n/a	2	0.141066	2	TNF, PDE4A	7124, 5141
JZP 430	C4079896	0.00496989	n/a	2	0.141066	2	FAAH, LIPA	2166, 3988
DIPHTHERIA ANTITOXIN	C0012547	0.00496989	n/a	2	0.141066	2	TGFBI, ALB	7045, 213
SUCCINYLALBUMIN	C0075459	0.00496989	n/a	2	0.141066	2	KIT, ALB	3815, 213
OCTOCOG ALFA	C1691209	0.00496989	n/a	2	0.141066	2	ALB, F8	213, 2157
CORBRIN	C0390439	0.00496989	n/a	2	0.141066	2	TIMP1, ALB	7076, 213
REACTIVE RED 2	C0387847	0.00496989	n/a	2	0.141066	2	P2RY6, ADARB1	5031, 104
MS 247	C0908719	0.00496989	n/a	2	0.141066	2	CTSH, AKR1B1	1512, 231
BRIMONIDINE TARTRATE TIMOLOL MALEATE DRUG COMBINATION	C4042830	0.00496989	n/a	2	0.141066	2	PLG, ALB	5340, 213
PENTETATE	C1702916	0.00496989	n/a	2	0.141066	2	CST3, ALB	1471, 213
AM 5206	C3177710	0.00496989	n/a	2	0.141066	2	FAAH, ALB	2166, 213
ARACYTIN	C1511628	0.00496989	n/a	2	0.141066	2	CD33, ALB	945, 213
OCTIMIBATE	C0069352	0.00496989	n/a	2	0.141066	2	TNF, CES1	7124, 1066
SY 640	C0385278	0.00496989	n/a	2	0.141066	2	ITGAL, TNF	3683, 7124
ATROPA BELLADONNA	C0301370	0.00496989	n/a	2	0.141066	2	NPB, NPL	256933, 80896
CHO DEUNG SAN	C1566301	0.00496989	n/a	2	0.141066	2	MMP2, TNF	4313, 7124
LY 223982	C0083281	0.00496989	n/a	2	0.141066	2	ALOX5, ALB	240, 213
RU 27987	C0073665	0.00496989	n/a	2	0.141066	2	PGR, HPR	5241, 3250
HUMAN PLASMA PREPARATION	C0304926	0.00496989	n/a	2	0.141066	2	ALB, F8	213, 2157
EUROPEAN OLIVE POLLEN EXTRACT	C2701713	0.00496989	n/a	2	0.141066	2	KIT, CD1D	3815, 912
PENTADECYLAMINE	C3501270	0.00496989	n/a	2	0.141066	2	FAAH, NAAA	2166, 27163
CGS 23885	C0527949	0.00496989	n/a	2	0.141066	2	ALOX5, F3	240, 2152
TETRASTARCH	C1816356	0.00496989	n/a	2	0.141066	2	F3, ALB	2152, 213
BALUGRASTIM	C3871462	0.00496989	n/a	2	0.141066	2	CSF3, ALB	1440, 213
LERISETRON	C0758799	0.00496989	n/a	2	0.141066	2	ALB, HTR3A	213, 3359
MHY407	C3661098	0.00496989	n/a	2	0.141066	2	CDKN1A, CCND1	1026, 595
ZOLPIDEM TARTRATE	C0724725	0.00496989	n/a	2	0.141066	2	PLG, CDKN1A	5340, 1026
CARBOXYCINNAMIC ACID BISHYDROXAMIDE	C0672711	0.00496989	n/a	2	0.141066	2	TNF, SERPINE1	7124, 5054
OPHTHALMIC PREPARATION	C0304650	0.00496989	n/a	2	0.141066	2	FAM46D, TRPM8	169966, 79054
FIRATEGRAST	C2700183	0.00496989	n/a	2	0.141066	2	CD19, CD4	930, 920
CT 1418	C0764328	0.00496989	n/a	2	0.141066	2	TIMP1, TNF	7076, 7124
MDL 27695	C0065806	0.00496989	n/a	2	0.141066	2	CCND1, PAOX	595, 196743
RECOMBINANT HUMAN ALBUMIN HUMAN GRANULOCYTE COLONY STIMULATING FACTOR	C2825833	0.00496989	n/a	2	0.141066	2	CSF3, ALB	1440, 213
1 CYCLOHEXYL 3 DODECYLUREA	C1121212	0.00496989	n/a	2	0.141066	2	EPHX1, CCND1	2052, 595
GALMIC	C1455539	0.00496989	n/a	2	0.141066	2	GALR1, GALR2	2587, 8811
BMS 817399	C3886791	0.00496989	n/a	2	0.141066	2	NR1I2, CCR1	8856, 1230
BMS 457	C3713233	0.00496989	n/a	2	0.141066	2	NR1I2, CCR1	8856, 1230
CDMI	C0045683	0.00496989	n/a	2	0.141066	2	MMP2, TNF	4313, 7124
PROVERA	C0699702	0.00496989	n/a	2	0.141066	2	PGR, SERPINE1	5241, 5054
DEXTRAN T 70	C0011802	0.00496989	n/a	2	0.141066	2	ALB, SCGB2A1	213, 4246
HAEMOPHILUS INFLUENZAE TYPE B POLYSACCHARIDE NEISSERIA MENINGITIDIS OUTER MEMBRANE PROTEIN CONJUGATE VACCINE	C0062085	0.00496989	n/a	2	0.141066	2	ITGAM, BLNK	3684, 29760
LEONURUS CARDIACA EXTRACT	C3486751	0.00496989	n/a	2	0.141066	2	NPB, NPL	256933, 80896
1,2 DIAMINO 4,5 METHYLENEDIOXYBENZENE	C0209062	0.00496989	n/a	2	0.141066	2	F3, UMOD	2152, 7369
ICI 128436	C0123076	0.00496989	n/a	2	0.141066	2	ALB, AKR1B1	213, 231
M NITROBENZOYLALANINE	C0252609	0.00496989	n/a	2	0.141066	2	KMO, KYNU	8564, 8942
LYSOCELLIN	C0065382	0.00496989	n/a	2	0.141066	2	CDKN1A, CCND1	1026, 595
SSR180575	C1136821	0.00496989	n/a	2	0.141066	2	TSPO, TNF	706, 7124

## Sheet: IDH1 MUT TCGA
Table S2 : List of Pharmacological Substances by cohort (related to Figure 1A)
Pharmacological Substances (Genomatix) enriched in IDH1MUT patient (Verhaak)				ATRA-related Gene signature
				VD-related Gene Signature
Pharmacological substance	Pharmacological substance id	P-value	Adjusted p-value	# Genes (observed)	# Genes (expected)	# Genes (total)	List of observed genes	Gene ids
TRETINOIN	C0040845	0.000105067	n/a	15	5.03633	989	CHD7, HOXA4, HOXB6, MEIS1, BTBD11, HOXA9, CFD, CCNA1, HOXA3, PBX3, HOXB2, MYCN, PRICKLE1, FUT4, HOXA5	55636, 3201, 3216, 4211, 121551, 3205, 1675, 8900, 3200, 5090, 3212, 4613, 144165, 2526, 3202
RETINOIDS	C0035339	0.000203638	n/a	13	4.15535	816	CHD7, HOXA4, HOXB6, MEIS1, BTBD11, HOXA9, HOXA3, PBX3, HOXB2, MYCN, PRICKLE1, FUT4, HOXA5	55636, 3201, 3216, 4211, 121551, 3205, 3200, 5090, 3212, 4613, 144165, 2526, 3202
TRICHOSTATIN A	C0077063	0.00326913	n/a	8	2.49016	489	MXD1, MEIS1, STAR, RFX2, HOXA9, CD9, MYCN, RGCC	4084, 4211, 6770, 5990, 3205, 928, 4613, 28984
CYCLOHEXIMIDE	C0010572	0.00301981	n/a	7	1.92491	378	CDK3, STAR, HOXA3, CD9, MYCN, DSC2, SLC9A3	1018, 6770, 3200, 928, 4613, 1824, 6550
CYCLIN DEPENDENT KINASE INHIBITOR AGENTS	C1511576	0.00247318	n/a	6	1.37493	270	DACH1, CDK3, MEIS1, CCNA1, MYCN, RGCC	1602, 1018, 4211, 8900, 4613, 28984
FUCOIDAN	C0060794	0.000463366	n/a	5	0.646728	127	AZU1, MPO, CFD, SELL, FUT4	566, 4353, 1675, 6402, 2526
HYDROCORTISONE	C0020268	0.00158852	n/a	5	0.850422	167	AMY1A, STAR, IRX3, CFD, SELL	276, 6770, 79191, 1675, 6402
VP 16	C0733688	0.00840196	n/a	5	1.25781	247	DACH1, CHD7, MEIS1, HOXA9, MYCN	1602, 55636, 4211, 3205, 4613
BACTERICIDAL PERMEABILITY INCREASING PROTEIN	C0052897	7.82016e-05	n/a	4	0.229156	45	AZU1, MPO, CTSG, GPC4	566, 4353, 1511, 2239
PREGNANT MARE SERUM GONADOTROPINS	C1136247	0.00117707	n/a	4	0.463404	91	STAR, HOXA10, GPC4, EREG	6770, 3206, 2239, 2069
TYRPHOSTIN AG 1478	C0528985	0.00364485	n/a	4	0.631451	124	S100A10, ADAM17, EREG, SLC9A3	6281, 6868, 2069, 6550
BAFILOMYCIN A1	C0052919	0.00419712	n/a	4	0.656913	129	AZU1, CCNA1, CA2, SLC9A3	566, 8900, 760, 6550
ANISOMYCIN	C0003082	0.00618752	n/a	4	0.733298	144	STAR, SKIL, ADAM17, SLC9A3	6770, 6498, 6868, 6550
8 BROMO CYCLIC ADENOSINE MONOPHOSPHATE	C0000661	0.00764071	n/a	4	0.779129	153	STAR, CFD, NFIL3, SLC9A3	6770, 1675, 4783, 6550
CERULETIDE	C0006639	0.00970191	n/a	4	0.835145	164	MPO, SELL, VMP1, CD9	4353, 6402, 81671, 928
RECOMBINANT FIBROBLAST GROWTH FACTOR 2	C1522505	0.000799114	n/a	3	0.183324	36	MEIS1, HOXA9, HOXB3	4211, 3205, 3213
HERCEPTIN	C0338204	0.0014398	n/a	3	0.224063	44	RASGRP3, CHD7, ADAM17	25780, 55636, 6868
TRAUMEEL S	C0968917	0.00174369	n/a	3	0.23934	47	HOXA9, HOXA10, HOXA5	3205, 3206, 3202
IMO	C1517800	0.0026007	n/a	3	0.274987	54	FOSL2, STAR, ATP2B1	2355, 6770, 490
AMPICILLIN	C0002680	0.00479217	n/a	3	0.341187	67	HOXA10, DSC2, SLC9A3	3206, 1824, 6550
AMPICILLINS	C2095775	0.00479217	n/a	3	0.341187	67	HOXA10, DSC2, SLC9A3	3206, 1824, 6550
RICINUS COMMUNIS WHOLE EXTRACT	C3537211	0.00608847	n/a	3	0.371741	73	CA2, CD9, FUT4	760, 928, 2526
DYNE VETERINARY DRUG	C0308914	0.00839257	n/a	3	0.417572	82	SELL, CA2, CD9	6402, 760, 928
MINERALOCORTICOIDS	C0026160	0.00925959	n/a	3	0.432849	85	STAR, ATP2B1, NFIL3	6770, 490, 4783
NITRIC OXIDE SYNTHASE INHIBITOR	C1373060	0.00955981	n/a	3	0.437942	86	MPO, DPYSL3, DSC2	4353, 1809, 1824
LEX 032	C0381874	0.000378173	n/a	2	0.0305541	6	MPO, CTSG	4353, 1511
DIFID	C3490744	0.000701261	n/a	2	0.0407388	8	JAG1, CCNA1	182, 8900
ARJUNOLIC ACID	C0638629	0.000898636	n/a	2	0.0458311	9	MPO, CA2	4353, 760
FACTOR XIIA INHIBITOR	C0208681	0.00111957	n/a	2	0.0509235	10	MPO, CTSG	4353, 1511
MILATUZUMAB	C2716103	0.00136383	n/a	2	0.0560158	11	SELL, CD9	6402, 928
TACALCITOL	C0953467	0.00223469	n/a	2	0.0712928	14	MPO, SELL	4353, 6402
BACTERICIDE	C0004635	0.00257003	n/a	2	0.0763852	15	MPO, CTSG	4353, 1511
HUMAN NEUTROPHIL PEPTIDE 1	C0122620	0.003307	n/a	2	0.0865699	17	AZU1, CTSG	566, 1511
TEZOSENTAN	C0907956	0.003307	n/a	2	0.0865699	17	AZU1, MPO	566, 4353
BB 3103	C0666068	0.00370818	n/a	2	0.0916622	18	SELL, ADAM17	6402, 6868
DEFIBROTIDE	C0057257	0.00457481	n/a	2	0.101847	20	MPO, CTSG	4353, 1511
TENOXICAM	C0076096	0.00503981	n/a	2	0.106939	21	MPO, CA2	4353, 760
SIVELESTAT	C0130137	0.00552565	n/a	2	0.112032	22	MPO, CTSG	4353, 1511
HUMAN NEUTROPHIL PEPTIDE 2	C0122159	0.00552565	n/a	2	0.112032	22	AZU1, CTSG	566, 1511
AZILSARTAN	C1958569	0.00655894	n/a	2	0.122216	24	CFD, SLC9A3	1675, 6550
ADRENERGIC AGENTS	C0001637	0.00710596	n/a	2	0.127309	25	STAR, CFD	6770, 1675
CHYMOPAPAIN	C0008736	0.00710596	n/a	2	0.127309	25	CTSG, SELL	1511, 6402
BET BROMODOMAINS 2/3/4 INHIBITOR OTX015	C3641185	0.0082597	n/a	2	0.137493	27	MYCN, HOXA5	4613, 3202
PIRARUBICIN	C0071126	0.008866	n/a	2	0.142586	28	MIR21, MYCN	406991, 4613
STRONTIUM RANELATE	C0936139	0.008866	n/a	2	0.142586	28	CA2, ADAM17	760, 6868
WEB 2086	C0078460	0.00949163	n/a	2	0.147678	29	MPO, SELL	4353, 6402
MESNA	C0000294	0.00949163	n/a	2	0.147678	29	MPO, SLC9A3	4353, 6550

## Sheet: Venn Diagram
Table S2 : List of Pharmacological Substances from Venn diagram(related to Figure 1A)
441 elements included exclusively in "HL60 R132H":	65 common elements in "HL60 R132H" and "IDH1mut TCGA":	3 common elements in "HL60 R132H", "IDH1mut TCGA" and "IDH1mut Verhaak":	9 common elements in "HL60 R132H" and "IDH1mut Verhaak":	2 common elements in "HL60 R132H", "HL60 WT" and "IDH1mut Verhaak":	34 common elements in "HL60 R132H", "HL60 WT" and "IDH1mut TCGA":	74 common elements in "HL60 R132H" and "HL60 WT":	125 elements included exclusively in "HL60 WT":	20 common elements in "HL60 WT" and "IDH1mut TCGA":	3 common elements in "HL60 WT" and "IDH1mut Verhaak":	25 elements included exclusively in "IDH1mut Verhaak":	314 elements included exclusively in "IDH1mut TCGA":	4 common elements in "HL60 R132H", "HL60 WT", "IDH1mut TCGA" and "IDH1mut Verhaak":
DOXORUBICIN	HEPARIN	BACTERICIDAL PERMEABILITY INCREASING PROTEIN	VP 16	CERULETIDE	IONOMYCIN	DEXAMETHASONE	1,2 DIACYLGLYCEROL	ATORVASTATIN	CYCLOHEXIMIDE	TRICHOSTATIN A	POLYSACCHARIDES	ATRA related
PROGESTERONE	PORCINE HEPARIN	RICINUS COMMUNIS WHOLE EXTRACT	HYDROCORTISONE	WEB 2086	INTERLEUKIN 12	ENDOPEPTIDASES	DIGLYCERIDES	VALSARTAN	BAFILOMYCIN A1	CYCLIN DEPENDENT KINASE INHIBITOR AGENTS	BROMODEOXYURIDINE	FUCOIDAN
SODIUM BUTYRATE	GLYCOSAMINOGLYCANS	DEFIBROTIDE	SIVELESTAT		INTERFERON TYPE I	INDOMETHACIN	LINOLEIC ACID	PLASMINOGEN ACTIVATOR	DYNE VETERINARY DRUG	PREGNANT MARE SERUM GONADOTROPINS	OLEIC ACID	VITAMIN D3 related
BLEOMYCIN	CYTOCHALASINS		BACTERICIDE		RECOMBINANT ALPHA CHEMOKINE	DINOPROSTONE	GANGLIOSIDES	CPG ODN		TYRPHOSTIN AG 1478	DITHIOTHREITOL	CHYMOPAPAIN
CHYMOTRYPSIN	INTERFERON		ADRENERGIC AGENTS		ALLERGEN	SB 203580	U 0126	THERAPEUTIC CORYNEBACTERIUM PARVUM		ANISOMYCIN	VITAMIN A
TYROSINE	INTERFERONS		HUMAN NEUTROPHIL PEPTIDE 1		SERPINS	BORTEZOMIB	WY 14,643	OLIGOADENYLATE		8 BROMO CYCLIC ADENOSINE MONOPHOSPHATE	ALL TRANS RETINOL
IBUPROFEN	RECOMBINANT INTERFERON		HUMAN NEUTROPHIL PEPTIDE 2		BUDESONIDE	ARACHIDONATE 5 LIPOXYGENASE INHIBITORS	ARTESUNATE	IRON DEXTRAN COMPLEX		RECOMBINANT FIBROBLAST GROWTH FACTOR 2	ADRENAL CORTEX HORMONES
SODIUM ARSENITE	HUMAN LEUKOCYTE INTERFERON		LEX 032		SERINE PROTEINASE INHIBITORS	PROLINEDITHIOCARBAMATE	FTY 720	HUMAN THROMBIN		HERCEPTIN	HYALURONAN
CYCLOPHOSPHAMIDE	HEPATITIS B SURFACE ANTIGENS		DIFID		PREDNISOLONE	TANSHINONE II A	HEMIN	LINAGLIPTIN		TRAUMEEL S	CHLOROQUINE
ALPHA 1 ANTITRYPSIN	CHONDROITIN SULFATES				ASPIRIN	PROTAMINES	CARNITINE	MEASLES VACCINE		IMO	ACETYL LDL
BAPETA	PROSTAGLANDINS				CYTOCHALASIN B	SODIUM SALICYLATE	MAGNESIUM CATION	ALLERGENIC EXTRACT		AMPICILLIN	HYDROXYMETHYLGLUTARYL COA REDUCTASE INHIBITORS
ALPROSTADIL	APROTININ				RECOMBINANT INTERFERON ALPHA INDUCIBLE PROTEIN 10	PROTEIN KINASE INHIBITORS	DEXTRAN SULFATE SODIUM	RS 504393		AMPICILLINS	VON WILLEBRAND FACTOR
BAICALEIN	TOLONIUM CHLORIDE				BETA GLUCANS	ANTI INFLAMMATORY AGENTS	PHOSPHATASE INHIBITOR	ANTISTASIN		MINERALOCORTICOIDS	SEPTA
CELECOXIB	CARRAGEENAN				RECOMBINANT MACROPHAGE COLONY STIMULATING FACTOR	ADALIMUMAB	AM 580	PYRILAMINE MALEATE		NITRIC OXIDE SYNTHASE INHIBITOR	DEXTRAN SULFATE
ARA C	IMMUNOLOGIC ADJUVANTS				UROKINASE	TELMISARTAN	DIHYDROETHIDIUM	BAY X 1005		ARJUNOLIC ACID	INTRAVENOUS IMMUNOGLOBULIN
PEPTIDOMIMETICS	POLYMYXIN B				GLUCANS	FILGRASTIM	CHENODEOXYCHOLIC ACID	EOSINOPHIL DERIVED NEUROTOXIN		FACTOR XIIA INHIBITOR	ANGIOGENESIS INHIBITORS
DEOXYGLUCOSE	MANNANS				MERBROMIN	NEDOCROMIL SODIUM	TROGLITAZONE	RP 73401		MILATUZUMAB	ENDOGLYCOSIDASES
REBAMIPIDE	BISPECIFIC ANTIBODY				MINOCYCLINE	PYRROLIDINEDITHIOCARBAMATE	KAEMPFEROLS	COD LIVER OIL		TEZOSENTAN	POLY I C
INFLAMMATION MEDIATORS	METHYLPREDNISOLONE				RITUXIMAB	PROCATEROL	SEVOFLURANE	POLY ICLC		BB 3103	IMIQUIMOD
ADENOSINE ETHYLCARBOXAMIDE 05 N	RECOMBINANT UROKINASE				CYSTEINYL LEUKOTRIENE	ZINC OXIDE	KETAMINE	DIRECT THROMBIN INHIBITORS		TENOXICAM	HUMAN IMMUNOGLOBULIN A
RECOMBINANT CYTOKINES	ACETYLMURAMYL ALANYL ISOGLUTAMINE				PROTEASE INHIBITORS	TOFACITINIB	NCX 4016			AZILSARTAN	BLOOD COAGULATION FACTOR
TRIPTOLIDE	FACTOR XIII				ELASTASE INHIBITOR	GROWTH INHIBITORS	ABCIXIMAB			BET BROMODOMAINS 2/3/4 INHIBITOR OTX015	THERAPEUTIC TUMOR INFILTRATING LYMPHOCYTES
HERBIMYCIN	LIPOPEPTIDES				RECOMBINANT GRANULOCYTE COLONY STIMULATING FACTOR	NITRITE ION	DIPHENYLENEIODIUM CHLORIDE			PIRARUBICIN	PROTEIN KINASE C INHIBITOR
GLYCOSIDE HYDROLASES	EPOPROSTENOL				OK 432	CILOSTAZOL	AGLYCONE			STRONTIUM RANELATE	ULEX EUROPAEUS FLOWER EXTRACT
FENRETINIDE	RECOMBINANT INTERFERON GAMMA				4 BETA AMINOETHYLBENZOLSULFOFLUORIDE	MAPRACORAT	EPLERENONE			MESNA	TETANUS TOXOID ADSORBED
SURAMIN	RECOMBINANT INTERLEUKIN 4				7 AMINOACTINOMYCIN D	ONO 1301	PROBUCOL				AMPHOTERICIN B
4 HYDROXY 2 NONENAL	THROMBIN INHIBITORS				LOW MOLECULAR WEIGHT HEPARIN	CORM 2	AMLODIPINE				METHACHOLINE
LUTEOLIN	HIRUDIN				PIROXICAM	INDO 1	SPIRONOLACTONE				TETANUS VACCINE
LIPOXYGENASE INHIBITORS	LEVAMISOLE				SERPIN SUPERFAMILY	MK 886	U 44619				IMMUNOTOXINS
PERITONEAL DIALYSIS SOLUTION	HIRUDINS				RECOMBINANT INTERLEUKIN 8	RADIOIMMUNOCONJUGATES	LUTEIN				ANTIPLASMIN
PEONIFLORIN	CHONDROITIN 4 SULFATE				CUPRAMMONIUM CELLULOSE	GLIOTOXIN	DIPHENYLENEIODONIUM				INDIUM BLEOMYCIN
BETAMETHASONE	ALLOPURINOL				COMPOUND 48 80	TRANS RESVERATROL	FT011				BICUCULLINE
TOSYLPHENYLALANYL CHLOROMETHYL KETONE	INFLIXIMAB				LEUKADHERIN 1	EFAVIRENZ	MANOALIDE				TRYPTOPHAN
RECOMBINANT FLT3 LIGAND	CEFOTAXIME				PROXIGERMANIUM	CIGLITAZONE	LY 255283				HEPARIN SEPHAROSE
DIMETHYL FUMARATE	SODIUM DODECYL SULFATE					RHEIN	TRYPSIN				PROSTAGLANDINS I
PEPSIN A	PURINERGIC P1 RECEPTOR AGONISTS					ILOPROST	TRIFLUSAL				FLUVASTATIN
MEPRIN	ABATACEPT					PYRROLIDINE DITHIOCARBAMATE	U 75302				GAMMA GLOBULIN SERUM
MITOGEN ACTIVATED PROTEIN KINASE INHIBITOR	EGG LYSOZYME					ONO 5046	13 HYDROXYOCTADECADIENOIC ACID				CHOLIC ACID
SULFORAFAN	MONOPHOSPHORYL LIPID A					CYL 26Z	OZAGREL				CHOLIC ACIDS
MONENSIN	SR 11237					CP 105696	CINNAMATES				LOSARTAN
FOSFOMYCIN	REACTIVE BLUE 2					RWJ 67657	CINNAMATE				CARDIAC GLYCOSIDES
ALPHA,BETA METHYLENEADENOSINE 5' TRIPHOSPHATE	TENIDAP					TEPOXALIN	MENHADEN OIL				OXALATE
VISCUM ALBUM PREPARATION	TAPI 2					RECOMBINANT GRANULOCYTE MACROPHAGE COLONY STIMULATING FACTORS	TRIPAM CYS SER				BCG VACCINE
SALMETEROL	OLOPATADINE					CC 4047	R 59949				ADENOSINE TRIPHOSPHATE
SU 5416	IMMUNOL					BOLDINE	RECOMBINANT GAMMA CHEMOKINE				RECOMBINANT IMMUNE GLOBULIN
PHENYLMETHYLSULFONYL FLUORIDE	CASTANOSPERMINE					RECOMBINANT HUMAN THROMBOPOIETIN	METALLOPORPHYRINS				FIBRATES
BUTEIN	5 CHLORO 2 METHYL 4 ISOTHIAZOLIN 3 ONE					GLUCURONYL GLUCOSAMINE GLYCAN SULFATE	ROFECOXIB				MANNITOL
MYXOVIRUS RESISTANCE PROTEINS	ASPERGILLUS FUMIGATUS EXTRACT					CRANBERRY ALLERGENIC EXTRACT	COPPER SULFATE				CEFTAZIDIME
OSTHOL	MZM					CRANBERRY PREPARATION	EFLORNITHINE				FACTOR VII
CYCLOOXYGENASE 2 INHIBITORS	SC 41930					KETOTIFEN	CHEMOKINE RECEPTOR ANTAGONIST				OLMESARTAN
TETRAMETHYLPYRAZINE	COMPSTATIN					RNA SYNTHESIS INHIBITORS	TIROFIBAN				ARECOLINE
NS398	ACECLOFENAC					CETIRIZINE	EPICATECHIN 3 GALLATE				PARAFORM
HYALURONATE	MURAMIDASE					EFALIZUMAB	CILENGITIDE				PITAVASTATIN
BRYOSTATIN 1	MRS 2179					DIMEMORFAN	SARPOGRELATE				PLASMIN INHIBITOR
BISINDOLYLMALEIMIDE I	F 4614					Y 24180	CARBON BLACK				HLA DR ALPHA CHAINS
MATRINE	VTX 294					PCB 104	IMPERATORIN				DILTIAZEM
NARINGIN	BRL 50481					PHENYL BUTYRATE	RILPIVIRINE				COMPLEMENT INACTIVATING AGENTS
URSOLIC ACID	CAELYX					ISIS 2302	CICLESONIDE				SODIUM SULFIDE
CARNOSINE	ACTARIT					CV 3988	EPTIFIBATIDE				MITOMYCINS
OXOPHENYLARSINE	BEMIPARIN					WEB 2170	TERFENADINE				DIGOXIN
CORDYCEPIN	MUR NAC L ALA D ISOGLN					LORNOXICAM	ONE ALPHA				CYSTEINE PROTEINASE INHIBITORS
THIAZOLIDINEDIONES	HEXTEND					RO 31 8425	BENZYL ALCOHOL				ETANERCEPT
COBALTOUS CHLORIDE	3,3',4',5 TETRACHLOROSALICYLANILIDE					AM6 36	SCOPARONE				FACTOR VIIA
2,4 THIAZOLIDINEDIONE	DESIRUDIN					OC000459	ECULIZUMAB				AMD 3100
ADENINE NUCLEOTIDES	TRIAZOLODIAZEPINE					SC 58635	LOXORIBINE				HYPOLIPIDEMIC AGENTS
CHRYSIN						PINE BARK EXTRACT	STALLIMYCIN				CERIVASTATIN
RIBOFLAVIN						NOC 7	RIMONABANT				CURDLAN
SALICYLATE						INDOXAM	SAPORIN				LIPASE
SALICYLATES						CEPROTIN	LATANOPROST				ITRACONAZOLE
CATECHIN						DIPHENYLIODONIUM CHLORIDE	NATALIZUMAB				BEXAROTENE
OVARIAN HORMONE						DENBUFYLLINE	GAMMA TOCOPHEROL				DESOXYCORTICOSTERONE ACETATE
MATRIX METALLOPROTEINASE INHIBITORS						2,2',4,6,6' PENTACHLOROBIPHENYL	CPENSPM				PRISTANE
PENICILLIN						SALIX	CHLORELLA 11 PEPTIDE				VANILLOID
PENICILLINS						WOBE MUGOS E	BIGELOVIN				MEDICATED
BENZYLOXYCARBONYLVALYL ALANYL ASPARTYL FLUOROMETHYL KETONE							KURARIDIN				CONJUGATE VACCINE
PARTHENOLIDE							HYPERACUTE PANCREATIC CANCER VACCINE				PHOSPHORAMIDON
LYCOPENE							IDESCARPIN				FIBRIN TISSUE ADHESIVE
HA 1A							CCR5 RECEPTOR ANTAGONISTS				THIOPENTAL
NIACINAMIDE							2 OXOTHIAZOLIDINE 4 CARBOXYLATE				HUMAN IMMUNOGLOBULIN G
NINTEDANIB							ACETYLAMINOPHENYLARSINE OXIDE				INTERFERON TYPE II
LAMINARAN							WX UK1				CHONDROITIN 6 SULFATE
KETOROLAC							GR144053F				ACYCLOVIR
ALLOGENEIC LYMPHOCYTES							SKI 306X				ATENOLOL
INTRAVESICAL BCG							EICOSAPENTAENOATE				CLOTRIMAZOLE
ITF 2357							REOPRO				CYTOTOXIC AGENT
ALLICIN							PF 956980				SODIUM HYALURONATE
FLUTICASONE							SRPIN340				ANTI ASTHMATIC AGENTS
NS 398							NITROASPIRIN				COAGULATION PROTEIN
CAP18 LIPOPOLYSACCHARIDE BINDING PROTEIN							GSK2606414				VITAMIN K 1
DIALYSIS SOLUTIONS							LYSO 7				PHENOXYBENZAMINE
CAFFEIC ACID							NSC 651016				FIBRINOGEN HUMAN PLASMA DERIVED
PAMIDRONATE							N ACETYLCYSTEINAMIDE				MILTEFOSINE
OMPTIN							RAMATROBAN				ANTIFIBRINOLYTIC AGENTS
NIGERICIN							WOBENZYM				KAOLIN
TRANILAST							ABIETIC ACID				ALTEPLASE
EDELFOSINE							GAMBOGE				ETOMIDATE
ERYTHROPOIETIN							YCG 063				SEPRANOLONE
SULINDAC SULFIDE							VIOXX				GW9662
SULFASALAZINE							PHENYLAMIL				ALUMINUM HYDROXIDE
IMMUNE SERA							CATUMAXOMAB				S 27609
NELFINAVIR							ETHYL PROTOCATECHUATE				ARGATROBAN
PROTEIN SYNTHESIS INHIBITORS							3 MORPHOLINO SYDNONIMINE MONOHYDROCHLORIDE				RECOMBINANT FVIIA
CLODRONATE							PHOSPHORUS 32				3',5' DICHLOROMETHOTREXATE
CLARITHROMYCIN							2,5 DI TERT BUTYLHYDROQUINONE				LEPIRUDIN
SILYMARIN							POLY L LACTIC ACID				PHOSPHOLIPASE A2 INHIBITORS
ICI 200355							HEME ARGINATE				REPAGLINIDE
ISOACTEOSIDE							TAMIBAROTENE				PRANLUKAST
THENOYLTRIFLUOROACETONE							PICLAMILAST				FEBUXOSTAT
URANYL ACETATE							SMALLPOX VACCINE				RECOMBINANT INTERFERON BETA 1A
5 CHLOROMETHYLFLUORESCEIN DIACETATE							APO 866				ANGIOTENSIN II TYPE 1 RECEPTOR BLOCKERS
BORRELIDIN							LOVAZA				MINERALOCORTICOID RECEPTOR ANTAGONISTS
OLPRINONE							LG 268				HLA DR BETA AG
POLAPREZINC							RO 41 5253				LUXOL FAST BLUE MBS
EPINASTINE							FRUCTOOLIGOSACCHARIDE				PLATELET CONCENTRATE
CILOMILAST							ADENOSINE DIPHOSPHATE RECEPTOR ANTAGONISTS				DIPHENHYDRAMINE
ADSORBENTS							ISOANGUSTONE A				HUMAN IMMUNOGLOBULIN M
KH 1060							JTE 522				TOBRAMYCIN
SHETA2							POLYAMINE ANALOGUE				CEFUROXIME
SC 236							INT 747				ANTIDIARRHEALS
RECOMBINANT HUMAN GRANULOCYTE COLONY STIMULATING FACTOR							SPIRAMYCIN				HEMATOPORPHYRIN
METHIONYLMETHYLSULFONIUM CHLORIDE							4 BROMOPHENACYL BROMIDE				9 AMINOCAMPTOTHECIN
DICLOFENAC SODIUM							CB 3717				3 HYDROXYKYNURENINE
AZELASTINE							BACTENECIN				SYNTHETIC ANTIGENS
CIS UROCANIC ACID							CORN TRYPSIN INHIBITOR				IMMUNOGLOBULIN G
FERUMOXIDES							GAMMA THROMBIN				KREBS RINGER SOLUTION
LAMBDA CARRAGEENAN											DISUCCINIMIDYL SUBERATE
TAPI 1											PHOSPHOLIPASE A2 INHIBITOR
FK778											BIRB 796
BENZALKONIUM CHLORIDE											TOLEROGEN
COOMASSIE BRILLIANT BLUE											BECLOMETHASONE
TIGECYCLINE											INTERFERON BETA 1A
CEPHARANTHINE											PROLACTIN RELEASING HORMONE
CHYMOSTATIN											CASPOFUNGIN
SESAMOL											CETRORELIX
OPRELVEKIN											FREE RETINOL
LORATADINE											THROMBIN
USTEKINUMAB											EZN 2208
TOSYLLYSINE CHLOROMETHYL KETONE											METRIZAMIDE
ZIRCONIUM OXIDE											LACTATED RINGER'S SOLUTION
IMMUNOGLOBULIN D											LANTHANUM CARBONATE
METYRAPONE											SINGLE CHAIN UROKINASE TYPE PLASMINOGEN ACTIVATOR
FLUORO JADE											BOVINE THROMBIN
AG 126											IXAZOMIB
ROFLUMILAST											ANTITHROMBINS
AS 101											SUPLATAST TOSILATE
PKH 26											BRIVANIB ALANINATE
MILRINONE											NORGESTREL
COMPOUND 20											PHENYLALANYL LEUCYL PHENYLALANYL GLUTAMINYL PROLYL GLUTAMINYL ARGINYL PHENYLALANINAMIDE
CATHELICIDIN LL 37											TOUCHDOWN
THEAFLAVIN											RIVASTIGMINE
PENTOXIFYLLINE											HIV VACCINE
SODIUM SULFATE											RESIQUIMOD
DIFFERENTIATION INHIBITOR											HYDROETHIDINE
ANTI ALLERGIC AGENTS											PARECOXIB SODIUM
GLYCYRRHETINIC ACID											HUMAN IMMUNOGLOBULIN PRODUCT
EDETIC ACID											BILE ACID SEQUESTRANTS
COLCEMIDE											BRIMONIDINE
PIRFENIDONE											RUBITECAN
RH1 BENZOQUINONE											ORAL ANTICOAGULANTS
CICAPROST											2' FUCOSYLLACTOSE
ETHACRYNIC ACID											TOLMETIN
9,10 ANTHRAQUINONE											DG172
PROTAMINE SULPHATE											ACID CYSTEINE PROTEINASE INHIBITORS
TOCILIZUMAB											BC8
RECOMBINANT FIBROBLAST GROWTH FACTOR 1											ZINC SALTS
WITHAFERIN A											E 7010
PHOTOALLERGEN											ZARDAVERINE
ONO 6818											BIOBRAN
IMMLG5521											PLECONARIL
HAMAMELITANNIN											DIRECT FACTOR XA INHIBITORS
PINANE											FACTOR VIII
1,2,5 THIADIAZOLIDIN 3 ONE 1,1 DIOXIDE											TRASYLOL
TYRPHOSTIN AG 1288											CUROSURF
AH 13205											HUMAN INTRAVENOUS IMMUNOGLOBULINS
TILMICOSIN											CANAKINUMAB
LIPOSOMAL CURCUMIN											S 28463
PROLASTIN											INGENOL
FK 706											OKY 046
EMEDASTINE											7 NITROBENZ 2 OXA 1,3 DIAZOL 4 YLCHOLESTEROL
NPC 15669											TRIFLURIDINE
SAXATILIN											ANTI TUMOR NECROSIS FACTOR ALPHA DRUG
LASALOCID											PROTHROMBIN COMPLEX
CADEXOMER IODINE											PITAVASTATIN CALCIUM
DORNASE ALFA											CORD FACTORS
ALPHA TYPE 1 POLARIZED DENDRITIC CELLS											CALCIUM
TAPROSTENE											ACYCLIC RETINOID
CYCLOSPORIN H											RYE GRASS
REPARIXIN											ZOFENOPRILATE
INDOLICIDIN											COAGULATION FACTOR VIIIC
METHYL SALICYLATE											CI 1044
MEDICARPIN											TISSUE FACTOR PATHWAY INHIBITOR
HARPAGOSIDE											HIRULOG 1
SHOSAIKO TO											ZHANKUIC ACID A
ONO AE1 329											CROFELEMER
FLUNISOLIDE											AGNUSIDE
SOFALCONE											ALOSETRON HYDROCHLORIDE
FLUNIXIN MEGLUMINE											METHYLENE DIPHOSPHONATE
N DODECANE											TRIAZOLE ANTIFUNGAL
ACETATE											HLA G ANTIGEN
ASPHALT											SUBCUTANEOUS HEPARIN
ACETATES											GINSENOSIDE RB2
TAUROLIDINE											ONO 4007
FLUORANTHENE											DEAE SEPHADEX A 50
GAMMA INTERFERON											BN 50730
PIDOTIMOD											MONOCLONAL ANTIBODY LL2
N METHYLFORMAMIDE											BETA AMINOETHYLISOTHIURONIUM DIHYDROBROMIDE
AMINONUCLEOSIDE											BENRALIZUMAB
CARBOCYSTEINE											NADROPARIN
HEXAMINE SILVER											MCC 555
OXATOMIDE											TJ 9
AMETANTRONE											THROMBIN ALFA
CREST											FONTANA MASSON STAIN
PLATONIN											LITHOCHOLATE
CEP 11004											IRDYE 800CW
BUTANE											E5564
SUCCINIMIDE											Z 100
HELENALIN											5' DEOXY 5 FLUOROCYTIDINE
TETRAGASTRIN											NSC 640488
TRP P 1											HOMATROPINE
CORILAGIN											EPOXICONAZOLE
CLEMASTINE											DIPHTHERIA TETANUS ACELLULAR PERTUSSIS VACCINES
OM 85 BV											L 652731
SUCCINIMIDES											INOSINIC ACID
SR 11302											ALPIDEM
ANTIPYRETICS											MONOCLONAL ANTIBODY HEFI 1
IRRIGATION SOLUTIONS											BOVINE SEMINAL RIBONUCLEASE
CALCIUM PHOSPHATE CRYSTALS											HAES STERIL
POLYETHYLENE GLYCOL 8000											ROXIFIBAN ACETATE
SU 6668											MENINGITIS VACCINE
LIPOCALIN 1											RINTATOLIMOD
MOLGRAMOSTIM											AMPHOTERICIN B DEOXYCHOLATE
GOLD SODIUM THIOMALATE											EXAMETAZIME
MONOASPARTYL CHLORIN E6											FOSCAN
TALL 104											MOEXIPRILAT
DIPIVEFRIN											GS 9620
SODIUM IODATE											PHLOGENZYM
ONC201											BENZYLOXYCARBONYLPHENYLALANYLPHENYLALANINE DIAZOMETHYL KETONE
OLEANDRIN											TIAPROFENIC ACID
BONGKREKIC ACID											GI 129471
FR 167653											CITRATE PHOSPHATE DEXTROSE
NAFAMOSTAT MESILATE											WORMWOOD EXTRACT
SULPROSTONE											ARP 100
ANGIOTENSIN II											BL1521
DAMNACANTHAL											3 HYDROXYPYRIDIN 4 ONE
COMPOUND 32											HAEMACCEL
ECHINOMYCIN											TECHNETIUM TC 99M PENTETATE
ANTIMETASTATIC AGENT											ST 1571
DALTEPARIN											1 FURAN 2 YL 3 PYRIDIN 2 YL PROPENONE
CMT 3											2 AZETIDINONE
MANIDIPINE											B 428
RHUBARB PREPARATION											KD IX 73 4
CLI 095											ALVEOFACT
NF 449											POLYSORBATES
TERBINAFINE											SYNTHETIC COPOLYMER
CCI 779											TORBAFYLLINE
PYCNOGENOL											GROWTH HORMONE RECEPTOR ANTAGONIST
4 COUMARIC ACID											CRISAMICIN A
GALIXIMAB											SINGLET
PYCNOGENOLS											HIF 2ALPHA INHIBITOR PT2385
XMD 8 92											PKSI 527
LGD 1069											S 2238
CECROPINS											LANOTEPLASE
DAK 16											ANTIPROTOZOAL AGENTS
FLECAINIDE ACETATE											ZINQUIN
1 PHENAZINECARBOXYLIC ACID											SPIRADOLINE
YM 47141											AN3485
P 1507											PEG PLGA
REPANDOSIDE											AN6414
KN 04											JZP 430
MUTEIN 6											DIPHTHERIA ANTITOXIN
L 658758											SUCCINYLALBUMIN
BDPT											OCTOCOG ALFA
ASCARIDOLE											CORBRIN
AGRIMONIIN											REACTIVE RED 2
6 HYDROXY 2,4,7 TRIMETHOXYPHENANTHRENE											MS 247
LIPEGFILGRASTIM											BRIMONIDINE TARTRATE TIMOLOL MALEATE DRUG COMBINATION
TMI 1											PENTETATE
HESPERIDIN METHYL CHALONE											AM 5206
MDL 101028											ARACYTIN
3' CHLORO 5,7 DIMETHOXYISOFLAVONE											OCTIMIBATE
RACTOPAMINE HYDROCHLORIDE											SY 640
NITROFLURBIPROFEN											ATROPA BELLADONNA
RECOMBINANT CTAP III											CHO DEUNG SAN
POLUDAN											LY 223982
ISIS 2922											RU 27987
PROSOM											HUMAN PLASMA PREPARATION
RK I 123											EUROPEAN OLIVE POLLEN EXTRACT
POLYHEXAMETHYLENE BIGUANIDE											PENTADECYLAMINE
ACETYL AMVSEFLKQAWIENEEQEYVVQTVK											CGS 23885
HWA 138											TETRASTARCH
GLUTAMYL GLYCYL ARGINYL CHLOROMETHYL KETONE											BALUGRASTIM
GLYCYL PROLYL ARGININE											LERISETRON
SANTONIN RELATED COMPOUND 2											MHY407
PD 098063											ZOLPIDEM TARTRATE
RP 55778											CARBOXYCINNAMIC ACID BISHYDROXAMIDE
RHESUS ROTAVIRUS VACCINE											OPHTHALMIC PREPARATION
ON09310											FIRATEGRAST
AW00179											CT 1418
IRFI 042											MDL 27695
BIIL 284											RECOMBINANT HUMAN ALBUMIN HUMAN GRANULOCYTE COLONY STIMULATING FACTOR
GLIOVIRIN											1 CYCLOHEXYL 3 DODECYLUREA
NPB001 05											GALMIC
BB 2275											BMS 817399
RO 23 9424											BMS 457
IMUNOFAN											CDMI
BVT173187											PROVERA
BECLOMETHASONE 17 MONOPROPIONATE											DEXTRAN T 70
2 METHYL 4 ISOTHIAZOLIN 3 ONE											HAEMOPHILUS INFLUENZAE TYPE B POLYSACCHARIDE NEISSERIA MENINGITIDIS OUTER MEMBRANE PROTEIN CONJUGATE VACCINE
ALPHA HEXYLCINNAMALDEHYDE											LEONURUS CARDIACA EXTRACT
FUSIDATE SODIUM											1,2 DIAMINO 4,5 METHYLENEDIOXYBENZENE
MALTOTETRAOSE											ICI 128436
POLYMYXIN B SULFATE											M NITROBENZOYLALANINE
BUTRIN											LYSOCELLIN
DIPHTHERIA TETANUS TOXOIDS											SSR180575
CSL 32
ISOBUTRIN
TRIFLUOPERAZINE HYDROCHLORIDE
YAKUCHINONE A
ONOPORDUM EXTRACT
SODIUM ASCORBYL PHOSPHATE
VINYL ETHER
SALICIN EXTRACT
PLANTAGO LANCEOLATA LEAF EXTRACT
AZADIRONE
CEPHAMYCINS
OHIOENSIN F
PAPCX
PARTHENIUM HYSTEROPHORUS EXTRACT
OLODATEROL
CT 1501R
MABTHERA
HYPOTHIOCYANITE
SDZ MRL 953
CP 195543
DIGITOXIGENIN
CDP 571
CDP870
MR 889
PF 04418948
BUDLEIN A
CI 949
NAPROXEN N BUTYL NITRATE
SOLITHROMYCIN
PD 144795
SALICORTIN
3 DEOXYSAPPANCHALCONE
RETINYL RETINOATE
TYRPHOSTIN AG 126
PIMARIC ACID
ALLERGINA
DIOSMECTITE
AH 23848B
PYRANOPROFEN
CV 159
ONO AP 324
SEPTILIN
TEA TREE OIL
IMMTHER
BRAIN NATRIURETIC PEPTIDE 45
CG100649
ELLA
CSY 0073
T ACTIVIN
NNKOAC
HOCHU EKKI TO
2,3 DIHYDROXYBENZOIC ACID
SC 10
CI 959
7 OME APBT
SB 656933
GLUCOSAMINE
XANTHOTOXOL
ARACHIDONATE 12 LIPOXYGENASE INHIBITORS
LONOMYCIN
VETERINARY DRUGS
HUMIRA
MGN1703
HUMAN LEUKOCYTE ELASTASE INHIBITOR
IRSOGLADINE MALEATE
ECABET SODIUM
CHLOROPROCAINE
MDX H210 ANTIBODY
BROMIDE ION
BERBERRUBINE
CLADOSPORIUM HERBARUM EXTRACT
CNCM
ANGIOGEN
ARACHIDONATE 15 LIPOXYGENASE INHIBITORS
CHLOROACETIC ACID
DALFOPRISTIN / QUINUPRISTIN
PROCYANIDIN B1
ADENOSINE A3 RECEPTOR AGONIST CF102
RU24858
BEPOTASTINE
KELATORPHAN
ROMURTIDE
U 74389G
CORN SILK PREPARATION
6 CHLORO 2',3' DIDEOXYGUANOSINE
CALCOFLUOR WHITE
U 74389F
PD IA
GSK2656157
PURINERGIC P2 RECEPTOR AGONISTS
ENNIATIN B
JM 34
BXT 51072
BAY 73 6691
HUMULON
VERTICILLIN A
CREBANINE
NARASIN
SECURININE
SIM 010603
KJE
XL184
CEVIMELINE
MVA 85A
JTE 607
ENPROSTIL
TOCOPHEROL ACETATE
POLYPHENON E
PENTAMIDINE ISETHIONATE
FELINE INFECTIOUS PERITONITIS VIRUS VACCINE
ORAL POLIOVIRUS VACCINE
BWA868C
2 DEOXY 2,3 DEHYDRO N ACETYLNEURAMINIC ACID
ACETOPYRROTHINE
ELASTATINAL
APRICOXIB
MC1575
CAY 10441
SOPHORIDINE
ZOMETA
ANASTELLIN
OXIDIZED CELLULOSE
PHLOXINE
ANTITHROMBIN III
ALLOFERON
TUMOR VASCULATURE TARGETED TUMOR NECROSIS FACTOR ALPHA
ACANTHOIC ACID
