# Supplementary material for: Activation of Vitamin D Receptor Pathway Enhances Differentiating Capacity in Acute Myeloid Leukemia with Isocitrate Dehydrogenase Mutations
Source: Preprints.org preprint supplement (doi:10.20944/preprints202108.0529.v1), 2021-08-27
Supplement: Supplementary file 2 [file Sabatier et al (2021) Supplemental Table 1.xlsx]

## Sheet: Table S1
Table S1 : Gene signature (related to Figure 1A)
HL60MUT (Boutzen et al., 2016)		HL60WT +2HG (Boutzen et al., 2016)	IDHMUT patient (TCGA)		IDHMUT patient (Verhaak)
Upregulated and Downregulated (>+/-1.5-fold change) genes in HL60 IDH1-R132H to WT IDH1 (Boutzen et al., 2016)	Downregulated (>+/- 0.667-fold change et pv<0.05) genes in HL60 IDH1-R132H to WT IDH1 (Boutzen et al., 2016)	ATRA responsive genes in WT+2HG (FDR<0.05) (Boutzen et al., 2016)	Upregulated and Downregulated (>+/- 1.5-fold change et pv<0.05) genes in mutant IDH to WT IDH	Downregulated (>+/- 0.667-fold change et pv<0.05) genes in mutant IDH1 to WT IDH	Upregulated and Downregulated (>+/- 1.5-fold change et pv<0.05) genes in mutant IDH to WT IDH
CCNA1	CLECL1	XK	CYP27C1	CARNS1	ELL2
NFATC2	ZNF429	VIM-AS1	STL	GPR183	SELL
MNDA	ZNF431	TYROBP	ATP1A3	RBM47	DNM1
PRTN3	IGLJ3	TTLL11-IT1	CYMP	TDO2	CDK3
CPT1A	GPR174	TRIB1	ZFP112	CTXN1	GAB2
SLCO4C1	ZNF551	TNRC6C-AS1	NMT2	NPBWR2	AMY1A /// AMY1B ///
IL8	ZNF680	TNFAIP2	NCRNA00246B	SPAG6	SSBP2
DSG2	ZNF714	TLR3	DOC2A	HCRTR2	MEIS1
SCPEP1	GALNT3	THSD7A	PGAP1	LOC100129935	TRIM73
LYZ	IGLL1	THEMIS2	OBSL1	PHKG1	PBX3
GLIPR1	T1560	TCN1	ABCA3	GAS2L3	STAR
ANPEP	ZNF350	SUCNR1	OR2L13	OTC	MARCKSL1
CCR7	CRIM1	SREBF1	FLRT3	M41	FOSL2
CD68	SH2D4A	SQRDL	CCDC102A	IFI30	RGC32
ACSS2	FSTL5	SPRY1	F3	LOC100128098	C1ORF186
PTGR1	ZNF83	SPECC1	COL4A5	CDKN1A	LOC286052
TNF	CLC	SMOX	C14orf79	NPPA	ARL4A
CEBPA	ZNF675	SMIM3	LOC400891	LOC400084	PRICKLE1
TRIM71	GPR65	SLC44A1	PTGR2	KCTD21	USP44
DHRS9	ZNF544	SLC16A9	INHBE	PLBD1	HOXA4
TNFAIP3	ZNF530	SLA	INSL3	FSTL5	SLC35F2
PTPRJ	ZNF790	SIGLEC5	PRKD3	GAFA1	DACH1
P2RX7	ZNF850	SERPINB8	MAK	PTPRK	BTBD11
JUP	SH3BGRL2	SERPINB2	H2BFM	FAM9C	SNCAIP
CTSG	ZNF814	SERPINB10	ST7OT1	CD86	ADAM17
MS4A3	ZNF260	SERPINB1	DOCK4	WDR16	PELI2
LTBR	CST7	SELP	COL24A1	LOC100130468	HOXB2
RET	MIR181B2	SELL	ZBTB16	FBXL2	MIRN21
FCGR1A	IL1RL1	SCUBE1	CPA3	CEACAM6	NXF3
CD300A	TCF4	SCPEP1	SLC16A9	SOX14	GPC4
AZU1	YME1L1	SAT1	MYCN	RBP1	DPYSL3
LGALS1	ZNF550	RXRA	HOXA9	SLC30A2	HOXA10
KLF6	ANXA3	ROGDI	GOLGA8B	LOC100505832	TMEM49
GBP2	SMIM10	ROCK1P1	HTRA3	UTS2	FAM46A
APOBEC3G	RAB27B	RNU5B-1	SCGB2A2	ELTD1	NFIL3
APOBEC3D	NFE2L3	RCSD1	WDFY3	RASGEF1A	SLC9A3
NRP1	HEG1	RALGAPA2	CDH2	DSCAML1	TES
JUN	CEP70	RAB31	LOC644538	MCOLN2	IRX5
ME1	MIR3198-1	PVRL1	ANKRD33B	LOC388210	FUT4
TSHZ3	CD38	PTGS1	LRP12	SEPX1	PGAP1
METTL7A	TRAJ36	PSMB10	FLJ41455	SP5	ATP2B1
PREX1	HPSE	PRTN3	SH3BGRL2	UPP1	RASAL2
AHNAK	AAK1	PRKCB	LHFP	LOC642345	FGFRL1
STEAP3	EXOC6B	PRG2	SLC9A7	GLRX	CFD
MIR33B	CBX5	PRAM1	PABPC4L	ODZ4	AK5
ZNF385A	FAM134B	PPP1R18	KIT	CD1B	CHD7
STAR	ZNF430	PLEK	LRRC56	MAS1L	AZU1
TYROBP	XYLT1	PLCB2	MLLT11	ANXA13	LOC285148
SERPINB1	ZNF708	PIWIL4	MFI2	LOC100128946	HNRPLL
SESN3	TRAJ38	PARP14	TWISTNB	BCL2A1	SKIL
ITGA6	TFPI	OSM	CBX2	SLITRK1	JAG1
PLXNB2	ZNF345	OAS3	CRISPLD1	ALS2CR12	HOXB6
CFD	GPR27	NOG	GRAMD1C	SLC25A18	LOC652226
TNFAIP2	ANXA1	NFE2	RASAL2	RBM20	COL4A5
TEX15	ANTXR1	NDRG1	KISS1R	ABRA	HOXA3
CD300C	ZNF721	NCF2	KHDRBS3	ITIH3	NRXN2
TNFRSF10D	EML5	NCF1C	CLDN10	RNASE3	RFX2
TSPAN14	DACH1	NCF1B	CCDC122	ARSJ	HOXA5
MS4A7	SLC22A16	MOV10	SERPINH1	WDR87	DSC2
STXBP5L	ZDHHC23	MIR548D1	TRAT1	LOC100506495	HOXB3
LPPR3	IGLJ7	MIR181B1	PON2	THBD	MXD1
YME1L1	TRBV5-4	MICAL2	TFPI	TKTL1	LOC643911 /// LOC650
CLEC12A	ZNF566	METTL7A	NRXN2	DKFZP434F142	CTSG
VIM	UBXN10	MCEMP1	CHST13	PLA2G10	NKX2-3
MIR223	PDE7B	LOC100506459	RAB9B	SPIB	S100A10
PCED1B-AS1	EPX	LINC00649	C19orf77	DNTT	CD9
PTGS1	CCDC141	LFNG	C1orf186	VNN1	HOXA9
PRSS57	MIR361	LBR	RBP4	GNPDA1	MPO
EMILIN2	TRBV6-6	KRTAP9-3	ZNF324	ABCC6	CCNA1
CMTM7	TRAJ45	KDM7A	LOC154761	BEAN1	HOMER3
HGF	CYP4V2	ITGB7	HDGFRP3	ALDH4A1	MGC33556
CCL3L3	LUM	ITGAX	OSM	LOC253044	NEGR1
KLF7	MIR4521	ITGAM	ENO2	TULP1	MYCN
LILRA2	KRCC1	ITGA5	EGR1	KIAA0825	TPSAB1 /// TPSB2 ///
ARMCX6	IFITM1	IRF1	NPM2	LILRB3	TPSAB1
CR1	TRAJ34	IL6R	FAM57A	LOC283033	EREG
DDIT4	SESTD1	IL10RB-AS1	DPY19L2	IL1F8	RASGRP3
ALDOC	NLRC3	IER3	NUDT9P1	UCP2	MAMDC2
IL6ST	IL5RA	ICAM1	EMID1	RPS6KL1	CA2
APBB1IP	IFITM2	HOXA1	DPYSL3	C1orf49	IRX3
METTL7B	KRT6C	HNRNPLL	LOC401097	ARHGAP31	CCDC3
ARNTL	CLDN12	HLA-L	CD59	CTTNBP2	BEX1
FKBP3	CGREF1	HIC1	HMBOX1	C4orf34
HVCN1	ACTR3B	HGF	SCML1	SAMD4A
GPR84	FAM46C	GZMA	TANC2	GIMAP7
BPI	SASH3	GVINP1	SMAD1	ADCY8
CXCL10	LNP1	GRN	CENPV	EPAS1
FOSL2	TMEM14A	GPR174	SEPP1	CLRN3
LYST	CSTF2T	GPR132	ZNF711	CDH5
IL6R	MYH15	GNG2	LRRN1	KCNJ11
THEMIS2	ZNF573	GBP3	CCDC3	C6orf138
DDIT3	HES1	GBP2	DNM1	DKK2
MTL5	SAMD9L	GALM	HMGN5	NLRC4
NFE2	UBE2E3	FLOT1	ARHGAP5	LHX6
ARRB1	PLCH1	FGR	ATP6AP1L	SLC38A4
SGPP1	ZNF613	FGFBP3	MAP1A	SNX31
TET1	TIGD2	FBP1	CDK14	HIST1H4D
IFI30	IGFBP2	FAM46C	USP53	ALOX5
PSTPIP2	TRAJ56	F5	IGF1R	TNF
ELANE	FAM171B	ERAP2	FLJ41484	XK
HSPA1B	FAHD2B	EPX	C1orf21	FAM9B
EMR2	NCALD	EPAS1	PP13439	IFNK
C5AR1	ZNF8	EMILIN2	SERPINE1	LOC100505964
SSBP3	ZDHHC14	ELF4	CYP11A1	HOXB1
VCL	PCSK6	EDIL3	C5orf30	NAT8
PXN	CABLES1	DTX3L	LOC100127983	TIMP1
JHDM1D	RIMKLB	DOCK5	ANKRD37	CA3
PTGER4	MIR563	DNAJB12	LOC283861	KLRF1
LDLRAD3	MIR29C	DHRS9	TRIM6	PHYHD1
RAB39A	septin 11	DHRS3	LOC100101266	LOC285972
ANKRD22	CYB5A	DEFB115	GPHN	CD68
SLAMF6	THSD7A	DDX60	FAM135A	LONRF2
ARMCX3	TFR2	DDIT4	LOC100506451	HTR3B
PVR	PROK2	CYTH4	AASS	LOC497256
S100A13	KBTBD7	CYBB	TMEM99	ASB2
FHL3	SLC9A7	CTSO	ZNF880	VLDLR
KITLG	ZNF264	CLEC12A	FAM89A	FGD4
LMNA	YME1L1	CFP	TLR3	CLEC1B
TRAM1	DBP	CELSR3-AS1	GPSM1	CD19
RXRA	TESPA1	CEBPA	ZNF257	C17orf44
CD86	EXPH5	CD53	MAP7	SYTL5
OAS3	WDR17	CD38	PHGDH	NCAN
ILDR2		CD300LB	ZBTB10	LOC439938
RNFT1		CD300A	ZNF251	LRG1
ENTPD1		CCR1	LOC400986	FIBCD1
HLA-C		CCNA1	CLGN	MGC87042
DNM1		CCL20	LOC100506010	SERPINB2
TMBIM1		CCL2	DSC2	KCTD7
EVI2B		CARD6	ZNF578	ZRSR1
SLC25A6		C1orf106	AUTS2	GIMAP4
STXBP6		C16orf54	ATP1B1	C10orf44
SLC16A3		C10orf54	PROK2	MARCO
ZNF611		ARL14EPL	ZNF677	LOC100505478
MARCH3		ARHGAP9	STMN3	HAP1
METRNL		ARHGAP12	C15orf52	BEST2
RBFOX2		APOL6	XYLT1	LRP3
TRIM69		APBB1IP	SRSF12	LOC780529
CSF3R		AP1S2	CCRL1	FAT4
HPCAL1		ALOX5AP	SMO	C10orf116
TUBA1A		ADGRG5	SLAIN1	OR2J3
PTGER2		ADGRG3	RHOBTB1	PYHIN1
FCGR1B		ACSL1	FLJ45482	FAM53A
GGT5		ACPP	GPR125	OR1J4
CYTH4			C21orf96	VIT
ITGAX			DST	CHST15
METTL23			LOC100128252	XPNPEP2
LACTB			ZNF493	DEFB125
CD82			LOC388692	LOC100129029
PNRC1			ITGAV	LOC348751
ST6GALNAC6			ZNF219	MICAL2
RNASE6			NCRNA00260	FCRLB
TSSK3			CD99P1	HSD17B3
RETN			PAWR	BASE
BNIP3			ANGPT1	OR1A2
TBC1D30			AK4	CLEC4E
RASA4			NPDC1	C20orf85
COIL			PHOSPHO2	GNAT2
EHBP1L1			MANEAL	PDE4A
GPR114			TCEA2	APOBEC3A
MRAP2			SLITRK4	C14orf86
MED13L			ABCA2	NXPH2
HK1			ZNF667	OR10D3
MS4A6A			SEMA4C	POU3F3
LILRB1			H2BFXP	ARMC9
CD244			LOC100505687	FAM26D
GLO1			RNF217	SIGLEC15
TM6SF1			GPR162	GJA10
SLC2A3			CPNE8	OR4D2
TLR6			MCHR2	HTATIP2
WIPI1			C11orf95	PRLR
KLF10			DCBLD2	LOC149703
RCAN3			CHST12	LILRB2
SLCO3A1			LOC727916	NCALD
ITGA5			LOC100507266	NAPSB
TSC22D3			UCN	CCDC64B
PARP12			TMSB15B	SGMS2
FURIN			GPR27	KNG1
APOBEC3F			P2RY11	CLCN1
MIR3161			BAG2	FBXL21
BCL6			LOC100272216	POU5F1P3
TXNIP			C14orf128	MEIG1
NOG			ZCCHC18	SLC7A13
STAT6			SPNS2	TAS2R41
SESN2			C15orf5	SLAMF7
HSPA1A			ZNF395	NLRP2
IL13RA1			NGFRAP1	CSTA
TLE4			MMP2	EME2
TP53BP2			LAMB2P1	HK3
ZEB1			KIAA1683	GRM2
SSH3			CHD7	PAX7
PPP1R26			NOXA1	NCR1
MIR520F			PKIA	LOC100506795
DNMBP			ADARB1	PRICKLE3
NLRC4			WBP5	RHBDL2
P2RY2			SMAD5	C16orf89
UBL3			FGFRL1	PRLHR
LTA4H			JMY	LGALS13
GBGT1			NCRNA00173	PKIB
SLC39A14			TMEM22	TAF7L
QPRT			CXXC5	ASGR1
ICAM1			LOC100288152	VGLL3
ADD2				GAS1
PLOD1				ARL5C
DENND5A				DNAJC15
ITGAM				LRRC18
TNFRSF10B				JOSD2
				CYBB
				ZFYVE28
				ISG15
				ARMC3
				SIGLEC16
				C3orf43
				CFP
				CD14
				C17orf46
				IRG1
				KRT12
				TLR5
				RIMS1
				LAIR2
				PANK1
				AQP9
				KRT80
				GPR65
				FCAR
				SPEM1
				OR2F1
				AZU1
				LOC339535
				KCNA5
				HLA-DRB6
				MYCL1
				NTN4
				AKR1B1
				KLF5
				MYL1
				STATH
				DUOX2
				CHRM1
				SLC37A2
				HSD17B6
				VNN2
				RNASE2
				LOC151174
				RRAD
				SLC34A1
				CCR4
				COL4A1
				LOC100287114
				DGAT2
				LHFPL1
				CYP51A1
				CRNN
				ATP10A
				HAVCR1
				PTGDS
				LOC100507244
				FCN3
				SLC26A9
				CLEC4D
				MGAM
				AXDND1
				LACRT
				CYP2C8
				CCL17
				OSCAR
				C17orf59
				LOC254099
				CRYBA1
				KRTAP10-11
				STEAP4
				ZSCAN4
				CDO1
				VGF
				C21orf128
				CHST7
				TFPI2
				GADL1
				CXADR
				CLEC7A
				LOC100133790
				ALDH2
				FCHO1
				LOC100132116
				EPHX1
				GIMAP6
				OR7E24
				ST5
				C6orf58
				S100A9
				CDH18
				KIAA0930
				SLC41A1
				PRAMEF10
				CLEC4F
				OVOL2
				RPL39L
				MARCH2
				HCP5
				NEFM
				CYP46A1
				ATP1A2
				NHSL2
				KLF4
				KIAA1274
				LOC729970
				RBM11
				C2orf46
				ABCG2
				KIR3DL3
				LOC644714
				AFF3
				C15orf56
				TAC4
				CR2
				ALB
				PCDHB16
				CLEC1A
				ROBO1
				LOC100128343
				ATP6V0D1
				HCG11
				NPC1L1
				EVC
				HES6
				SEMA3C
				LOC728192
				PNLIPRP3
				ASAH2B
				BTBD17
				INSM2
				IER3
				CLDN6
				KANK4
				POM121L12
				UMODL1
				FLJ35024
				PAH
				LOC100507391
				TMEM145
				ARSI
				HTR6
				CDH13
				CYBA
				ZNF703
				LOC100287030
				APOF
				HIST1H2AL
				LOC728114
				PEBP4
				GPRC5A
				TTLL13
				TRIM29
				C2orf3
				AKAP5
				LOC728805
				ADORA3
				MAG
				MYBPC2
				ASPA
				PADI4
				CYP2C18
				LOC645323
				PCDHGA9
				LOC100131496
				NOS1AP
				HPR
				ALMS1P
				RBP7
				GDAP1L1
				SCGB2A1
				RPL10L
				OR2J2
				SHC3
				PADI2
				DBH
				C19orf47
				SGSH
				S100A8
				HOXC6
				GPRIN1
				FCGR3B
				HOXD8
				MEOX2
				SLC11A1
				MS4A7
				LPXN
				CNTNAP1
				GNS
				VSIG4
				HLA-DPA1
				C2
				MMP13
				DRP2
				KIAA1755
				GCH1
				TMEM200A
				GIMAP1
				CLC
				ODF4
				B3GALT4
				HIC1
				AIM1
				SYCN
				DKFZp547J222
				PNOC
				BASP1
				CCDC19
				C15orf55
				DUSP9
				ADIG
				LPCAT1
				S100A1
				PDC
				SH3PXD2A
				ARC
				TRPM8
				OR5P3
				ST14
				GLT1D1
				HNMT
				ZNF705G
				LOC400238
				CALHM3
				LOC100129058
				CC2D2A
				MAGEB18
				STAB1
				NUDT16P1
				LRRC29
				PACRG
				SLITRK2
				EDDM3B
				DOK3
				PILRA
				SLC26A4
				PRSS50
				GPR158
				LOC100130452
				VCX2
				LILRA6
				ANKRD45
				ZFR2
				NLRC5
				CNN3
				NCRNA00189
				FGR
				LOC285857
				C16orf81
				HLA-DOA
				CFHR4
				OR12D2
				DIO3
				STAB2
				MIA2
				SLCO5A1
				CREB5
				PEG3-AS1
				GRN
				SUCLG2
				DAPL1
				USP18
				ANKRD30A
				MDGA2
				OR2L1P
				KLHDC7B
				ANXA2P2
				NPBWR1
				ZIC4
				C7orf10
				CD4
				RXRA
				SLC5A12
				IL23R
				IFIT1
				SERPINB9
				SCGB1A1
				C10orf113
				ZNF438
				ANGPTL6
				ADH6
				KIR2DL2
				GRHL1
				ARTN
				LGALS3
				LILRA1
				SGCZ
				ESRP1
				KRTAP3-3
				STXBP2
				NR1I2
				SCN4B
				NCF1C
				TRIP6
				MNDA
				C10orf27
				HSF5
				ASZ1
				SPIN2A
				TLX2
				FGF8
				IGSF6
				GPX5
				CLPB
				IGSF5
				RIPPLY2
				KL
				FAM107B
				TYMP
				SOX3
				NGB
				MEGF10
				LOC646484
				FAM65B
				SERPINA1
				B3GNT3
				WNT5B
				C13orf18
				PTPRN2
				KBTBD5
				TRIM7
				C5AR1
				TBL1Y
				NBPF8
				LOC284798
				STX11
				HLA-DQB1
				C2orf50
				BAIAP2L1
				ODZ3
				DOCK1
				GOLGA6A
				RANBP17
				GGT5
				LOC401176
				UMOD
				GALR1
				COL23A1
				PPM1M
				MCOLN1
				C3orf48
				RIMKLB
				FAM46D
				FAM3B
				LPAR5
				HSPA6
				HHLA2
				SLC15A3
				FABP1
				ZSCAN10
				RHOU
				LOC283112
				LOC643763
				CCR1
				ANXA6
				EYA2
				CA5A
				SRRM3
				SUN3
				C9orf72
				FAAH
				SLC27A3
				KCTD4
				OR51B4
				B3GAT1
				C1orf111
				GPER
				TNNI2
				PDGFRA
				MANSC1
				C15orf62
				LY6G6D
				CST7
				NME3
				LOC100127974
				HSPB1
				CST3
				LTK
				EFS
				LOC100288860
				CDK20
				PAX4
				GRB14
				ZNF750
				OR2F2
				LOC100505540
				ARHGAP24
				MAP7D2
				LHX9
				GALM
				LDLR
				FRMD4A
				IPCEF1
				TNFSF12
				HRH1
				HMGB4
				MGAT5
				TNFSF8
				GPX3
				SEMA3G
				SYT4
				TBC1D9
				FLJ39632
				C2orf58
				TSPO
				RAB3B
				FPR2
				BPI
				ITGAL
				ZNF442
				TNFAIP6
				CD96
				LOC283485
				OTUB2
				PCDH7
				CLSTN2
				LILRA2
				ZNF815
				C6orf124
				TNMD
				FIGF
				LOC339316
				SAA3P
				ACE2
				GPNMB
				RBP3
				HLA-DRA
				CDA
				EPYC
				NT5E
				TDRD7
				ANO1
				UROC1
				LOC285286
				CLEC10A
				C9orf144
				CD36
				CX3CR1
				SCPEP1
				CRYGB
				KIR2DL4
				ARSG
				PECAM1
				CPE
				PNPLA1
				GHRHR
				CXorf21
				DOCK9
				SIGLEC9
				C3orf47
				KCNK6
				CXCL16
				SLC28A2
				AMICA1
				C16orf3
				CCDC144C
				SP8
				ITGAM
				PDE7B
				SH2B3
				SLC7A7
				HLA-DMA
				GPM6B
				PTPRJ
				SCG5
				APCDD1L
				QRFPR
				LOC401324
				HIST1H2BK
				CAPN12
				LOC440900
				CLECL1
				WFDC1
				LOC100505633
				CARD18
				RNF148
				HSPC159
				MST1P9
				CD33
				CD74
				LOC730755
				SERPINI2
				DENND2D
				PART1
				GIMAP8
				MGC42157
				PLEKHA7
				CES1
				MYBPH
				MYCBPAP
				EFHD1
				SIGLEC5
				KAZALD1
				TEKT3
				TNFRSF11A
				REXO1L1
				AGXT
				SLC26A3
				CD300LF
				ARHGAP39
				PRG3
				SLC44A3
				HDAC9
				OSTalpha
				CNTN4
				GCNT2
				TPK1
				LOC285778
				GPRIN3
				C20orf186
				XCR1
				CD1A
				C1orf116
				CCDC153
				PLIN4
				OR4C1P
				FBXO6
				ARHGEF10L
				NAGK
				EHD3
				FCER1A
				LIPJ
				BANK1
				RAB31
				TBX15
				DLL4
				PLAC4
				ANXA2
				LOC728342
				C21orf56
				TLCD1
				RIT2
				SERPINB8
				HLA-DQA1
				SLC18A3
				ATP4A
				LOC284669
				CIB2
				LY9
				KLK15
				CD1D
				FGGY
				AGTRAP
				LOC729059
				LOC100506655
				IL1F10
				CALML4
				HORMAD1
				C1orf65
				ZNF718
				OPLAH
				LOC285419
				OGFRL1
				KCTD12
				GRASPOS
				GRIP2
				ZIC3
				C2orf55
				VIPR2
				MPZL3
				NPFFR2
				IFIT5
				CD80
				TNFSF13B
				LOC339260
				MGMT
				NEDD9
				NTM
				MARCH1
				P2RY13
				C5orf32
				NAV1
				CCL24
				KIAA1239
				LOC100287628
				TYROBP
				LY96
				AVPR1B
				CCDC65
				TDRD12
				MYPN
				BHMT2
				IL10RA
				GLTPD2
				CALD1
				NOD2
				LOC283484
				UNC93B1
				ZSCAN12P1
				LOC100293532
				C19orf59
				LOC100506714
				LOC388948
				MOGAT1
				KIAA0087
				ZFHX3
				CDH7
				COL8A2
				SPRR2G
				TLR8
				PDZD3
				C5orf47
				TMEM150B
				GLDC
				SLC22A2
				CAPN9
				PRTN3
				TEAD2
				TRIM10
				MIPOL1
				APOC2
				GAGE3
				ACOT4
				FAM82B
				EPB41L2
				FBP1
				GCET2
				GNAL
				FPR3
				KBTBD8
				NCF4
				RGS10
				SLC25A41
				SIGLEC7
				SNX21
				HOXC13
				HIST1H3I
				SLIT1
				MS4A2
				LOC100216479
				LRP1
				CASQ1
				KRT78
				LRRC32
				BCL2L10
				HTR3A
				LOXL3
				SLC44A5
				LPPR5
				TSPAN16
				CALCB
				SAMHD1
				FAS-AS1
				PHLDB2
				TFR2
				AGR2
				ZBTB38
				C14orf184
				PLTP
				ZNF536
				IL1RL2
				C21orf116
				FLJ42709
				FCGR2A
				C5orf20
				ACOX2
				CECR1
				SLC6A12
				NFAM1
				HERC2P3
				CD1C
				SLC2A12
				ALOX5AP
				NOTCH4
				DAP
				EPHB3
				QPCT
				GPR68
				MX1
				FCER1G
				CD101
				LOC643529
				DOCK10
				TREM2
				LOC730091
				PDPN
				CSN1S1
				GCHFR
				LRRIQ3
				HLA-DPB2
				SSTR4
				ZNF518B
				MS4A4A
				IL12RB1
				FLJ32790
				ST7OT4
				DHRS9
				A2LD1
				GP1BA
				GLB1L
				DKFZP761C1711
				THBS4
				TRIM72
				PRDM13
				TMEM130
				RTP4
				C12orf5
				ACAT1
				LYVE1
				GRIN2A
				LRP1B
				CTSS
				MS4A14
				KCNN3
				CRB1
				LPAL2
				PDLIM1
				LILRB1
				HLA-DPB1
				LOC386597
				HBZ
				IL5RA
				HVCN1
				GKN2
				HLF
				ENC1
				LOXHD1
				IL2RG
				TMEM47
				GALC
				PNP
				LPAR6
				ABCA9
				FRMD3
				SLC22A23
				HAVCR2
				NLRP12
				LOC284865
				BST1
				EDNRA
				WNK2
				C1orf53
				PSRC1
				RFPL1
				PIK3R5
				C20orf103
				FAM19A4
				CACNG4
				MGC2848
				ADAP2
				SLFN13
				TMC4
				SLC26A7
				TMEM144
				CD200R1
				CDHR3
				LOC100131262
				BPIL2
				CD1E
				TSHZ3
				C1orf170
				SMPD3
				MECOM
				CUX2
				SH2D1A
				SH3D21
				MEGF9
				SLC2A8
				GAPDHS
				GRID2
				CSF2RA
				LOC286121
				NCF2
				LST1
				DOK2
				ZNF185
				HEXIM2
				CLEC12B
				BLNK
				RIBC2
				CDC42BPB
				GPR15
				TEAD1
				RNASE1
				C1orf46
				FCGR2B
				C19orf26
				UGT8
				MICAL1
				PRSS47
				KIF16B
				NUDT19
				C7orf57
				DPPA4
				APOL4
				SRL
				LOC151438
				FAM105A
				PAK6
				SLC24A4
				DYSF
				LOC100505826
				AKAP7
				IFI44
				SERPIND1
				CSF3
				KRT35
				BTNL8
				PIH1D2
				LOC284788
				TCEANC2
				MYOF
				NPL
				PFKFB2
				PRAME
				OR7E19P
				ZNF385A
				TPPP2
				UBASH3B
				CD300C
				ZNF684
				NEK6
				HNF1B
				LIPA
				KCNB2
				TUBA4A
				NAAA
				DENND2A
				FLJ25328
				SNX29
				SERPINF1
				INTS4L1
				LOC100129794
				SPATA12
				VSTM1
				SIGLEC11
				DHRS3
				STARD8
				ATP10B
				CMTM2
				CMKLR1
				RNF175
				CD300LB
				RASSF4
				CLTCL1
				RAPGEF5
				S100P
				MMEL1
				CR1
				LOC200772
				IL1RN
				GPBAR1
				LOC100287547
				WFDC6
				NLRP14
				P2RY6
				FCGRT
				BRSK1
				C3orf45
				FERD3L
				ZNF167
				PP14571
				EPOR
				FLJ20712
				RNH1
				FCGR2C
				ERCC2
				PTPRT
				MRPS15
				LOC100505967
				AIG1
				F5
				C10orf128
				ANKRD53
				RHBDL3
				CTSH
				C17orf51
				MPEG1
				ACER1
				CDH23
				MLF1
				KAZN
				CCR2
				CXCL9
				ZFP90
				TMEM104
				PALM3
				PTPRE
				LOC338667
				ADAMTS16
				CIDEB
				TEX13A
				GIPC2
				AP1S3
				NEB
				PPARD
				SPINT2
				SIDT2
				CEBPE
				ENHO
				CARD16
				ILDR1
				HIVEP3
				LAX1
				TLR10
				ESPN
				ADPRH
				HENMT1
				CACNA2D3
				FAP
				LGALS3BP
				C12orf74
				RFX6
				C20orf27
				SLAMF6
				KIAA0319
				DLGAP1
				KLK14
				ENTPD3
				S100B
				SLC30A1
				NRP1
				SNX11
				CPS1-IT
				PRRG3
				MPV17L2
				NPTX2
				TGFBI
				CTNNA3
				MOSC2
				UNC13A
				GSTA3
				SEMA4A
				DDAH1
				LOC284930
				LOC150622
				KIAA1024
				BOLA3
				PAOX
				MTFP1
				KATNAL2
				CAMK2A
				ZNF239
				C1orf54
				LOC339760
				LOC157860
				PRAP1
				CETP
				CLCN5
				LILRB4
				LOC339593
				NCRNA00028
				POU4F1
				CCR6
				GPR18
				RCBTB2
				SMAD6
				MS4A6A
				MSLN
				HLA-DMB
				TACSTD2
				AK7
				PGR
				ZNF517
				CYB5R1
				KRT73
				MYH11
				LIPC
				PM20D1
				C20orf166
				PACSIN3
				LSM14B
				CKM
				ZNRF2
				CAND2
				OTUD7B
				PGAM2
				METTL7B
				LOC284837
				CD180
				LOC284998
				SLC16A6
				IRF8
				MX2
				LOC503519
				CCRL2
				GNG4
				S100A16
				CCDC26
				TIFAB
				DLGAP3
				SPZ1
				OSTBETA
				AP2S1
				CHST2
				HAPLN4
				CCND1
				KIAA1409
				TACC2
				NPB
				ZNF642
				OASL
				ZMAT4
				GMPPB
				JPH1
				F8
				ENTPD1
				CDH3
				FAM71F1
				ADAMTS18
				HYLS1
				PRG2
				CALR3
				CDH17
				KMO
				CACNA2D4
				KLHL29
				HIGD1B
				ZNF57
				PCDH19
				SNCB
				ACY3
				CYP4F2
				BACE2
				LOC729683
				TLR7
				GALR2
				DDO
				ATF7IP2
				C3orf20
				CNDP2
				GNGT2
				PPT1
				TAGLN
				LOC100128025
				MYBPC1
				PFKFB4
				FAM200B
				CXCR2
				FARP1
				UPK3A
				PCDHGC4
				OTP
				CLEC5A
				NAGA
				CLEC12A
				GSTTP1
				IGFBPL1
				EPSTI1
				SIPA1L2
				KYNU
				MACC1
				LOC116437
				OAS2
				STYK1
				CLDN17
				LOC400128
				LY86
				CD93
				ZNF555
				NEXN
				PI4K2A
				EPX
				SPRYD5
				ME1
				CAPN3
				GTSF1
				RETN
				PLG
				CXorf30
				PTH2R
				SLC26A8
				SV2B
				KIF17
				SLC4A3
				MTMR11
				LOC100128501
				ROGDI
				DNAJA4
				ST18
				IL13RA2
				MRVI1
