# Supplementary material for: Activation of Vitamin D Receptor Pathway Enhances Differentiating Capacity in Acute Myeloid Leukemia with Isocitrate Dehydrogenase Mutations
Source: Preprints.org preprint supplement (doi:10.20944/preprints202108.0529.v1), 2021-08-27
Supplement: Supplementary file 4 [file Sabatier et al (2021) Supplemental Table 3.xlsx]

## Sheet: Feuil1
Table S3 : ATRA- and VD-responsive genes enriched in IDHMUT-AML and HL60WT +2HG
ATRA and VD responsive genes	ATRA responsive genes	VD responsive genes
ITGAM	CD180	SLC2A3
ICAM1	NPDC1	KLF10
CEBPE	PPARD	TNF
THEMIS2	OTUD7B	P2RX7
MYCN	IFIT5	MPO
RXRA	ANXA2	VIM
ITGAX	ADIG	CD86
	ITGA5	TNFAIP3
	IFIT1	CD80
	MIR223	TXNIP
	CLTCL1	SELL
	TAGLN	CXCL8
	CCDC26	NFATC2
	HOXB1	CD68
	BLNK	CCR7
	CCNA1	MNDA
	MGAT5	ITGA6
	SLC26A3
	HBZ
	COL8A2
	LMNA
	HOXC6
	SPZ1
	HPR
	RBP7
	IER3
	PRICKLE1
	WNT5B
	ZNF536
	PRAME
	HOXD8
	NCF2
	BCL6
	NME3
	ZSCAN4
	KLF5
	MEIS1
	HNF1B
	FGR
	TNFAIP2
	CEACAM6
	CCR6
	PALD1
	JUN
	CD1D
	NOG
	KRT80
	SOX3
	RBP1
	APBB1IP
	CXCL16
	DUOX2
	FGF8
	ZBTB16
	NEDD9
	TGFBI
	SMPD3
	CSF3R
	SERPINF1
	CD300LB
	PTGDS
	BTBD11
	HOXB2
	CSF3
	IL6ST
	CD33
	DHRS3
	SCPEP1
	POU4F1
	RBP4
	IL6R
	HOXB6
	FUT4
	RAB39A
	MYCL
	CHD7
	SOX14
	HSD17B6
	HIC1
	GRN
	HOXA4
	HES1
	CFD
	CBX2
	RET
	PBX3
	ENO2
	TLR3
	ANPEP
	CCL24
	HOXA5
	IRF8
	HOXA9
	GPRC5A
	HOXA3
	BST1
	SMAD5
	IL5RA
	BCL2A1
	CD38
	CEBPA
	HK3
	CYP4F2
	DHRS9
	ASB2
	CNTN4
	CCND1
	IGFBP2
	GALM
	ZRSR1
	S100A9
	CCRL2
	EXOC6B
	IL23R
	KLF4
	THBD
	MECOM
	FIGF
	ZSCAN10
	CYP2C18
	CD14
