# Supplementary material for: Activation of Vitamin D Receptor Pathway Enhances Differentiating Capacity in Acute Myeloid Leukemia with Isocitrate Dehydrogenase Mutations
Source: Preprints.org preprint supplement (doi:10.20944/preprints202108.0529.v1), 2021-08-27
Supplement: Supplementary file 5 [file Sabatier et al (2021) Supplemental Table 4.xlsx]

## Sheet: Gene Signatures
Table S4 : Gene signatures used for GSEA analysis
LATE_VD/VDR activation pathway (Warwick et al., 2021)	PID_RXR_VDR_PATHWAY (RXR and RAR heterodimerization with other nuclear receptor)
MMP1	ABCA1
LYPLA1P2	BCL2
AC011290.4	FAM120B
FAM182A	MED1
CYP24A1	NCOA1
CAMP	NCOR2
RFPL2	NR1H2
MSI1	NR1H3
RP11-605F22.2	NR1H4
LGALS9C	NR4A1
NOVA2	PPARA
SULT1C2	PPARD
SHE	PPARG
C3orf52	RARA
ADAMDEC1	RARB
LGALS9B	RARG
TDRD10	RPS6KB1
CD14	RXRA
ADAM28	RXRB
CLMN	RXRG
RP1-229K20.5	SREBF1
RP11-365P13.6	TGFB1
TREM1	THRA
CD7	THRB
GPER1	TNF
KRT35	VDR
CDH15
SLC12A1
ABCB4
CD274
RN7SL834P
RP11-598F7.3
FBP1
SLC37A2
HRAT92
DENND6B
ABCD2
NEGR1
CNR2
PDCD1LG2
FAM53B-AS1
TMEM151A
NTNG2
RP11-384O8.1
BTNL9
CXCL6
RHOH
TRAF5
SULF2
RP11-552D4.1
KCNF1
CD248
ROPN1B
SLC16A6
ARL5C
NBEAP1
RP11-982M15.7
RP5-1116H23.3
GRPR
AC093609.1
ORM2
KCNK13
TUBB4A
RP11-429J17.7
AC021218.2
CPB2
NCF1C
SPP1
ACVRL1
HP
LINC00304
SLC17A7
NWD1
TMEM37
HBEGF
NCF1
AGAP13P
RP11-120M18.2
AGAP7P
RP11-69J7.1
DAPK2
CARD11
ASAP2
SPATA13
ELL2
RP5-1007H16.1
PDLIM4
GNLY
AC011515.2
PDGFA
LRRC25
CXCL8
PDZD7
CTNNA2
MARCKS
MIR635
OSM
CRISPLD2
ALOX5
RP11-321E2.3
ANKRD22
AC109826.1
BCAS4
CDR2L
ARHGEF16
KCTD12
THEMIS2
PNOC
F12
RP11-23J18.1
PEX5L
CXCL1
SEMA6B
EPB41L1
ANOS2P
ORM1
TESPA1
TFAP2C
PDGFRL
APCDD1
ITGAM
NRG2
RP11-23F23.2
TLE6
CTD-2342N23.3
TRIM38
CD52
NAPSB
RP11-728F11.4
SPOCK1
AC000403.4
GMPR
RP11-309L24.10
ITSN1
GABRG2
CD38
RP11-259K5.2
RAVER2
NCF1B
CASC9
FXYD6
TRIM2
PLA2G16
ITGB5
SLC6A12
RP11-321E2.4
KIAA1211L
RP11-133K1.12
GJD3
FAM179A
RAPGEF3
LRRC3B
LPGAT1
PPARGC1B
TMEM52B
NINJ1
RP11-517P14.2
C1orf132
QPCT
LINC00659
USP2
EFL1
LILRB4
AC016735.2
MATN2
USP2-AS1
EFCAB12
CYP26B1
RP11-356M20.1
SMPDL3A
RP3-525N10.2
SIGLEC17P
ICAM1
CD300LB
DLGAP1-AS1
MREG
CTD-2521M24.8
RP1-95L4.4
SIRT4
PTGS1
RP11-432J24.5
DYSF
FUCA1
LAMC3
LILRA1
CAV1
NCOA4
IP6K3
ARSG
AIG1
SLC30A1
SEL1L3
TRIO
DNASE2
SYNJ2
MYO9B
SIGLEC16
SP100
LMF1-AS1
CDA
HIVEP2
IGFBP7
CHST2
THBD
CD79B
G0S2
MIR646HG
ZNF589
CECR1
KIAA1324L
PTAFR
PLXDC1
TMEM156
SFXN3
TMEM176A
RASSF2
NLRC4
PNPLA1
OXER1
CCR1
C5AR2
OCEL1
LGALS9
RET
PLEKHO1
LRP1
B3GNT8
GLIPR1
AC064834.1
FGD3
LNX1
SLC7A2
CTSZ
SYT3
FANCE
SKOR1
ADORA2BP1
ZCCHC2
RAB37
LBX2
MLXIPL
TFEB
SPATA9
GAS7
TMEM243
CYP19A1
INTS6L
IRF5
SCPEP1
IGFLR1
ITGB2
NFE2
TNRC6C-AS1
CCDC170
KCTD17
C8orf31
MIR570
WLS
SAT1
LRRC8A
P2RX7
NR1I3
RP11-43F13.3
CHCHD10
CTSD
BCO2
RP11-301G19.1
FRMD3
ZFP92
RNF165
CCRL2
BCL6
ACSL1
CDK18
TBC1D2
C1orf101
LGI2
KCNK5
MGAT4A
ADGRB3
GM2A
TMEM169
OTOF
SLC24A4
PPARGC1A
FBXO41
TMEM38A
RP11-124O11.1
RP5-892K4.1
CACNB1
LPO
SERPINB1
RP11-4L24.4
PRLR
SLC31A1
RP4-737E23.6
SCARB1
TMC6
FAM134B
PPARG
IPCEF1
HTT
RP5-862P8.2
ANKRD10
ZNF608
TMEM176B
TFE3
PKD2
GPT2
STS
NMNAT2
ZNF44
C20orf197
PDZD2
KIAA1683
NCOR2
RBM47
SH2D3C
FGR
HK1
WWC2
ANKRD10-IT1
WIPI1
LRIG1
TRAF3IP3
GADD45A
SEPT3
APBB2
ROS1
CCDC102A
AC093642.3
RP11-960L18.1
ST3GAL4
TSPAN13
RTN4R
FBLN1
FAM46C
RP11-1263C18.2
AC004987.9
CTC-378H22.2
PALD1
TNFAIP3
FGFR3
CD6
EMID1
IL17RE
BEX1
SIX3
MEGF6
LINC00884
UGT3A2
FOLR1
NXT2
RP11-96C21.2
PLCB4
MTSS1L
GSN
CHST4
PRR5L
NPTX1
HES2
TRGC2
SEMA6A
KHDRBS3
GPR176
WI2-87327B8.2
TGFB2
HSH2D
CIB3
MFAP4
ABCA1
SORD2P
EPHB6
RP11-849F2.9
RGMA
SHANK1
TMEM255A
CSPG4
ADGRG5
MLPH
MERTK
RP11-757G1.6
C3AR1
RP11-358L22.3
SERPINB2
CDKN1C
CCR7
F3
TRPC5OS
MORF4L2-AS1
OLFML3
DPYSL3
AGMO
NTNG1
F13A1
IL1R2
UNC79
TCN1
TMEM52
RP5-1028K7.2
TRNP1
COL2A1
CH507-9B2.1
AF064858.8
CCL3L3
RP11-121A14.2
LINC01202
HES1
SMIM1
KIRREL3
GGT5
RP11-403A3.3
SLC9C2
NAP1L4P1
LINC01046
RPSAP9
CCND1
TNFRSF19
CCL3
RP11-467J12.4
SIM1
FAP
BMP2
BTBD11
DEPTOR
CXCR3
PLEKHA1
RP11-55K13.1
RP11-445F6.2
LOH12CR2
MGAT4C
RP11-572C15.5
RP5-1185I7.1
CTD-3116E22.8
KANK4
RNU1-22P
OCSTAMP
RP1-136B1.1
CRYM
RP11-651L5.3
