# Supplementary material for: Activation of Vitamin D Receptor Pathway Enhances Differentiating Capacity in Acute Myeloid Leukemia with Isocitrate Dehydrogenase Mutations
Source: Preprints.org preprint supplement (doi:10.20944/preprints202108.0529.v1), 2021-08-27
Supplement: Supplementary file 6 [file Sabatier et al (2021) Supplemental Tables 5.xlsx]

## Sheet: Sheet1
Table S5 : Pharmacological substances (Genomatix) enriched in gene signature of Atra-treated HL60 IDH1R132H (HR132H) (related to Figure 1M).									ATRA-related Gene signature
									VD-related Gene Signature
Pharmacological substance	Pharmacological substance id	P-value	LOG10(p)-	Adjusted p-value	# Genes (observed)	# Genes (expected)	# Genes (observed) / # Genes (expected)	# Genes (total)	List of observed genes	Gene ids
CUPRAMMONIUM CELLULOSE	C0056591	3.32725e-06	5.47791	n/a	4	0.104583	38.2471	43	ITGAM, SELL, ITGAX, GZMA	3684, 6402, 3687, 3001
FUCOIDAN	C0060794	1.26515e-05	4.89786	n/a	5	0.308885	16.1873	127	ITGAM, SELL, GZMA, ITGA5, IRF1	3684, 6402, 3001, 3678, 3659
WEB 2086	C0078460	4.57462e-05	4.33965	n/a	3	0.0705328	42.5334	29	ALOX5AP, ITGAM, SELL	241, 3684, 6402
HYPERACUTE PANCREATIC CANCER VACCINE	C1831791	5.7049e-05	4.24375	n/a	2	0.0121608	164.462	5	ALOX5AP, ERAP2	241, 64167
IONOMYCIN	C0022020	6.69415e-05	4.1743	n/a	6	0.717489	8.3625	295	ITGAM, SELL, SLA, TRIB1, PLEK, ITGAX	3684, 6402, 6503, 10221, 5341, 3687
RECOMBINANT GRANULOCYTE COLONY STIMULATING FACTOR	C0376562	0.000237014	3.62523	n/a	3	0.121608	24.6694	50	ITGAM, SELL, ITGAX	3684, 6402, 3687
GAMMA GLOBULIN SERUM	C0305052	0.000266365	3.57452	n/a	3	0.126473	23.7206	52	TLR3, UBA7, ITGAX	7098, 7318, 3687
BAY X 1005	C0656891	0.000310911	3.50736	n/a	2	0.0267538	74.7557	11	ALOX5AP, ITGAM	241, 3684
OK 432	C0918027	0.00031464	3.50219	n/a	3	0.133769	22.4267	55	ITGAM, TLR3, ITGAX	3684, 7098, 3687
MANOALIDE	C0065711	0.000372524	3.42885	n/a	2	0.029186	68.526	12	SELL, TLR3	6402, 7098
TRETINOIN	C0040845	0.000426042	3.37055	n/a	9	2.40541	3.74156	989	GRN, ITGAM, SLA, TRIB1, TLR3, ITGAX, PLCB2, ITGA5, IRF1	2896, 3684, 6503, 10221, 7098, 3687, 5330, 3678, 3659
CALCITRIOL	C0006674	0.000729275	3.13711	n/a	4	0.413468	9.67426	170	ITGAM, PLCB2, GZMA, PRKCB	3684, 5330, 3001, 5579
INTERLEUKIN 12	C0123759	0.00074547	3.12757	n/a	4	0.4159	9.61769	171	ITGAM, TLR3, ITGAX, IRF1	3684, 7098, 3687, 3659
13 HYDROXYOCTADECADIENOIC ACID	C0090346	0.000761846	3.11813	n/a	2	0.0413468	48.3713	17	ITGAM, PRKCB	3684, 5579
TLR4 AGONIST GLA SE	C3827001	0.000955005	3.01999	n/a	2	0.0462111	43.2796	19	TLR3, GZMA	7098, 3001
APICULAREN A	C0764502	0.000955005	3.01999	n/a	2	0.0462111	43.2796	19	GRN, PRKCB	2896, 5579
ENDOPEPTIDASES	C0030946	0.000968087	3.01409	n/a	5	0.778293	6.42432	320	GRN, ERAP2, GZMA, ITGA5, SPECC1	2896, 64167, 3001, 3678, 92521
GLUCANS	C0017696	0.00116617	2.93324	n/a	3	0.209166	14.3427	86	GRN, ITGAM, GBP2	2896, 3684, 2634
TRIPAM CYS SER	C0091366	0.00116926	2.93209	n/a	2	0.0510755	39.1577	21	ITGAM, TLR3	3684, 7098
RECOMBINANT HUMAN GRANULOCYTE COLONY STIMULATING FACTOR	C1271481	0.00140441	2.85251	n/a	2	0.0559398	35.7527	23	ITGAM, SELL	3684, 6402
RO 31 8425	C0140783	0.00140441	2.85251	n/a	2	0.0559398	35.7527	23	ITGAM, PRKCB	3684, 5579
R 59949	C0072922	0.00152976	2.81538	n/a	2	0.058372	34.263	24	ITGAM, PRKCB	3684, 5579
PROTEASE INHIBITORS	C0033607	0.00207023	2.68398	n/a	3	0.255377	11.7473	105	CCR1, GZMA, ITGA5	1230, 3001, 3678
CHEMOKINE RECEPTOR ANTAGONIST	C1880030	0.00208243	2.68143	n/a	2	0.0681006	29.3683	28	CCR1, PRKCB	1230, 5579
MERBROMIN	C0025397	0.0022435	2.64907	n/a	3	0.262674	11.421	108	SELL, CCR1, ITGAX	6402, 1230, 3687
CC 4047	C1176324	0.00238919	2.62175	n/a	2	0.072965	27.4104	30	ITGAM, SELL	3684, 6402
INTERFERON BETA	C0015980	0.00255009	2.59344	n/a	2	0.0753971	26.5262	31	TLR3, IRF1	7098, 3659
INDO 1	C0063477	0.00271598	2.56607	n/a	2	0.0778293	25.6973	32	ITGAM, ITGAX	3684, 3687
BAPETA	C0043775	0.00288523	2.53982	n/a	3	0.286996	10.4531	118	GRN, ITGAM, PLEK	2896, 3684, 5341
MK 886	C0128640	0.0032433	2.48901	n/a	2	0.0851258	23.4946	35	ALOX5AP, ITGAM	241, 3684
RECOMBINANT INTERLEUKIN 8	C1527432	0.0032433	2.48901	n/a	2	0.0851258	23.4946	35	ITGAM, ITGAX	3684, 3687
AZASERINE	C0004480	0.00342888	2.46485	n/a	2	0.087558	22.842	36	SELL, PRKCB	6402, 5579
BAFILOMYCIN A1	C0052919	0.00371011	2.43061	n/a	3	0.313749	9.56177	129	GRN, FLOT1, TLR3	2896, 10211, 7098
U 0126	C0755562	0.00376186	2.4246	n/a	4	0.646956	6.1828	266	GBP2, ITGA5, SPRY1, IRF1	2634, 3678, 10252, 3659
ONE ALPHA	C0591905	0.00381462	2.41855	n/a	2	0.0924223	21.6398	38	ITGAM, CCR1	3684, 1230
FTY 720	C0388088	0.00395754	2.40257	n/a	3	0.321046	9.34446	132	SELL, ITGA5, PRKCB	6402, 3678, 5579
LOXORIBINE	C0209660	0.00421963	2.37473	n/a	2	0.0972866	20.5578	40	TLR3, IRF1	7098, 3659
STALLIMYCIN	C0244119	0.00421963	2.37473	n/a	2	0.0972866	20.5578	40	CCR1, IRF1	1230, 3659
1,2 DIACYLGLYCEROL	C0043791	0.00445821	2.35084	n/a	4	0.678574	5.89471	279	PLEK, PLCB2, PRKCB, SPRY1	5341, 5330, 5579, 10252
DIGLYCERIDES	C0012262	0.00457257	2.33984	n/a	4	0.683438	5.85276	281	PLEK, PLCB2, PRKCB, SPRY1	5341, 5330, 5579, 10252
QUIFLAPON	C2827320	0.00485287	2.314	n/a	1	0.00486433	205.578	2	ALOX5AP	241
BMS 817399	C3886791	0.00485287	2.314	n/a	1	0.00486433	205.578	2	CCR1	1230
BETA 1 INTERFERON	C0005148	0.00485287	2.314	n/a	1	0.00486433	205.578	2	TLR3	7098
BMS 457	C3713233	0.00485287	2.314	n/a	1	0.00486433	205.578	2	CCR1	1230
SODIUM HYDROGEN SULFITE	C0556246	0.00485287	2.314	n/a	1	0.00486433	205.578	2	GRN	2896
HAEMOPHILUS INFLUENZAE TYPE B POLYSACCHARIDE NEISSERIA MENINGITIDIS OUTER MEMBRANE PROTEIN CONJUGATE VACCINE	C0062085	0.00485287	2.314	n/a	1	0.00486433	205.578	2	ITGAM	3684
KALPAAMRUTHAA	C1721681	0.00485287	2.314	n/a	1	0.00486433	205.578	2	PRKCB	5579
BAY Y 1015	C0388707	0.00485287	2.314	n/a	1	0.00486433	205.578	2	ALOX5AP	241
ARRY 438162	C3888312	0.00485287	2.314	n/a	1	0.00486433	205.578	2	GRN	2896
FENPROPIMORPH	C0060193	0.00485287	2.314	n/a	1	0.00486433	205.578	2	LBR	3930
HYDROXYCHLOROQUINE	C0020336	0.0053153	2.27447	n/a	2	0.109447	18.2736	45	GRN, ITGAX	2896, 3687
KETAMINE	C0022614	0.00544783	2.26378	n/a	3	0.35996	8.33425	148	ITGAM, SELL, TLR3	3684, 6402, 7098
EFALIZUMAB	C1174995	0.00578633	2.2376	n/a	2	0.114312	17.496	47	ITGAM, ITGAX	3684, 3687
CPG ODN	C0914671	0.00586613	2.23165	n/a	3	0.369689	8.11493	152	TLR3, CCR1, ITGAX	7098, 1230, 3687
INTERFERON TYPE I	C0021743	0.0058955	2.22948	n/a	4	0.734514	5.44578	302	TLR3, UBA7, DDX60, IRF1	7098, 7318, 55601, 3659
ETHACRYNIC ACID	C0014963	0.00602878	2.21977	n/a	2	0.116744	17.1315	48	ALOX5AP, ITGAM	241, 3684
INDOMETHACIN	C0021246	0.0061922	2.20816	n/a	3	0.376986	7.95786	155	ALOX5AP, ITGAM, ITGAX	241, 3684, 3687
JACALIN	C0064133	0.00627582	2.20233	n/a	2	0.119176	16.7819	49	SELL, PLCB2	6402, 5330
DIHYDROETHIDIUM	C0644810	0.00652743	2.18526	n/a	2	0.121608	16.4462	50	ITGAM, SELL	3684, 6402
FLUVOXAMINE	C0085228	0.00652743	2.18526	n/a	2	0.121608	16.4462	50	PLEK, CCR1	5341, 1230
RECOMBINANT INTERFERON BETA	C0751599	0.00652743	2.18526	n/a	2	0.121608	16.4462	50	TLR3, IRF1	7098, 3659
NATALIZUMAB	C1172734	0.00704427	2.15216	n/a	2	0.126473	15.8137	52	SELL, ITGA5	6402, 3678
AM 803	C2975326	0.0072793	2.13791	n/a	1	0.0072965	137.052	3	ALOX5AP	241
AMINO ACID CHLOROMETHYL KETONES	C0002512	0.0072793	2.13791	n/a	1	0.0072965	137.052	3	GZMA	3001
CGS 13945	C0055218	0.0072793	2.13791	n/a	1	0.0072965	137.052	3	PRKCB	5579
DEC 205/NY ESO 1 FUSION PROTEIN CDX 1401	C2827536	0.0072793	2.13791	n/a	1	0.0072965	137.052	3	TLR3	7098
PENTRINITROL	C0070277	0.0072793	2.13791	n/a	1	0.0072965	137.052	3	PRKCB	5579
CPENSPM	C0247670	0.0072793	2.13791	n/a	1	0.0072965	137.052	3	SMOX	54498
GUE1654	C3852125	0.0072793	2.13791	n/a	1	0.0072965	137.052	3	ITGAM	3684
CID16020046	C3714181	0.0072793	2.13791	n/a	1	0.0072965	137.052	3	ITGAM	3684
WJD 008	C2975979	0.0072793	2.13791	n/a	1	0.0072965	137.052	3	PLEK	5341
PENTAMINE	C0070304	0.0072793	2.13791	n/a	1	0.0072965	137.052	3	SMOX	54498
ISOPROCARB	C0642330	0.0072793	2.13791	n/a	1	0.0072965	137.052	3	ITGAM	3684
ETP 46464	C4043952	0.0072793	2.13791	n/a	1	0.0072965	137.052	3	IRF1	3659
PENTALYTE	C0676371	0.0072793	2.13791	n/a	1	0.0072965	137.052	3	ITGAM	3684
10 HYDROXYDECANOIC ACID	C3256484	0.0072793	2.13791	n/a	1	0.0072965	137.052	3	IRF1	3659
PHT 427	C2934618	0.0072793	2.13791	n/a	1	0.0072965	137.052	3	PLEK	5341
2,2',3,3',4,4' HEXAHYDROXY 1,1' BIPHENYL 6,6' DIMETHANOL DIMETHYL ETHER	C0251001	0.0072793	2.13791	n/a	1	0.0072965	137.052	3	PRKCB	5579
SEROGROUP C MENINGOCOCCAL CONJUGATE VACCINE	C0915344	0.0072793	2.13791	n/a	1	0.0072965	137.052	3	TLR3	7098
PIROXICAM	C0031990	0.00730945	2.13612	n/a	2	0.128905	15.5153	53	ITGAM, ITGAX	3684, 3687
GAMMA TOCOPHEROL	C0017054	0.00730945	2.13612	n/a	2	0.128905	15.5153	53	PLEK, ITGA5	5341, 3678
LINOLEIC ACID	C0023749	0.00747993	2.1261	n/a	3	0.403739	7.43053	166	ALOX5AP, ITGAM, ITGAX	241, 3684, 3687
TEMSIROLIMUS	C1707080	0.00785323	2.10495	n/a	2	0.133769	14.9511	55	ITGA5, PRKCB	3678, 5579
DIALYSIS SOLUTIONS	C0011947	0.00785323	2.10495	n/a	2	0.133769	14.9511	55	ITGAM, ITGA5	3684, 3678
EFAVIRENZ	C0674428	0.00841476	2.07496	n/a	2	0.138633	14.4265	57	ITGAM, ITGAX	3684, 3687
CURDLAN	C0056608	0.00870212	2.06037	n/a	2	0.141066	14.1778	58	GRN, TLR3	2896, 7098
APICIDIN	C0531691	0.00928994	2.03199	n/a	2	0.14593	13.7052	60	ITGAM, CCR1	3684, 1230
7 AMINOACTINOMYCIN D	C0049832	0.00959035	2.01817	n/a	2	0.148362	13.4805	61	ITGAM, ITGA5	3684, 3678
DEXTRAN SULFATE SODIUM	C0079225	0.00961813	2.01691	n/a	3	0.442654	6.7773	182	TLR3, GZMA, IRF1	7098, 3001, 3659
DICYCLOHEXYLAMMONIUM	C0113759	0.00969428	2.01348	n/a	1	0.00972866	102.789	4	ITGAM	3684
ONO 6818	C0963626	0.00969428	2.01348	n/a	1	0.00972866	102.789	4	ITGAM	3684
FLLL62	C3660154	0.00969428	2.01348	n/a	1	0.00972866	102.789	4	IRF1	3659
SODIUM TETRADECYL SULFATE	C0037556	0.00969428	2.01348	n/a	1	0.00972866	102.789	4	PLEK	5341
BIIL 284	C0972319	0.00969428	2.01348	n/a	1	0.00972866	102.789	4	ITGAM	3684
N ACETYL 1 ASPARTYLGLUTAMIC ACID	C0067624	0.00969428	2.01348	n/a	1	0.00972866	102.789	4	ITGAM	3684
DIMETHYLDIOCTADECYLAMMONIUM	C0058261	0.00969428	2.01348	n/a	1	0.00972866	102.789	4	TLR3	7098
L 656224	C0064502	0.00969428	2.01348	n/a	1	0.00972866	102.789	4	PRKCB	5579
ATN 161	C1706674	0.00969428	2.01348	n/a	1	0.00972866	102.789	4	ITGA5	3678
BREQUINAR	C0280509	0.00969428	2.01348	n/a	1	0.00972866	102.789	4	IRF1	3659
ANR 94	C1613398	0.00969428	2.01348	n/a	1	0.00972866	102.789	4	ITGAM	3684
RS 504393	C3657798	0.00969428	2.01348	n/a	1	0.00972866	102.789	4	CCR1	1230
ETHAMSYLATE	C0014968	0.00969428	2.01348	n/a	1	0.00972866	102.789	4	ITGAM	3684
GLYCYL PROLYL ARGININE	C0061724	0.00969428	2.01348	n/a	1	0.00972866	102.789	4	ITGAX	3687
HILTONOL	C2698842	0.00969428	2.01348	n/a	1	0.00972866	102.789	4	TLR3	7098
TERREIC ACID	C0076133	0.00969428	2.01348	n/a	1	0.00972866	102.789	4	PLEK	5341
